# Supplementary material for: Accurate prediction of pressure and temperature T1/2 variation in solid state spin crossover by ab initio methods: the [CoII(dpzca)2] case
Source: Royal Society of Chemistry journal article supplement (doi:10.1039/d1tc03467g), 2021-01-01
Supplement: d1tc03467g1.pdf [file d1tc03467g1.pdf]

# Electronic Supporting Information

## Accurate Prediction of $T_{1/2}$ Variation with Pressure in Solid State Spin Crossover by *Ab Initio* Methods: the $[\text{Co}^{\text{II}}(\text{dpzca})_2]$ case

Luca Bondi,<sup>a,b</sup> Sally Brooker<sup>\*,a</sup> and Federico Totti<sup>\*,b</sup>

<sup>a</sup>Department of Chemistry and MacDiarmid institute for Advanced 60 Materials and Nanotechnology, University of Otago, PO Box 56, Dunedin, 9054 New Zealand.

<sup>b</sup>Department of Chemistry 'Ugo Schiff' and INSTM Research Unit, University of Florence, 50019 Sesto Fiorentino, Italy.

Corresponding author email: sbrooker@chemistry.otago.ac.nz

Corresponding author email: federico.totti@unifi.it

### Table of Contents

|                                                                                      |            |
|--------------------------------------------------------------------------------------|------------|
| <b>SUPPORTING INFORMATION</b> .....                                                  | <b>S1</b>  |
| <b>1. COMPUTATIONAL PROTOCOL</b> .....                                               | <b>S2</b>  |
| <b>2. COMPUTATIONAL PROTOCOL VALIDATION</b> .....                                    | <b>S4</b>  |
| 1.1. $U_{\text{EFF}}$ TUNING IN GEOMETRY OPTIMISATION PROCEDURE.....                 | S4         |
| 1.2. $U_{\text{EFF}}$ TUNING FOR CELL PARAMETERS IN CELL OPTIMISATION PROCEDURE..... | S7         |
| 1.3. $U_{\text{EFF}}(\text{Co}(D))$ TUNING IN CELL OPTIMISATION PROCEDURE.....       | S9         |
| <b>2. ADDITIONAL STRUCTURAL DATA</b> .....                                           | <b>S10</b> |
| 2.1. STRUCTURAL DISTORTIONS VS. PRESSURE.....                                        | S24        |
| 2.2. STRUCTURAL DISTORTIONS VS. MEASURED $T_{1/2}$ .....                             | S29        |
| 2.3. STRUCTURAL DISTORTIONS ASSOCIATED WITH SPIN STATE TRANSITION.....               | S34        |
| <b>3. ADDITIONAL ELECTRONIC DATA</b> .....                                           | <b>S36</b> |
| 3.1. LDOS: COBALT ATOMS.....                                                         | S46        |
| 3.2. LDOS: NITROGEN ATOMS.....                                                       | S55        |
| 3.3. LDOS: CARBON ATOMS.....                                                         | S57        |
| 3.2. MOLECULAR ORBITALS OF $[\text{Co}(\text{DPZCA})_2]$ .....                       | S59        |
| <b>4. ADDITIONAL DATA FOR GRADUAL SCO MODELLING</b> .....                            | <b>S83</b> |
| 4.1. CP2K 6.1 CALCULATED IR SPECTRA.....                                             | S83        |
| 4.2. IR/RAMAN SPECTRA ORCA 4.1 CODE .....                                            | S84        |
| 4.3. THERMODYNAMIC TERMS.....                                                        | S85        |

# 1. Computational Protocol

All periodic calculations were performed with the CP2K 6.1 quantum chemistry software,<sup>1</sup> which employs the Gaussian-plane waves formalism (GPW). Norm-conserving Goedecker-Tetter-Hutter (GTH) pseudopotentials<sup>2-4</sup> along with double zeta basis set with polarisation functions (DZVP-MOLOPT-SR) were employed for C, N, O, H atoms and DZVP-MOLOPT-SR-GTH basis set was applied to Co atoms. A cut-off of 450 Ry was applied for the plane wave expansion.<sup>5</sup>

The Anisimov simplified version<sup>6</sup> of the *DFT+U* approach<sup>7</sup> was used ( $U_{\text{eff}}$ ). The  $U_{\text{eff}}$  parameters were chosen to match the experimental X-ray data observables (cell parameters and atomic positions) of both  $\mathbf{1}_{\text{cryst,LS}}$  and  $\mathbf{1}_{\text{cryst,HS}}$  at 1 bar of pressure along with the corresponding  $T_{1/2}$  value (*abrupt*  $T_{1/2}\uparrow$  from ref<sup>8</sup>). Tests on  $U_{\text{eff}}$  values for Co, N, C, O, and H atoms were performed with revPBE functional<sup>9</sup> with rVV10<sup>10-11</sup> as non-local VdW correlation functional. The exact reproduction of the average  $T_{1/2}$  value (171 K) for the *abrupt* component of the SCO at 1 bar proved be very sensitive to the  $U_{\text{eff}}$  values chosen for the *d* orbitals of the cobalt ion (Co(*d*)) whilst the reproduction of the crystallographic parameters was needed to tune the  $U_{\text{eff}}$  on the *p*-orbitals on the nitrogen atoms (N(*p*); Table S2-S3). In such a framework, the best computational set up was achieved with  $U_{\text{eff}}(\text{Co}(d)) = 1.15$  eV and  $U_{\text{eff}}(\text{N}(p)) = 3.0$  eV. Cell optimisations were performed to very tight levels of convergence for the wavefunction ( $1.0 \times 10^{-9}$  Hartree) and for the atomic forces ( $1.0 \times 10^{-8}$  Hartree bohr<sup>-1</sup>).

Hessian matrices were calculated and checked to ensure that no imaginary eigenvalues values were present. Being performed at the  $\Gamma$  point,  $3N-3$  frequencies (optical modes) were computed and used to calculate the thermodynamic quantities (see below, Tables S14-S19).

This procedure was repeated for six out the seven pressures (1800, 2100, 2500, 2900, 3900 bar) reported in ref<sup>8</sup> at which the experimental SCO activity of  $\mathbf{1}_{\text{cryst}}$  was measured. For  $p = 4300$  bar,  $\mathbf{1}_{\text{cryst,HS}}$  did not reach satisfying convergence criteria. Finally, IR/Raman spectra were calculated for  $\mathbf{1}_{\text{cryst,LS}}$  and  $\mathbf{1}_{\text{cryst,HS}}$  in vacuum and in the charge field built over the optimised structures obtained at the end of the calculations performed with CP2K6.1 package and re-run with ORCA4.1 code,<sup>12</sup> using PBE functional<sup>13</sup> and def2-TZVPP basis sets.<sup>14-16</sup> Two different kind of calculations were performed: (i) re-optimising the isolated [Co<sup>II</sup>(*dpzca*)<sub>2</sub>] ( $\mathbf{1}_{\text{iso,LS}}$  and  $\mathbf{1}_{\text{iso,HS}}$ ) molecules in vacuum and (ii) re-

optimising the structures of one [Co(**dpzca**)<sub>2</sub>] molecule in a charge field (**1<sub>cf,LS</sub>** and **1<sub>cf,HS</sub>**) produced by the 3x3x1 supercell obtained at the end of the cell optimisation with CP2K6.1 code for each pressure. The charge field was set by replacing each atom kind with the respective Mulliken charge at the Potential Energy (*PES*) minima; the 3x3x1 supercell was obtained by replicating the original crystalline unit cells nine times. For both **1<sub>cf,LS</sub>** and **1<sub>cf,HS</sub>**: three times along the shorter *a*- and *c*-axes and once along the longer *b*-axes.

The effects of the cell shrinking were monitored by looking at the angular distortions within the complex, using a variety of parameters (Equations S1-S6 and Table S10); **RMSD** measures the average divergence between atomic position when the studied system is compared to a reference (in this study, the molecules in **1<sub>cryst,LS</sub>** and **1<sub>cryst,HS</sub>** at *p* = 1 bar) (Equation S1); **<D>** describes the average Co-N bond distance). **ζ** is the sum of the differences between individual Co-N bond distance vs. the mean Co-N bond (Equation S2);<sup>17</sup> **Δ** is the average of the differences between individual Co-N bond distance vs. the mean Co-N bond (Equation S3);<sup>18</sup> **Σ** describes the local angular deviation from the *cis* octahedral angles of 90° (Equation S4);<sup>19</sup> **Θ** measures the trigonal torsion, which is defined as the degree of twist from a perfect octahedron towards trigonal prismatic: it is obtained by the sum of the differences of the absolute value of all 24 unique angles (Equation S5).<sup>20</sup> Finally, **Ω** measures the three angles, ω, of each of the eight triangles (24 angles in total) found in a perfect octahedron (Equation S6).<sup>21</sup> For a perfect octahedral geometry, all the distortion parameters (**Σ**, **Θ**, **Ω**) are equal to zero. **<D>**, **ζ**, **Δ**, **Σ**, **Θ**, were calculated using OctaDist 2.6.1 software;<sup>22</sup> **RMSD** was calculated using VMD software.<sup>23</sup>

## 2. Computational Protocol Validation

### 1.1. $U_{eff}$ Tuning in Geometry Optimisation Procedure

Calculated curves for geometry optimisation performed on crystalline  $\mathbf{1}_{cry}$  at different values of  $U_{eff}(\text{Co}(d))$  are reported in Figure S2.  $U_{eff}(\text{Co}(d))$  range spreads from 3.0 eV (not reported in Figure S2 as  $\Delta H_{el,HS-LS} < 0$  eV; detail in Table S1) to 1.5 eV. For  $\Delta U_{eff}(\text{Co}(d)) = 1.5$  eV,  $\Delta H_{el,HS-LS}$  change is about 3.0 eV; this is more than enough to change the magnetic response of  $\mathbf{1}_{cry}$  from physically wrong (from  $U_{eff} = 3.0$  eV,  $\Delta H_{el,HS-LS} < 0$  eV), fully HS ( $U_{eff} = 2.5$  eV), SCO-active ( $U_{eff} = 2.375$  eV to  $U_{eff} = 2.25$  eV), almost fully LS before 400K ( $U_{eff} = 2.0$  eV) and, finally, fully LS ( $U_{eff} = 1.5$  eV).

Specifically, by decreasing  $U_{eff}$  magnitude of 0.125 eV (from  $U_{eff} = 2.375$  eV to  $U_{eff} = 2.25$  eV), the calculated  $T_{1/2}$  rises of 200K (Table S1). The fragility of the SCO phenomenon should be extremely clear: even if the  $U_{eff}$  term can be used to fine-tune the  $\Delta H_{el,HS-LS}$  gap, it is extremely complicated to get the exact value of experimental  $T_{1/2}$ ; indeed, for small variation in  $U_{eff}$  magnitude, the SCO phenomenon shifts largely. Finally, the best value of  $U_{eff}$  to reproduce the experimental SCO transition of  $\mathbf{1}_{cry}$  was set at 2.35 eV ( $T_{1/2} = 175$  K, Table S1).

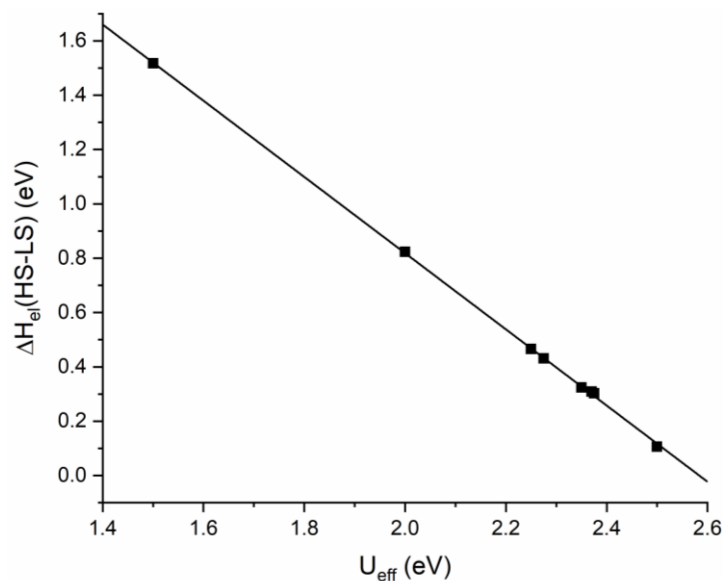

**Figure S1.** Correlation line established between the applied localising potential Hubbard  $U$  ( $U_{\text{eff}}$ ) to the  $\text{Co}^{\text{II}}$  d-orbitals. Reported line describes an extremely good correlation between the magnitude of the  $\Delta H_{\text{el,HS-LS}}$  gap (eV) vs. the applied  $U_{\text{eff}}$  (eV).

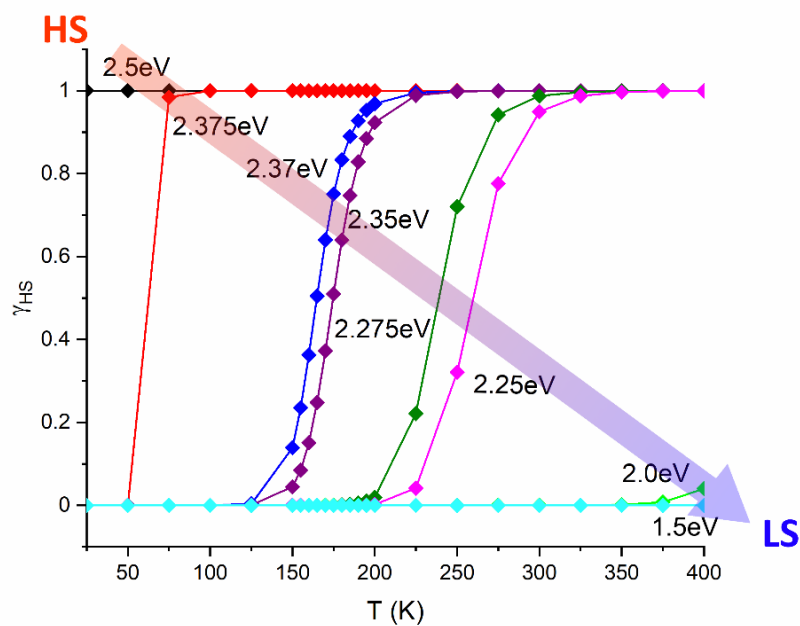

**Figure S2.** Reported results of the regular SCO transition of  $[\text{Co}^{\text{II}}(\text{dpzca})_2]$  for different values of  $U_{\text{eff}}$  (from 2.5 eV to 1.5 eV). Normal modes were calculated from a first calculation on  $1_{\text{cry,LS}}$  and  $1_{\text{cry,HS}}$  without applying any  $U_{\text{eff}}$ . Next,  $\Delta H_{\text{el,HS-LS}}$  gap (eV) was obtained by proceed with a further step of cell optimisation by applying various  $U_{\text{eff}}$  terms at  $\text{Co}(\text{d})$  orbitals. Colour code:  $U_{\text{eff}} = 2.5$  eV (black),  $U_{\text{eff}} = 2.375$  eV (red),  $U_{\text{eff}} = 2.37$  eV (blue),  $U_{\text{eff}} = 2.35$  eV (purple),  $U_{\text{eff}} = 2.275$  eV (olive),  $U_{\text{eff}} = 2.25$  eV (magenta),  $U_{\text{eff}} = 2.0$  eV (light green),  $U_{\text{eff}} = 1.5$  eV (light blue).

**Table S1.** Results of calculated electronic Enthalpy ( $H$ ) for on  $1_{\text{cry,LS}}$  and  $1_{\text{cry,HS}}$  at different values of  $U_{\text{eff}}$  obtained in the protocol of geometry optimisation to the  $\Delta H_{\text{el,HS-LS}}$  gap at the experimental  $T_{1/2}$ . In the last column on the right are reported theoretical values of  $T_{1/2}$  at the different applied Hubbard potentials.

| $U_{\text{eff}}$<br>(eV) | $H_{\text{el,HS}}$<br>(H) | $H_{\text{el,LS}}$<br>(H) | $H_{\text{el,HS-LS}}$<br>(H) | $\Delta H_{\text{el,HS-LS}}$<br>(Ev) | $T_{1/2}$<br>(K)      |
|--------------------------|---------------------------|---------------------------|------------------------------|--------------------------------------|-----------------------|
| 3.0                      | -1718.070                 | -1718.010                 | -0.059                       | -1.625                               | HS                    |
| 2.5                      | -1716.936                 | -1716.940                 | 0.003                        | 0.105                                | HS                    |
| 2.375                    | -1716.938                 | -1716.949                 | 0.011                        | 0.302                                | $50 < T_{1/2} < 75$   |
| 2.37                     | -1716.938                 | -1716.949                 | 0.011                        | 0.308                                | 165                   |
| 2.35                     | -1716.938                 | -1716.950                 | 0.012                        | 0.324                                | 175                   |
| 2.275                    | -1716.939                 | -1716.955                 | 0.015                        | 0.430                                | $225 < T_{1/2} < 250$ |
| 2.25                     | -1716.939                 | -1716.957                 | 0.017                        | 0.465                                | $250 < T_{1/2} < 275$ |
| 2                        | -1716.944                 | -1716.974                 | 0.030                        | 0.823                                | $T_{1/2} > 400$       |
| 1.5                      | -1716.957                 | -1717.013                 | 0.056                        | 1.517                                | LS                    |

## 1.2. $U_{\text{eff}}$ Tuning for Cell Parameters in Cell Optimisation Procedure

**Table S2.** Final cell parameters obtained in the protocol validation step of applying further  $U_{\text{eff}}$  for improving the emulation of on  $1_{\text{cry,HS}}$  at pressure 1 bar.

| <b>LS</b>  | <b>Cell Parameters</b>             |                                    |                                    |                                     |                                    |                                     | <b><math>U_{\text{eff}}</math></b> |                          |                          |                          |                          |
|------------|------------------------------------|------------------------------------|------------------------------------|-------------------------------------|------------------------------------|-------------------------------------|------------------------------------|--------------------------|--------------------------|--------------------------|--------------------------|
|            | <b><math>a / \text{\AA}</math></b> | <b><math>b / \text{\AA}</math></b> | <b><math>c / \text{\AA}</math></b> | <b><math>\alpha / ^\circ</math></b> | <b><math>\beta / ^\circ</math></b> | <b><math>\gamma / ^\circ</math></b> | <b><math>Co(d)</math></b>          | <b><math>N(p)</math></b> | <b><math>O(p)</math></b> | <b><math>C(p)</math></b> | <b><math>H(s)</math></b> |
| <b>EXP</b> | <b>8.668</b>                       | <b>27.656</b>                      | <b>8.514</b>                       | <b>90.00</b>                        | <b>91.52</b>                       | <b>90.00</b>                        | <b>-</b>                           | <b>-</b>                 | <b>-</b>                 | <b>-</b>                 | <b>-</b>                 |
|            | 8.578                              | 27.275                             | 8.167                              | 90.03                               | 91.33                              | 90.12                               | 1.6                                | 0                        | 0                        | 0                        | 0                        |
|            | 8.577                              | 27.276                             | 8.168                              | 90.03                               | 91.38                              | 90.10                               | 1.75                               | 0                        | 0                        | 0                        | 0                        |
|            | 8.576                              | 27.279                             | 8.168                              | 90.03                               | 91.39                              | 90.10                               | 1.8                                | 0                        | 0                        | 0                        | 0                        |
|            | 8.575                              | 27.286                             | 8.169                              | 90.05                               | 91.42                              | 90.12                               | 1.875                              | 0                        | 0                        | 0                        | 0                        |
|            | 8.566                              | 27.289                             | 8.175                              | 90.09                               | 91.47                              | 90.07                               | 1.9                                | 0                        | 0                        | 0                        | 0                        |
|            | 8.575                              | 27.237                             | 8.186                              | 90.00                               | 91.48                              | 90.23                               | 1.65                               | 1                        | 0                        | 0                        | 0                        |
|            | 8.573                              | 27.25                              | 8.186                              | 89.95                               | 91.27                              | 90.22                               | 1.65                               | 1.5                      | 0                        | 0                        | 0                        |
|            | 8.569                              | 27.238                             | 8.197                              | 89.96                               | 91.19                              | 90.23                               | 1.65                               | 2                        | 0                        | 0                        | 0                        |
|            | 8.375                              | 27.532                             | 8.367                              | 89.93                               | 90.78                              | 90.04                               | 1.65                               | 3                        | 0                        | 0                        | 0                        |
|            | 8.566                              | 27.243                             | 8.200                              | 89.97                               | 91.15                              | 90.25                               | 1.65                               | 2                        | 0                        | 0                        | 0                        |
|            | <b>8.556</b>                       | <b>8.555</b>                       | <b>27.342</b>                      | <b>89.98</b>                        | <b>90.07</b>                       | <b>89.97</b>                        | <b>1.15</b>                        | <b>3</b>                 | <b>0</b>                 | <b>0</b>                 | <b>0</b>                 |
|            | 8.375                              | 27.532                             | 8.367                              | 89.94                               | 90.77                              | 90.04                               | 1.65                               | 3                        | 0                        | 0                        | 0                        |
|            | 8.574                              | 27.155                             | 8.184                              | 90.02                               | 91.60                              | 90.19                               | 1.65                               | 2                        | 0                        | 2                        | 0                        |
|            | 8.38                               | 27.561                             | 8.386                              | 89.96                               | 90.76                              | 89.92                               | 2                                  | 3                        | 0                        | 2                        | 0                        |
|            | 8.382                              | 27.581                             | 8.393                              | 89.99                               | 90.77                              | 89.89                               | 2                                  | 3                        | 0                        | 3                        | 0                        |

**Table S3.** Final cell parameters obtained in the protocol validation step of applying further  $U_{\text{eff}}$  for improving the emulation of  $1_{\text{cry,LS}}$  at pressure 1 bar.

| <i>HS</i>  | <i>Cell Parameters</i> |               |               |              |              |              | $U_{\text{eff}}$ |             |             |             |             |
|------------|------------------------|---------------|---------------|--------------|--------------|--------------|------------------|-------------|-------------|-------------|-------------|
|            | <i>a</i> /Å            | <i>b</i> /Å   | <i>c</i> /Å   | $\alpha$ /°  | $\beta$ /°   | $\gamma$ /°  | <i>Co(d)</i>     | <i>N(p)</i> | <i>O(p)</i> | <i>C(p)</i> | <i>H(s)</i> |
| <b>EXP</b> | <b>8.795</b>           | <b>8.795</b>  | <b>27.918</b> | <b>90.00</b> | <b>90.00</b> | <b>90.00</b> | -                | -           | -           | -           | -           |
|            | 8.590                  | 8.556         | 26.982        | 90.20        | 90.08        | 90.16        | 1.6              | 0           | 0           | 0           | 0           |
|            | 8.586                  | 8.553         | 29.963        | 90.19        | 90.07        | 90.15        | 1.75             | 0           | 0           | 0           | 0           |
|            | 8.618                  | 8.629         | 27.406        | 90.04        | 90.00        | 89.95        | 1.8              | 0           | 0           | 0           | 0           |
|            | 8.656                  | 8.665         | 27.536        | 90.03        | 90.00        | 89.97        | 1.875            | 0           | 0           | 0           | 0           |
|            | 8.665                  | 8.676         | 27.566        | 90.03        | 90.00        | 89.97        | 1.9              | 0           | 0           | 0           | 0           |
|            | 8.590                  | 8.569         | 26.991        | 90.24        | 90.19        | 90.10        | 1.65             | 1           | 0           | 0           | 0           |
|            | 8.589                  | 8.563         | 27.001        | 90.23        | 90.19        | 90.13        | 1.65             | 1.5         | 0           | 0           | 0           |
|            | 8.567                  | 8.567         | 27.046        | 90.18        | 90.38        | 89.99        | 1.65             | 2           | 0           | 0           | 0           |
|            | 8.572                  | 8.571         | 27.399        | 89.96        | 90.10        | 90.01        | 1.65             | 3           | 0           | 0           | 0           |
|            | 8.584                  | 8.561         | 26.967        | 90.24        | 90.19        | 90.11        | 1.65             | 2           | 0           | 2           | 0           |
|            | <b>8.300</b>           | <b>27.355</b> | <b>8.282</b>  | <b>89.86</b> | <b>90.84</b> | <b>89.73</b> | <b>1.15</b>      | <b>3</b>    | <b>0</b>    | <b>0</b>    | <b>0</b>    |
|            | 8.586                  | 8.585         | 27.369        | 89.98        | 90.05        | 90.01        | 2                | 3           | 0           | 2           | 0           |
|            | 8.592                  | 8.591         | 27.382        | 89.98        | 90.05        | 90.01        | 2                | 3           | 0           | 3           | 0           |
|            | 8.615                  | 8.610         | 27.086        | 89.99        | 90.01        | 90.02        | 2                | 3           | 3           | 3           | 1           |
|            | 8.607                  | 8.613         | 27.191        | 89.91        | 90.18        | 89.92        | 2                | 3           | 0           | 3           | 1           |

### 1.3. $U_{\text{eff}}(\text{Co}(d))$ Tuning in Cell Optimisation Procedure

**Table S4.** Results of calculated electronic Enthalpy ( $H$ ) for on  $1_{\text{cry,LS}}$  and  $1_{\text{cry,HS}}$  at different values of  $U_{\text{eff}}$  obtained in the protocol of cell optimisation to the  $\Delta H_{\text{el,HS-LS}}$  gap at the experimental  $T_{1/2}$ . In the last column on the right are reported theoretical values of  $T_{1/2}$  at the different applied Hubbard potentials.

| $U_{\text{eff}} / \text{eV}$ | $H_{\text{el,HS}} / H$ | $H_{\text{el,LS}} / H$ | $H_{\text{el,HS-LS}} / H$ | $\Delta H_{\text{el,HS-LS}} / \text{eV}$ | $T_{1/2} (\text{K})$  |
|------------------------------|------------------------|------------------------|---------------------------|------------------------------------------|-----------------------|
| <b>2.35</b>                  | -1716.96               | -1716.95               | -0.013                    | -0.361                                   | HS                    |
| <b>1.75</b>                  | -1713.68               | -1713.66               | -0.013                    | -0.348                                   | HS                    |
| <b>1.25</b>                  | -1713.70               | -1713.71               | 0.014                     | +0.373                                   | $75 < T_{1/2} < 100$  |
| <b>1.15</b>                  | -1713.70               | -1713.71               | 0.012                     | +0.322                                   | 175                   |
| <b>1.00</b>                  | -1713.71               | -1713.72               | 0.019                     | +0.526                                   | $275 < T_{1/2} < 300$ |
| <b>0.75</b>                  | -1713.72               | -1713.75               | 0.030                     | +0.813                                   | $T_{1/2} > 400$       |
| <b>0.50</b>                  | -1713.72               | -1713.77               | 0.044                     | +1.199                                   | LS                    |
| <b>0.25</b>                  | -1713.73               | -1713.79               | 0.058                     | +1.571                                   | LS                    |
| <b>0.00</b>                  | -1713.75               | -1713.81               | 0.069                     | +1.881                                   | LS                    |

**Table S5.** Error analysis of divergence between the calculated and the experimental unit cell parameters at the available pressures of 1 bar ( $1_{\text{cry,HS,1bar}}$  and  $1_{\text{cry,LS,1bar}}$ ) and 4300 bar ( $1_{\text{cry,LS,4300bar}}$ ). Note that each calculation is performed at the absolute temperature of 0 K. 1 bar =  $10^{-4}$  Pa.

| Cell Param.                    | $1_{\text{cry,HS}}$ |        | $1_{\text{cry,LS}}$ |        |          |       |
|--------------------------------|---------------------|--------|---------------------|--------|----------|-------|
|                                | 1 bar               |        | 1 bar               |        | 4300 bar |       |
|                                | Exp.                | Calc.  | %                   | Exp.   | Calc.    | %     |
| <b>a / Å</b>                   | 8.795               | 8.556  | -2.7%               | 8.668  | 8.366    | -3.5% |
| <b>b / Å</b>                   | 8.795               | 8.555  | -2.7%               | 27.656 | 27.536   | -0.4% |
| <b>c / Å</b>                   | 27.918              | 27.342 | -2.1%               | 8.514  | 8.357    | -1.8% |
| <b><math>\alpha</math> / °</b> | 90.00               | 89.979 | -0.1%               | 90.00  | 89.971   | -0.1% |
| <b><math>\beta</math> / °</b>  | 90.00               | 90.065 | +0.1%               | 91.52  | 90.925   | -0.7% |
| <b><math>\gamma</math> / °</b> | 90.00               | 89.969 | -0.1%               | 90.00  | 89.901   | -0.1% |
| <b>Av. Error</b>               | -                   | -      | 1.3%                |        |          | 1.1%  |

## 2. Additional Structural Data

$$RMSD = \sqrt{\frac{1}{n} \sum_{i=1}^n ((v_{ix} - w_{ix})^2 + (v_{iy} - w_{iy})^2 + (v_{iz} - w_{iz})^2)} \quad (\text{Eq. S1})$$

$$\zeta = \sum_{i=1}^6 |d_i - d_{mean}| \quad (\text{Eq. S2})$$

$$\Delta = \frac{1}{6} \sum_{i=1}^6 \left( \frac{|d_i - d_{mean}|}{d_{mean}} \right)^2 \quad (\text{Eq. S3})$$

$$\Sigma = \sum_{i=1}^{12} |90 - \phi_i| \quad (\text{Eq. S4})$$

$$\theta = \sum_{i=1}^{24} |90 - \theta_i| \quad (\text{Eq. S5})$$

$$\Omega = \sum_{i=1}^{24} |60 - \omega_i| \quad (\text{Eq. S6})$$

**Table S6.** Reported variation in the cell volume for on  $1_{\text{cry,LS}}$  and  $1_{\text{cry,HS}}$  at different pressures. Reference system is considered at the external pressure of 1 bar. Results are reported in  $\text{\AA}^3$ .

| p / bar | HS / $\text{\AA}^3$ | LS / $\text{\AA}^3$ | % HS            | % LS            |
|---------|---------------------|---------------------|-----------------|-----------------|
| 1       | 2001.27             | 1925.80             | -               | -               |
| 1800    | 1978.99             | 1906.64             | -22.28 (-1.11%) | -46.16 (-2.36%) |
| 2100    | 1974.65             | 1903.71             | -26.62 (-1.33%) | -49.09 (-2.51%) |
| 2500    | 1970.41             | 1899.97             | -30.86 (-1.54%) | -52.83 (-1.54%) |
| 2900    | 1960.62             | 1893.81             | -40.65 (-2.03%) | -58.99 (-3.02%) |
| 3900    | 1970.20             | 1862.75             | -31.07 (-1.55%) | -90.05 (-4.61%) |
| 4300    | 1965.55             | 1897.99             | -35.72 (-1.78%) | -54.81 (-2.81%) |

**Table S7.** Reported correlation factor in the analysis of the variation of the structural parameters of the unit cell for on  $1_{\text{cry,LS}}$  and  $1_{\text{cry,HS}}$  versus the seven different pressures (and related experimental  $T_{1/2}$ ).

|                     |                     | $R^2(\text{pressure})$ | $R^2(T_{1/2}(\text{exp.}))$ |
|---------------------|---------------------|------------------------|-----------------------------|
| $1_{\text{cry,LS}}$ | a / $\text{\AA}$    | 0.47 (Fig. S3)         | 0.41 (Fig. S4)              |
|                     | b / $\text{\AA}$    | 0.54 (Fig. S5)         | 0.64 (Fig. S6)              |
|                     | c / $\text{\AA}$    | 0.63 (Fig. S7)         | 0.13 (Fig. S8)              |
|                     | $\alpha$ / $^\circ$ | 0.74 (Fig. S9)         | 0.77 (Fig. S10)             |
|                     | $\beta$ / $^\circ$  | 0.64 (Fig. S11)        | 0.70 (Fig. S12)             |
|                     | $\gamma$ / $^\circ$ | 0.39 (Fig. S13)        | 0.36 (Fig. S14)             |
| $1_{\text{cry,HS}}$ | a / $\text{\AA}$    | 0.71 (Fig. S15)        | 0.49 (Fig. S16)             |
|                     | b / $\text{\AA}$    | 0.59 (Fig. S17)        | 0.58 (Fig. S18)             |
|                     | c / $\text{\AA}$    | 0.93 (Fig. S19)        | 0.86 (Fig. S20)             |
|                     | $\alpha$ / $^\circ$ | 0.20 (Fig. S21)        | 0.23 (Fig. S22)             |
|                     | $\beta$ / $^\circ$  | 0.23 (Fig. S23)        | 0.25 (Fig. S24)             |
|                     | $\gamma$ / $^\circ$ | 0.20 (Fig. S25)        | 0.21 (Fig. S26)             |

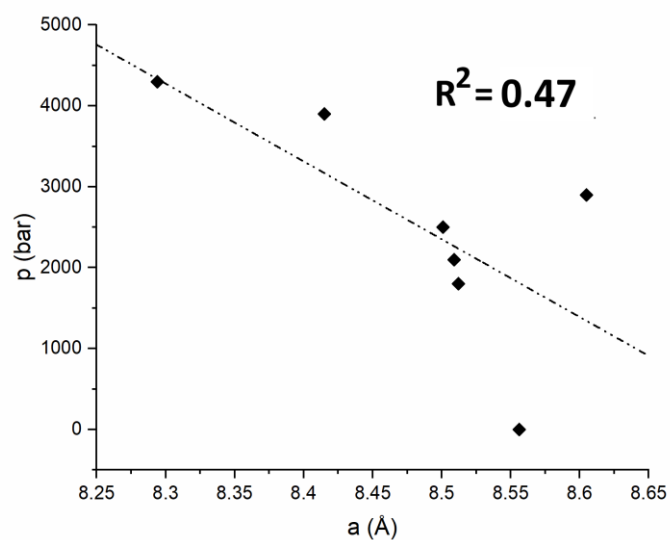

**Figure S3.** Reported correlation factor  $R^2$  for the variation of the length of the a-axis of  $1_{\text{cry,LS}}$  at the pressure increase ( $R^2 = 0.47$ ).

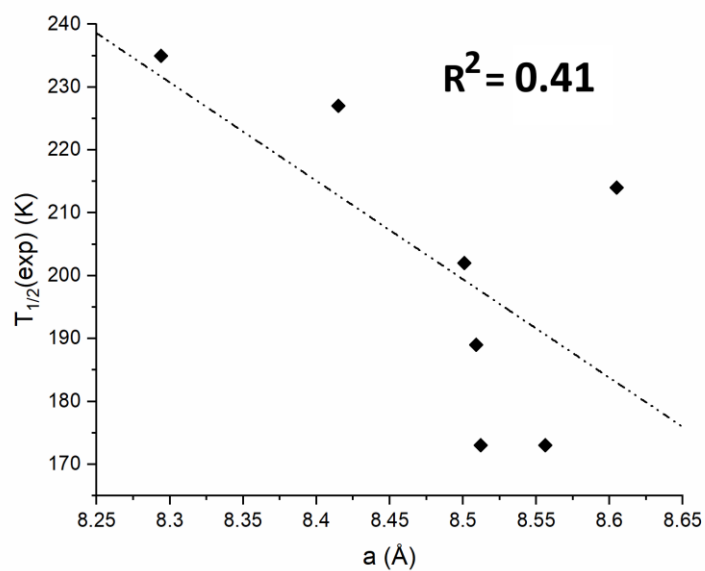

**Figure S4.** Reported correlation factor  $R^2$  for the variation of the length of the a-axis of  $1_{\text{cry,LS}}$  at the increase of the measured  $T_{1/2}$  ( $R^2 = 0.41$ ).

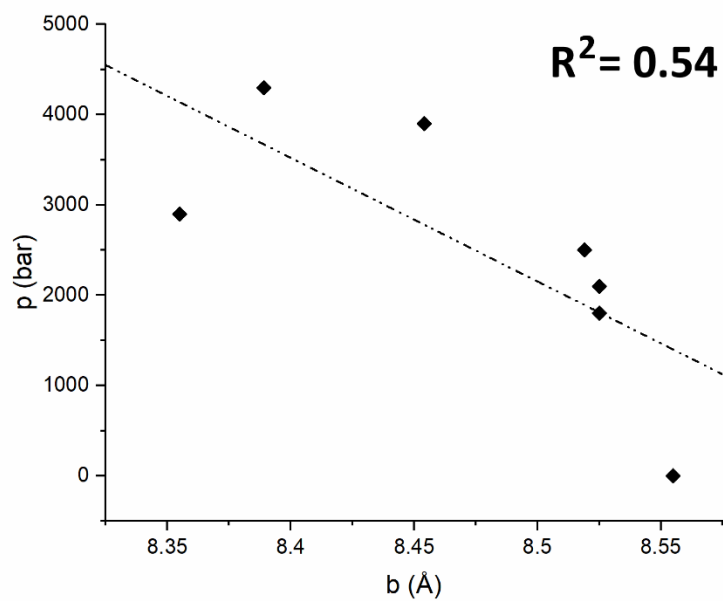

**Figure S5.** Reported correlation factor  $R^2$  for the variation of the length of the  $b$ -axis of  $1_{\text{cry,LS}}$  at the pressure increase ( $R^2 = 0.54$ ).

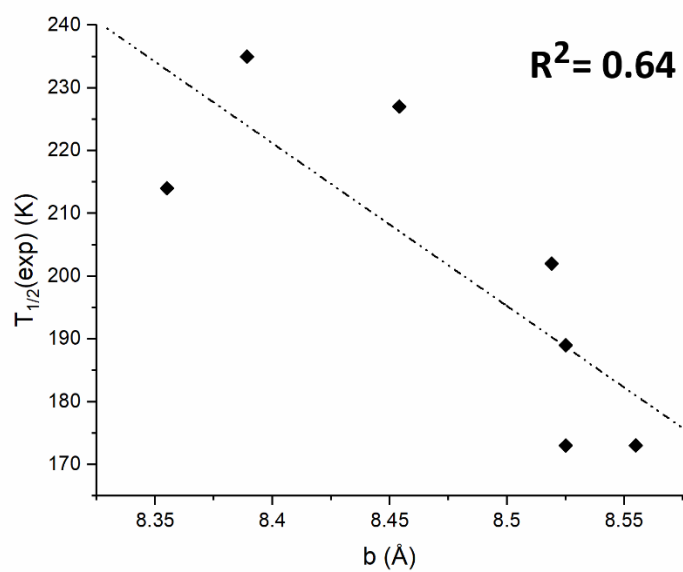

**Figure S6.** Reported correlation factor  $R^2$  for the variation of the length of the  $b$ -axis of  $1_{\text{cry,LS}}$  at the increase of the measured  $T_{1/2}$  ( $R^2 = 0.64$ ).

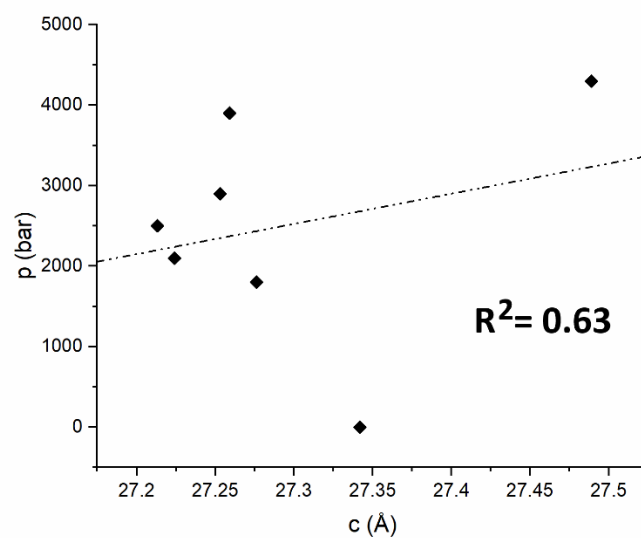

**Figure S7.** Reported correlation factor  $R^2$  for the variation of the length of the  $c$ -axis of  $1_{\text{cry,LS}}$  at the pressure increase ( $R^2 = 0.63$ ).

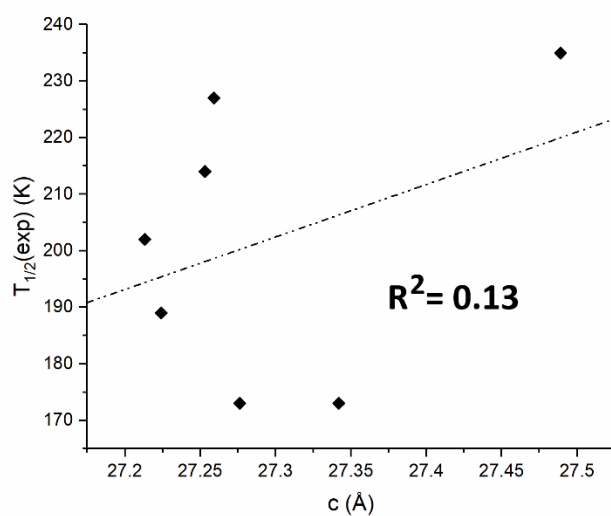

**Figure S8.** Reported correlation factor  $R^2$  for the variation of the length of the  $c$ -axis of  $1_{\text{cry,LS}}$  at the increase of the measured  $T_{1/2}$  ( $R^2 = 0.13$ ).

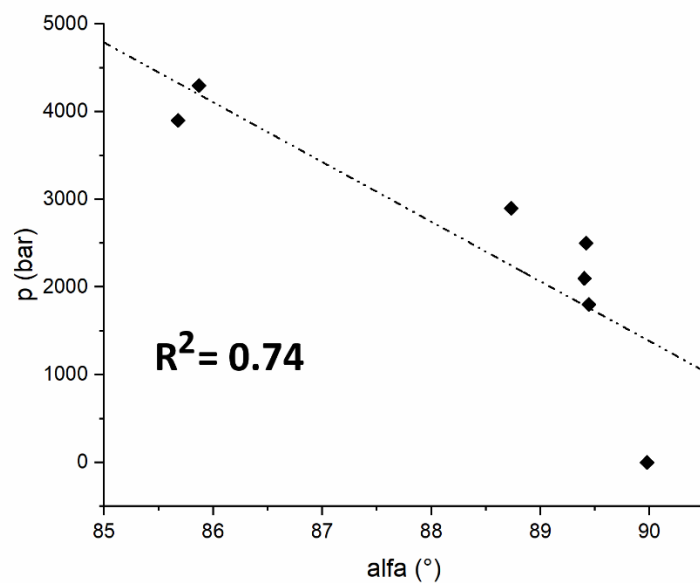

**Figure S9.** Reported correlation factor  $R^2$  for the variation of the magnitude of the  $\alpha$  angle of  $1_{cry,LS}$  at the pressure increase ( $R^2 = 0.74$ ).

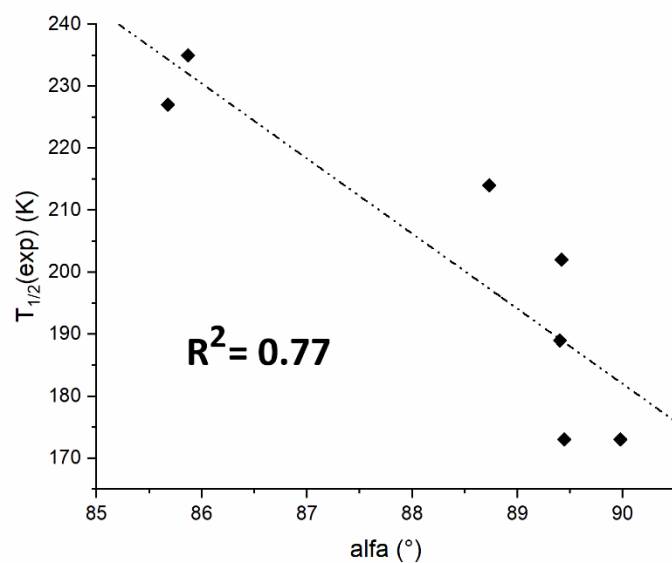

**Figure S10.** Reported correlation factor  $R^2$  for the variation of the magnitude of the  $\alpha$  angle of  $1_{cry,LS}$  at the increase of the measured  $T_{1/2}$  ( $R^2 = 0.70$ ).

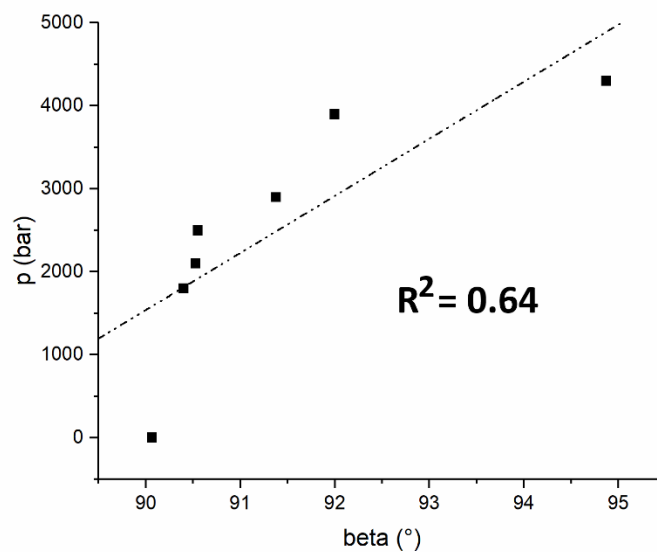

**Figure S11.** Reported correlation factor  $R^2$  for the variation of the magnitude of the  $\beta$  angle of  $1_{\text{cry,LS}}$  at the pressure increase ( $R^2 = 0.64$ ).

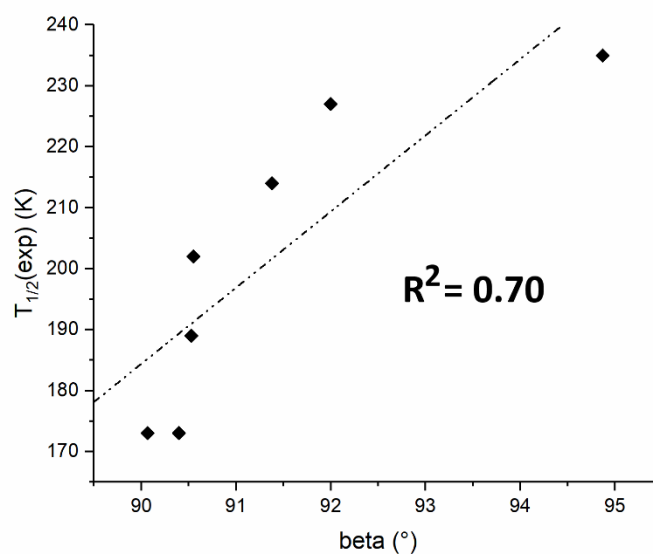

**Figure S12.** Reported correlation factor  $R^2$  for the variation of the magnitude of the  $\beta$  angle of  $1_{\text{cry,LS}}$  at the increase of the measured  $T_{1/2}$  ( $R^2 = 0.70$ ).

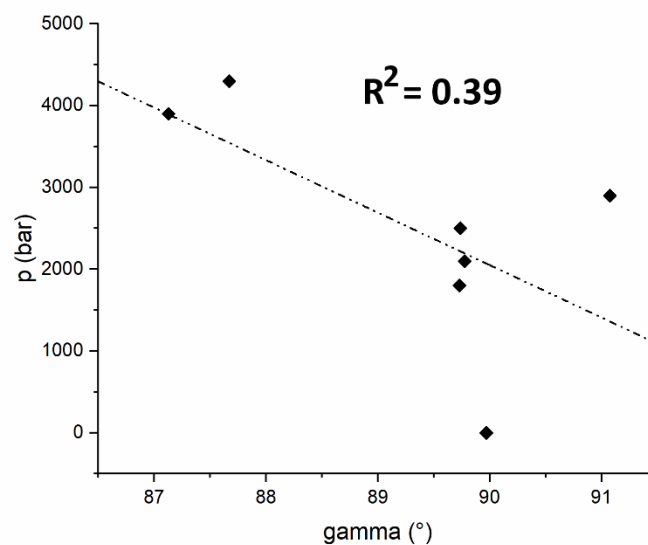

**Figure S13.** Reported correlation factor  $R^2$  for of the variation of the magnitude of the  $\gamma$  angle of  $1_{cry,LS}$  at the pressure increase ( $R^2 = 0.39$ ).

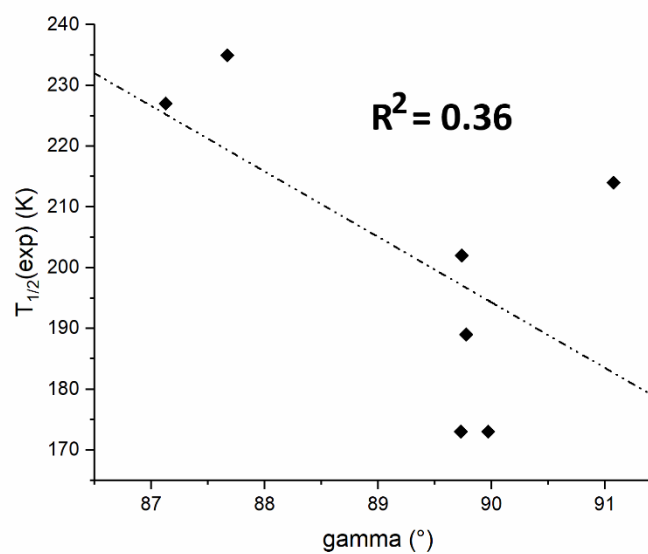

**Figure S14.** Reported correlation factor  $R^2$  for the variation of the magnitude of the  $\gamma$  angle of  $1_{cry,LS}$  at the increase of the measured  $T_{1/2}$  ( $R^2 = 0.36$ ).

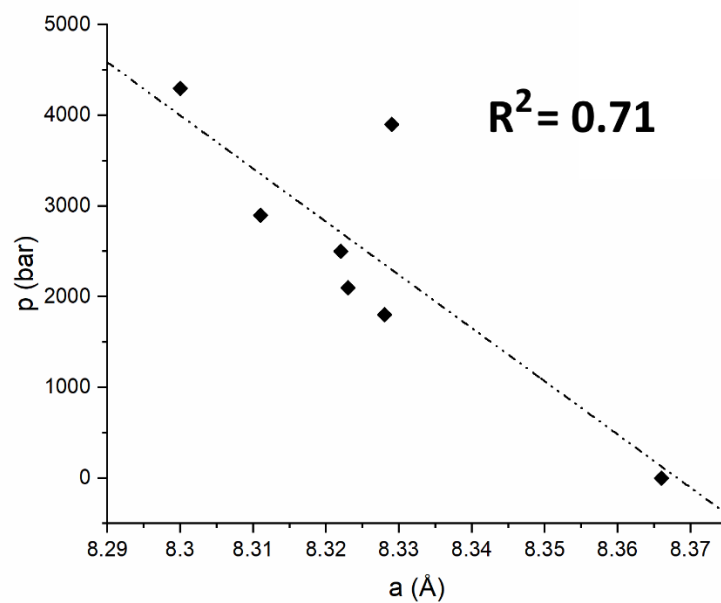

**Figure S15.** Reported correlation factor  $R^2$  for the variation of the length of the *a*-axis of **1<sub>cry,HS</sub>** at the pressure increase ( $R^2 = 0.71$ ).

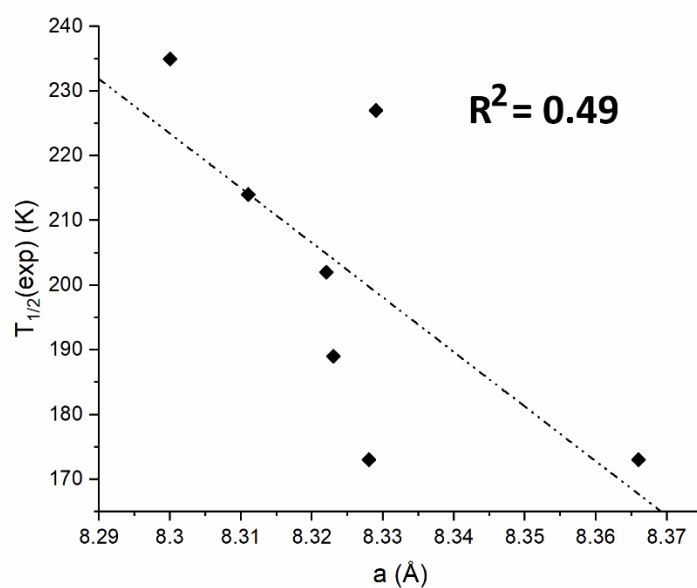

**Figure S16.** Reported correlation factor  $R^2$  for the variation of the length of the *a*-axis of **1<sub>cry,HS</sub>** at the increase of the measured  $T_{1/2}$  ( $R^2 = 0.49$ ).

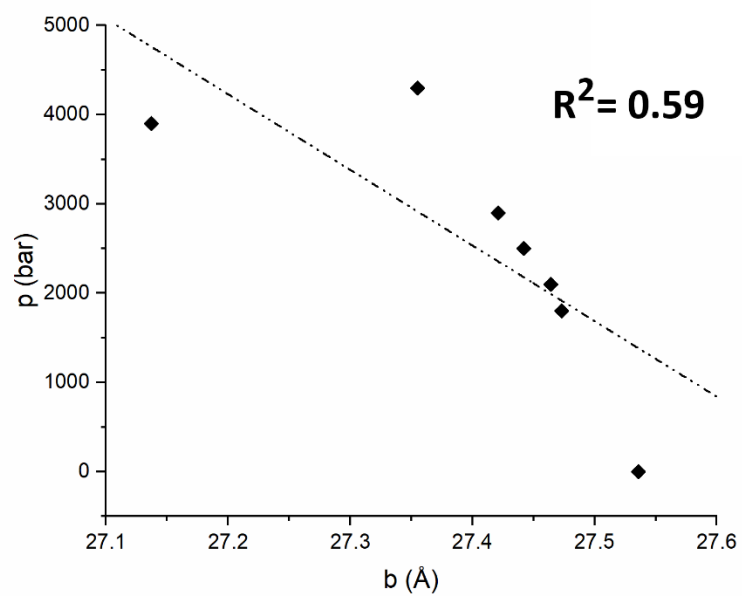

**Figure S17.** Reported correlation factor  $R^2$  for the variation of the length of the  $b$ -axis of  $1_{\text{cry,HS}}$  at the pressure increase ( $R^2 = 0.59$ ).

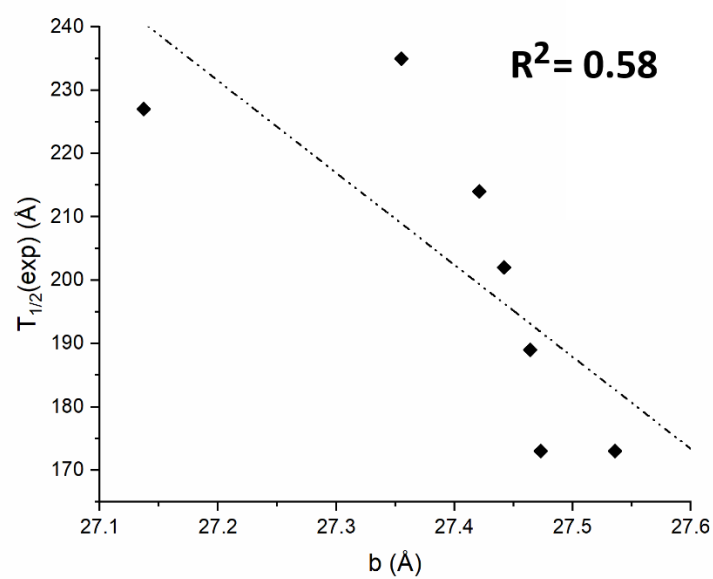

**Figure S18.** Reported correlation factor  $R^2$  for the variation of the length of the  $b$ -axis of  $1_{\text{cry,HS}}$  at the increase of the measured  $T_{1/2}$  ( $R^2 = 0.58$ ).

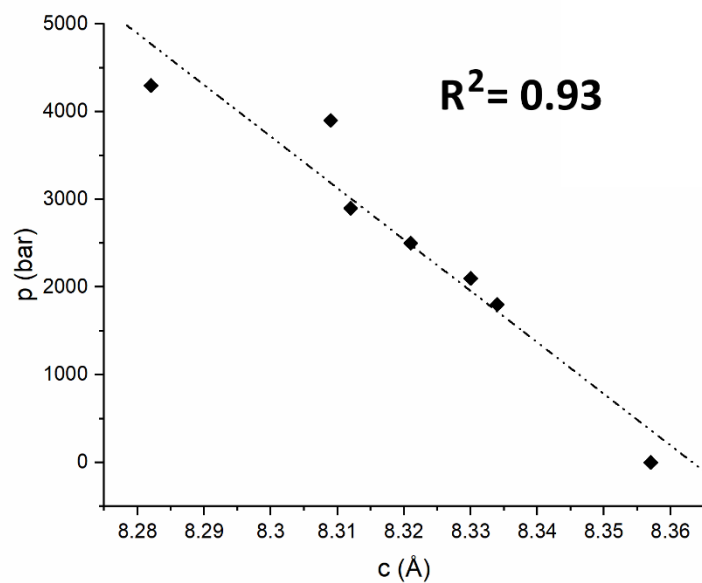

**Figure S19.** Reported correlation factor  $R^2$  for of the variation of the length of the c-axis of  $1_{\text{cry,HS}}$  at the pressure increase ( $R^2 = 0.93$ ).

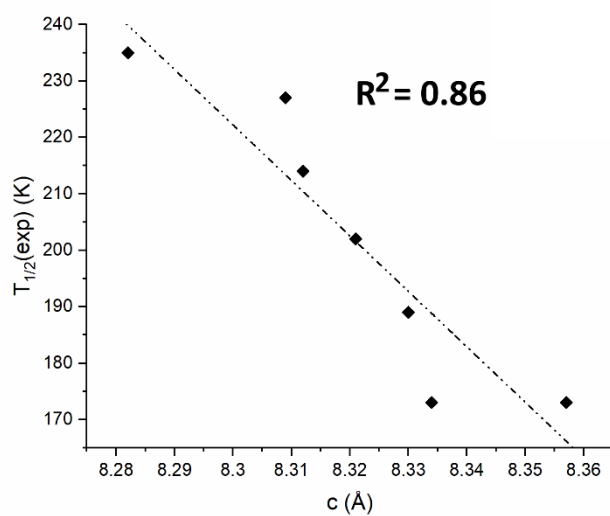

**Figure S20.** Reported correlation factor  $R^2$  for the variation of the length of the c-axis of  $1_{\text{cry,HS}}$  at the increase of the measured  $T_{1/2}$  ( $R^2 = 0.86$ ).

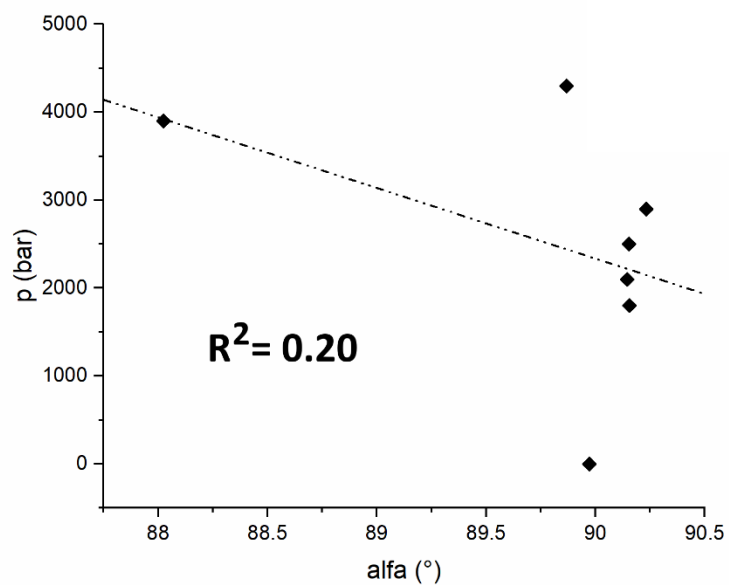

**Figure S21.** Reported correlation factor  $R^2$  for the variation of the magnitude of the  $\alpha$  angle of  $1_{\text{cry,HS}}$  at the pressure increase ( $R^2 = 0.20$ ).

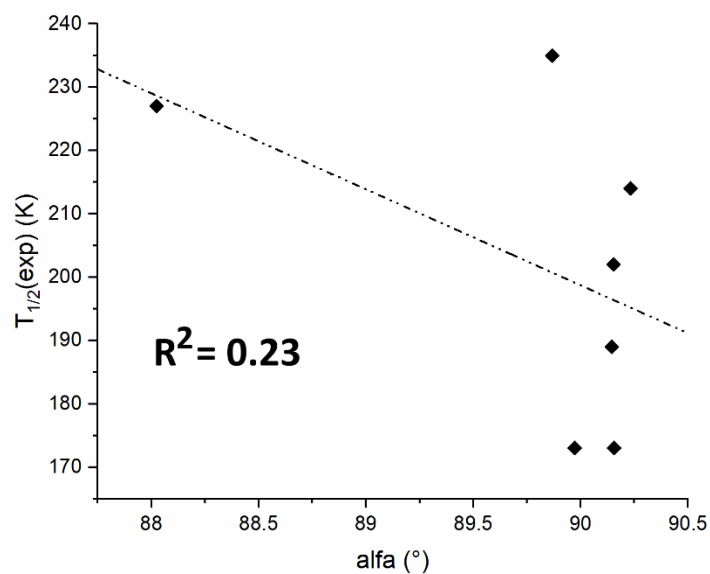

**Figure S22.** Reported correlation factor  $R^2$  for the variation of the magnitude of the  $\alpha$  angle of  $1_{\text{cry,HS}}$  at the increase of the measured  $T_{1/2}$  ( $R^2 = 0.23$ ).

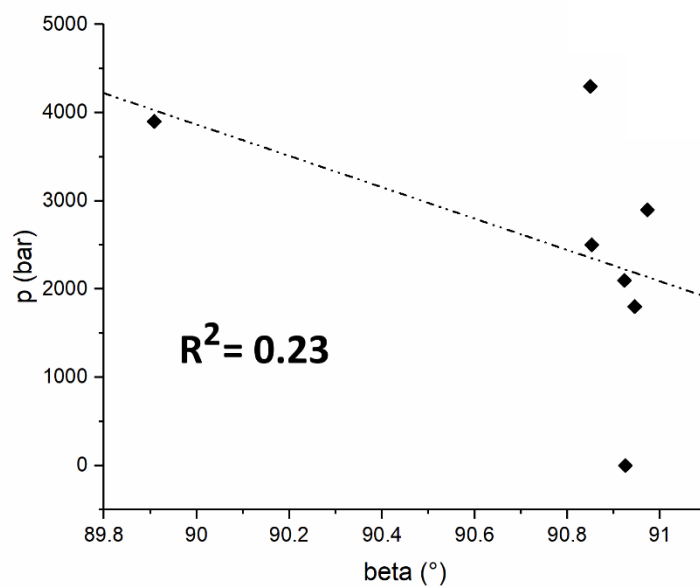

**Figure S23.** Reported correlation factor  $R^2$  for the variation of the magnitude of the  $\beta$  angle of  $1_{\text{cry,HS}}$  at the pressure increase ( $R^2 = 0.23$ ).

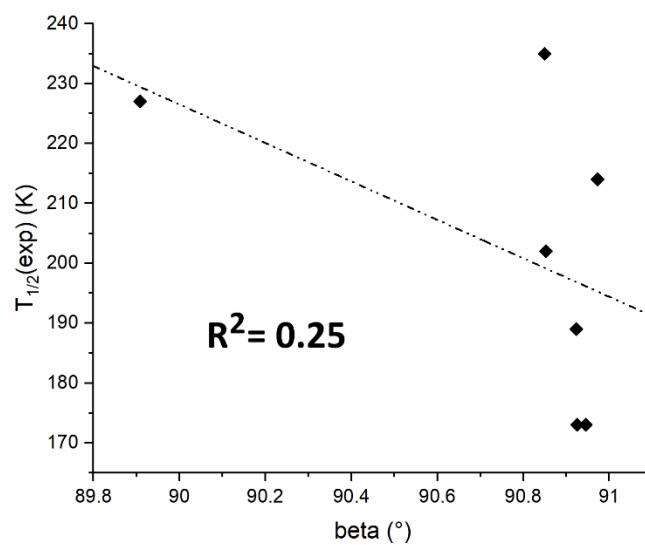

**Figure S24.** Reported correlation factor  $R^2$  for the variation of the magnitude of the  $\beta$  angle of  $1_{\text{cry,HS}}$  at the increase of the measured  $T_{1/2}$  ( $R^2 = 0.25$ ).

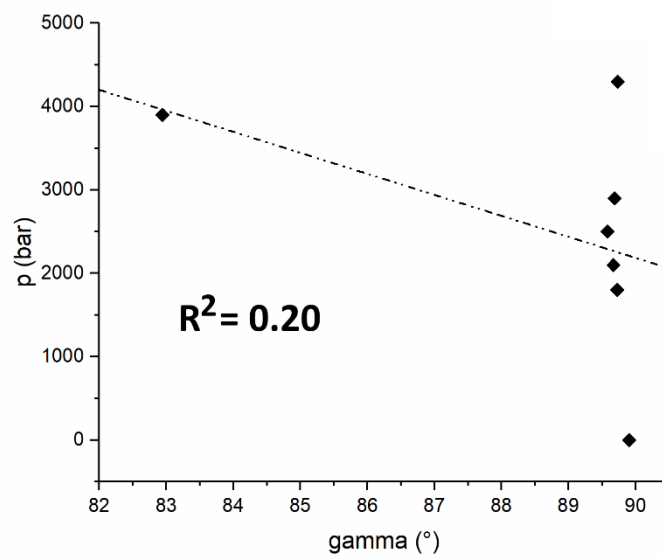

**Figure S25.** Reported correlation factor  $R^2$  for the variation of the magnitude of the  $\gamma$  angle of  $1_{\text{cry,HS}}$  at the pressure increase ( $R^2 = 0.20$ ).

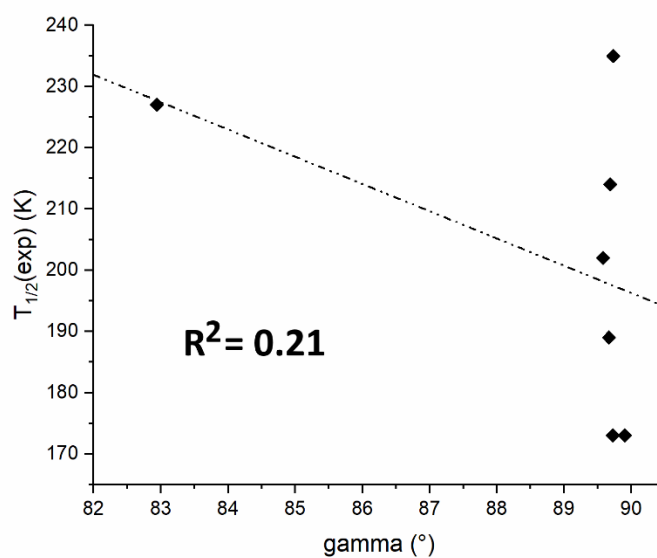

**Figure S26.** Reported correlation factor  $R^2$  for the variation of the magnitude of the  $\gamma$  angle of  $1_{\text{cry,HS}}$  at the increase of the measured  $T_{1/2}$  ( $R^2 = 0.21$ ).

## 2.1. Structural Distortions vs. Pressure

**Table S8.** Reported variation of structural parameters (internal to [Co(dpzca)<sub>2</sub>]: Co-N bond length and  $\Sigma$  octahedral distortion and external: Co-Co intermolecular distance) obtained after procedure of cell optimisation for **1<sub>cr,LS</sub>** at different pressures.

| <b>LS</b>       | <b>Cell Parameters</b> |                    |                    |
|-----------------|------------------------|--------------------|--------------------|
| <b>pressure</b> | <b>Co1-Co2 / Å</b>     | <b>Co2-Co3 / Å</b> | <b>Co3-Co4 / Å</b> |
| 1               | 8.177                  | 10.540             | 8.176              |
| 1800            | 8.171                  | 10.500             | 8.161              |
| 2100            | 8.167                  | 10.499             | 8.157              |
| 2500            | 8.161                  | 10.498             | 8.152              |
| 2900            | 8.127                  | 10.464             | 8.154              |
| 3900            | 8.123                  | 10.455             | 8.133              |
| 4300            | 8.114                  | 10.464             | 8.122              |

**Table S9.** Reported variation of structural parameters (internal to [Co(dpzca)<sub>2</sub>]: Co-N bond length and  $\Sigma$  octahedral distortion and external: Co-Co intermolecular distance) obtained after procedure of cell optimisation for **1<sub>cr,HS</sub>** at different pressures.

| <b>HS</b>       | <b>Cell Parameters</b> |                    |                    |
|-----------------|------------------------|--------------------|--------------------|
| <b>pressure</b> | <b>Co1-Co2 / Å</b>     | <b>Co2-Co3 / Å</b> | <b>Co3-Co4 / Å</b> |
| 1               | 8.057                  | 8.064              | 8.070              |
| 1800            | 8.013                  | 8.072              | 8.062              |
| 2100            | 7.987                  | 8.059              | 8.056              |
| 2500            | 7.991                  | 8.061              | 8.066              |
| 2900            | 8.029                  | 8.018              | 8.200              |
| 3900            | 8.028                  | 8.007              | 8.199              |
| 4300            | 8.028                  | 8.007              | 8.199              |

**Table S10.** Calculated structural distortion parameters for crystallographic and calculated structures (DFT) for 1cryst at different pressures (1, 1800, 2100, 2500, 2900, 3900, 4300 bar), along with the experimental  $T_{1/2}$  from ref<sup>8</sup> and the calculated  $T_{1/2}$ . 1 bar =  $10^{-4}$  Pa.

| Pressure / bar       |                                  | 1             | 4300    | 1        | 1800     | 2100     | 2500     | 2900     | 3900     | 4300     | $R^2$<br>[pressure]  | $R^2$<br>[ $T_{1/2}(exp)$ ] |
|----------------------|----------------------------------|---------------|---------|----------|----------|----------|----------|----------|----------|----------|----------------------|-----------------------------|
| $T_{1/2} (exp) / K$  |                                  | Exp.<br>x-ray |         | 173      | 173      | 189      | 202      | 214      | 218      | 235      |                      |                             |
| $T_{1/2} (calc) / K$ |                                  |               |         | 171      | 164      | 190      | 173      | LS       | LS       | -        |                      |                             |
| $1_{cryst,LS}$       | $RMSD / \text{\AA}$              | -             | -       | -        | 0.03221  | 0.04415  | 0.05004  | 0.06016  | 0.06482  | 0.07082  | <b>0.92</b> (Fig. 6) | <b>0.98</b> (Fig. 6)        |
|                      | $\langle D \rangle / \text{\AA}$ | 2.03444       | 2.0505  | 1.98033  | 1.97843  | 1.98299  | 1.97794  | 1.97733  | 1.97365  | 1.97700  | 0.43 (Fig. S27)      | 0.38 (Fig. S33)             |
|                      | $\zeta / \text{\AA}$             | 0.63404       | 0.4964  | 0.26140  | 0.25693  | 0.26407  | 0.25610  | 0.25331  | 0.23631  | 0.25671  | 0.34 (Fig. S28)      | 0.24 (Fig. S34)             |
|                      | $\Delta (geom.)$                 | 0.00318       | 0.0020  | 0.00057  | 0.00054  | 0.00066  | 0.00054  | 0.00053  | 0.00049  | 0.00057  | 0.07 (Fig. S29)      | 0.09 (Fig. S35)             |
|                      | $\Sigma / ^\circ$                | 76.0830       | 89.8708 | 69.3796  | 69.3845  | 70.5836  | 69.4735  | 69.5518  | 68.0682  | 69.199   | 0.17 (Fig. S30)      | 0.15 (Fig. S36)             |
|                      | $\theta / ^\circ$                | 271.161       | 306.325 | 230.475  | 230.731  | 235.439  | 231.269  | 231.510  | 221.259  | 231.135  | 0.13 (Fig. S31)      | 0.09 (Fig. S37)             |
|                      | $\Omega / ^\circ$                | 127.36        | 143.16  | 126.84   | 119.64   | 130.00   | 126.68   | 126.80   | 117.28   | 127.00   | 0.06 (Fig. S32)      | 1.3E-8 (Fig. S38)           |
| $1_{cryst,HS}$       | $RMSD / \text{\AA}$              | -             | -       | -        | 0.04131  | 0.05112  | 0.05195  | 0.13196  | 0.25527  | 0.33967  | <b>0.95</b> (Fig. 6) | <b>0.78</b> (Fig. 6)        |
|                      | $\langle D \rangle / \text{\AA}$ | 2.11373       | -       | 2.08150  | 2.07902  | 2.07916  | 2.07866  | 2.07788  | 2.07954  | 2.07784  | 0.58 (Fig. S27)      | 0.45 (Fig. S33)             |
|                      | $\zeta / \text{\AA}$             | 0.25709       | -       | 0.13399  | 0.13028  | 0.13310  | 0.13233  | 0.12746  | 0.13108  | 0.13081  | 0.26 (Fig. S28)      | 0.21 (Fig. S34)             |
|                      | $\Delta (geom.)$                 | 0.00046       | -       | 0.00021  | 0.00020  | 0.00021  | 0.00021  | 0.00021  | 0.00021  | 0.00020  | 0.01 (Fig. S29)      | 0.01 (Fig. S38)             |
|                      | $\Sigma / ^\circ$                | 110.620       | -       | 104.228  | 103.785  | 104.296  | 104.171  | 103.966  | 104.442  | 104.045  | 0.01 (Fig. S30)      | 0.03 (Fig. S36)             |
|                      | $\theta / ^\circ$                | 344.334       | -       | 335.121  | 334.596  | 336.809  | 336.455  | 338.072  | 336.264  | 336.287  | 0.22 (Fig. S31)      | 0.36 (Fig. S37)             |
|                      | $\Omega / ^\circ$                | 164.74        | -       | 169.49   | 169.64   | 171.44   | 171.12   | 173.96   | 167.16   | 171.92   | 0.01 (Fig. S32)      | 0.07 (Fig. S38)             |
| $1_{cryst,LS-HS}$    | $\Delta RMSD / \text{\AA}$       | -             | -       | 9.60     | 9.61     | 9.63     | 9.59     | 9.58     | 9.56     | 9.63     | 0.02 (Fig. S42)      | 0.02 (Fig. S43)             |
|                      | $\Delta \theta / ^\circ$         | -             | -       | 104.6461 | 103.8654 | 101.3695 | 105.1858 | 106.5625 | 115.0052 | 105.1516 | 0.60 (Fig. S44)      | 0.22 (Fig. S45)             |

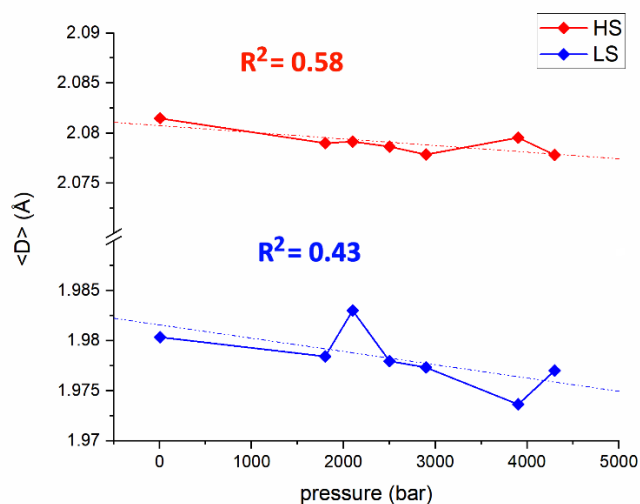

**Figure S27.** Reported effects of the pressure increase vs the average  $\langle D_{\text{Co-N}} \rangle$  distance. Trend line reports the correlation factor for  $1_{\text{cry,HS}}$  (red,  $R^2 = 0.58$ ) and LS  $[\text{Co}(\text{dpzca})_2]$  (blue,  $R^2 = 0.43$ ).

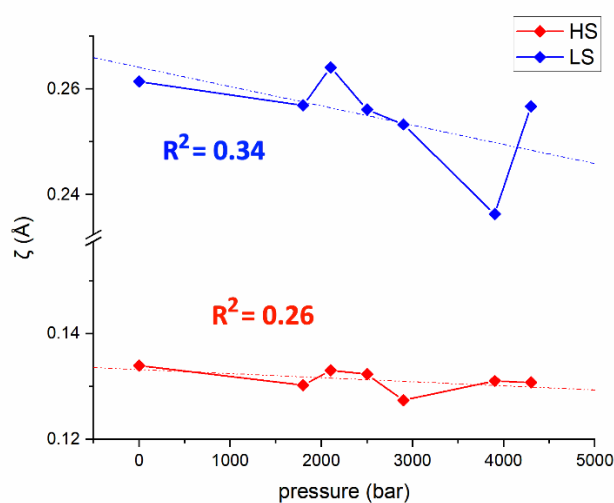

**Figure S28.** Reported effects of the pressure increase vs the sum of the Co-N bond differences from  $\langle D_{\text{Co-N}} \rangle$ ,  $\zeta$ . Trend line reports the correlation factor for  $1_{\text{cry,HS}}$  (red,  $R^2 = 0.26$ ) and  $1_{\text{cry,LS}}$  (blue,  $R^2 = 0.34$ ).

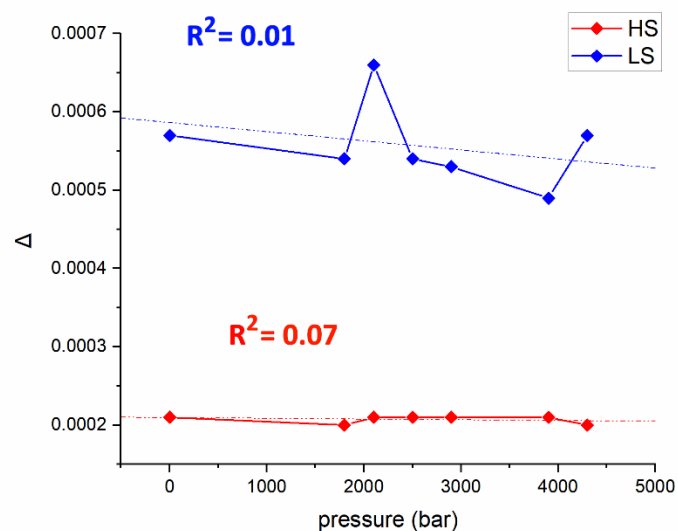

**Figure S29.** Reported effects of the pressure increase vs the averaged Co-N bond deviation from  $\langle D_{Co-N} \rangle$ ,  $\Delta$ . Trend line reports the correlation factor for  $1_{cry,HS}$  (red,  $R^2 = 0.07$ ) and  $1_{cry,LS}$  (blue,  $R^2 = 0.01$ ).

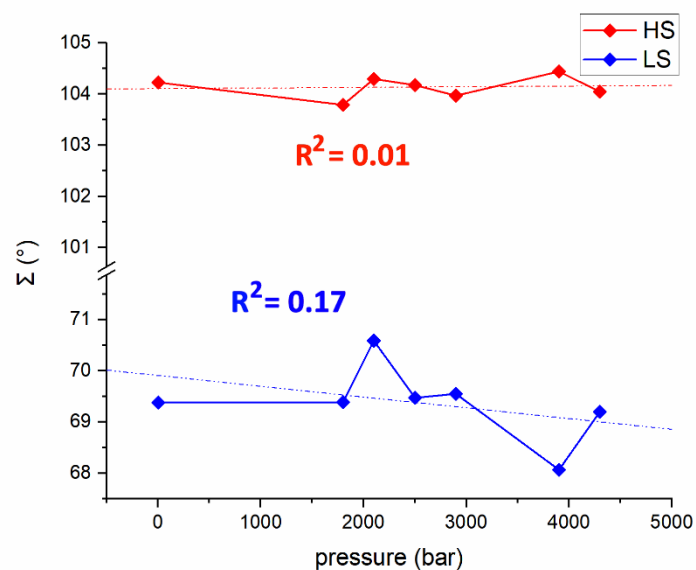

**Figure S30.** Reported effects of the pressure increase vs the octahedral distortion parameter  $\Sigma$ . Trend line reports the correlation factor for  $1_{cry,HS}$  (red,  $R^2 = 0.01$ ) and  $1_{cry,LS}$  (blue,  $R^2 = 0.17$ ).

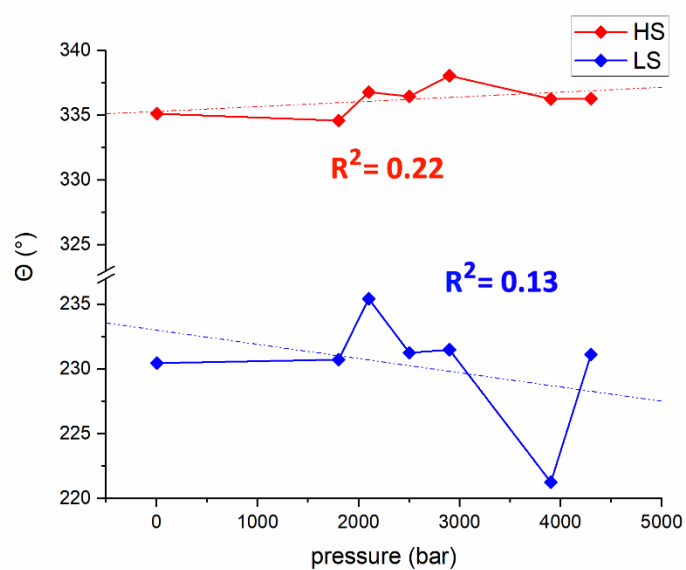

**Figure S31.** Reported effects of the pressure increase vs the trigonal torsion parameter  $\Theta$ . Trend line reports the correlation factor for  $1_{cry,HS}$  (red,  $R^2 = 0.22$ ) and  $1_{cry,LS}$  (blue,  $R^2 = 0.13$ ).

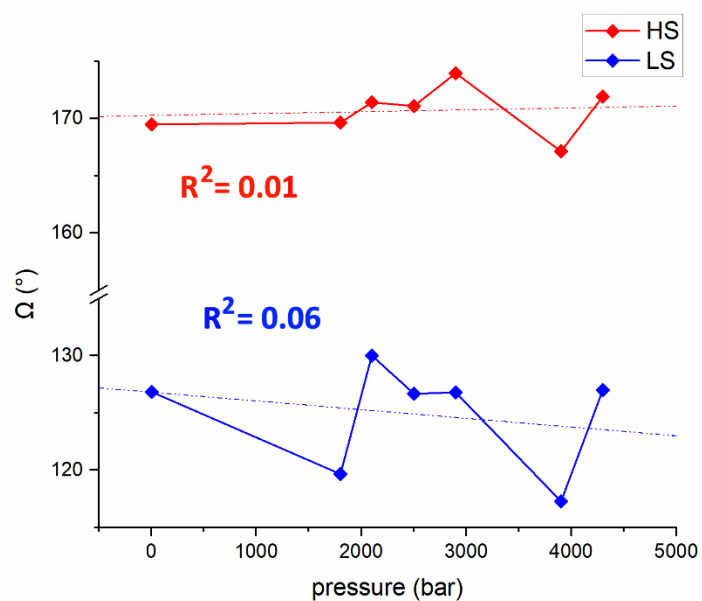

**Figure S32.** Reported effects of the pressure increase vs the distortion parameter  $\Omega$ . Trend line reports the correlation factor for  $1_{cry,HS}$  (red,  $R^2 = 0.01$ ) and  $1_{cry,LS}$  (blue,  $R^2 = 0.06$ ).

## 2.2. Structural Distortions vs. Measured $T_{1/2}$

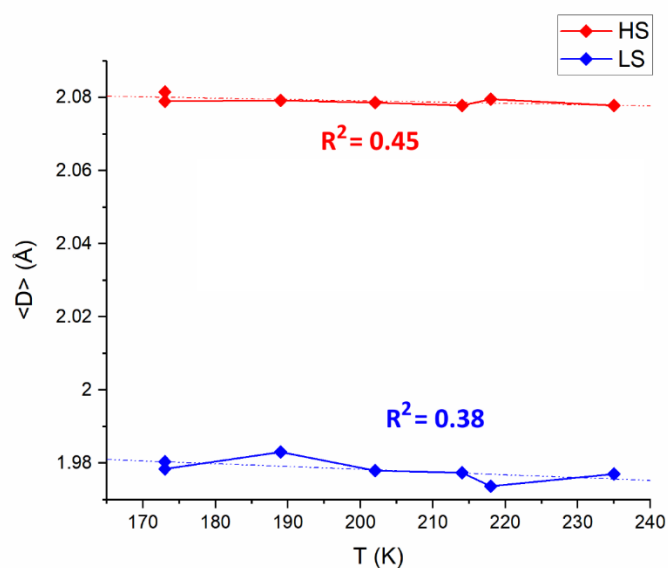

**Figure S33.** Reported effects of the measured  $T_{1/2}$  values at pressure increase vs the vs the average  $\langle D_{\text{Co-N}} \rangle$  distance. Trend line reports the correlation factor for  $1_{\text{cry,HS}}$  (red,  $R^2 = 0.45$ ) and  $1_{\text{cry,LS}}$  (blue,  $R^2 = 0.38$ ).

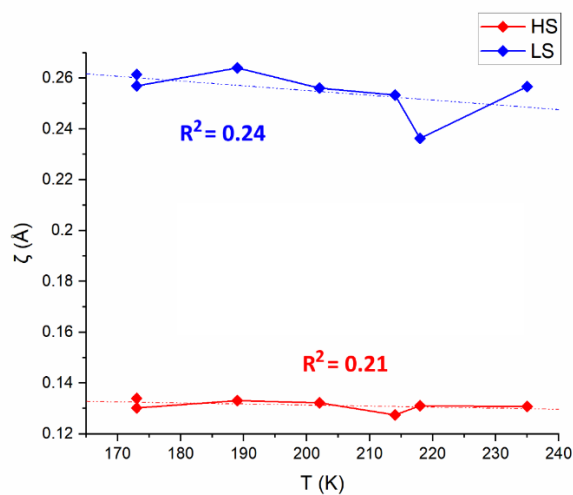

**Figure S34.** Reported effects of the measured  $T_{1/2}$  values at pressure increase vs the sum of the Co-N bond differences from  $\langle D_{\text{Co-N}} \rangle$ ,  $\zeta$ . Trend line reports the correlation factor for  $1_{\text{cry,HS}}$  (red,  $R^2 = 0.21$ ) and  $1_{\text{cry,LS}}$  (blue,  $R^2 = 0.24$ ).

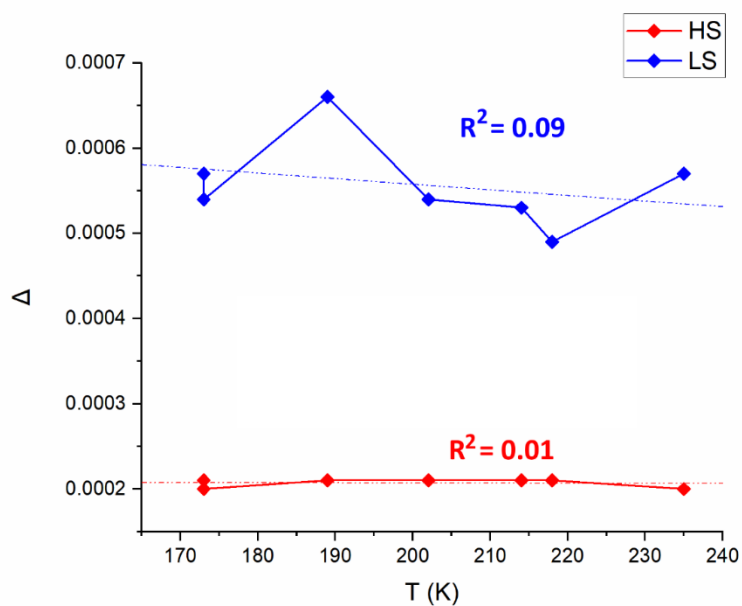

**Figure S35.** Reported effects of the measured  $T_{1/2}$  values at pressure increase vs the averaged Co-N bond deviation from  $\langle D_{Co-N} \rangle$ ,  $\Delta$ . Trend line reports the correlation factor for  $1_{cry,HS}$  (red,  $R^2 = 0.01$ ) and  $1_{cry,LS}$  (blue,  $R^2 = 0.09$ ).

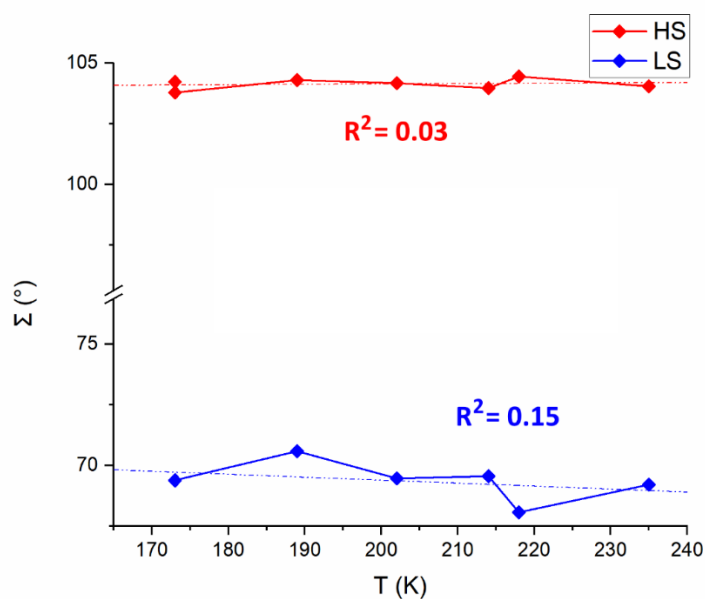

**Figure S36.** Reported effects of the measured  $T_{1/2}$  values at pressure increase vs the octahedral distortion parameter  $\Sigma$ . Trend line reports the correlation factor for  $1_{cry,HS}$  (red,  $R^2 = 0.03$ ) and  $1_{cry,LS}$  (blue,  $R^2 = 0.15$ ).

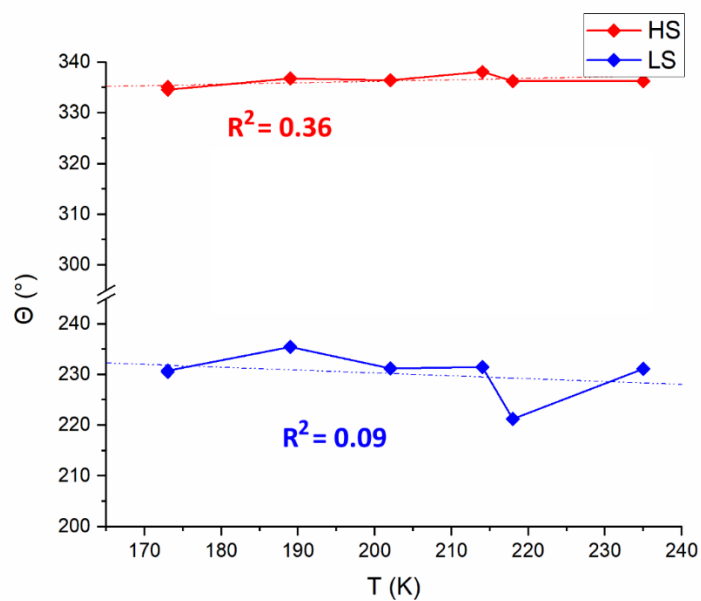

**Figure S37.** Reported effects of the measured  $T_{1/2}$  values at pressure increase vs the trigonal torsion parameter  $\Theta$ . Trend line reports the correlation factor for  $1_{cry,HS}$  (red,  $R^2 = 0.95$ ) and  $1_{cry,LS}$  (blue,  $R^2 = 0.92$ ).

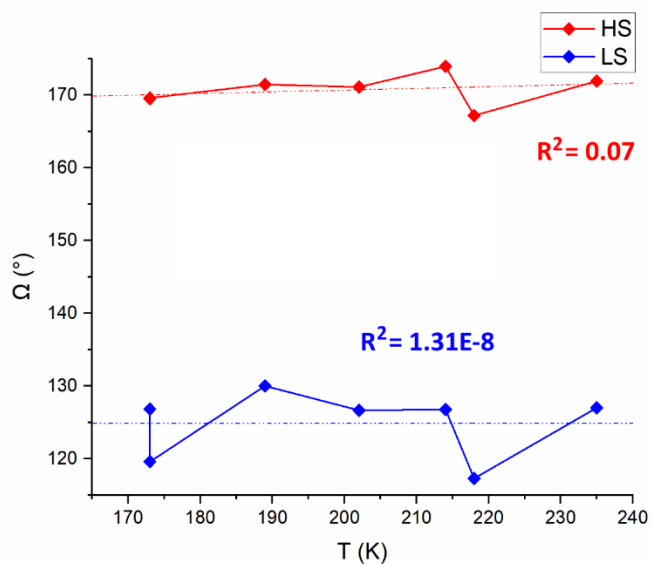

**Figure S38.** Reported effects of the  $T_{1/2}$  values at pressure increase vs the distortion parameter  $\Omega$ . Trend line reports the correlation factor for  $1_{cry,HS}$  (red,  $R^2 = 0.07$ ) and  $1_{cry,LS}$  (blue,  $R^2 = 1.13E-8$ ).

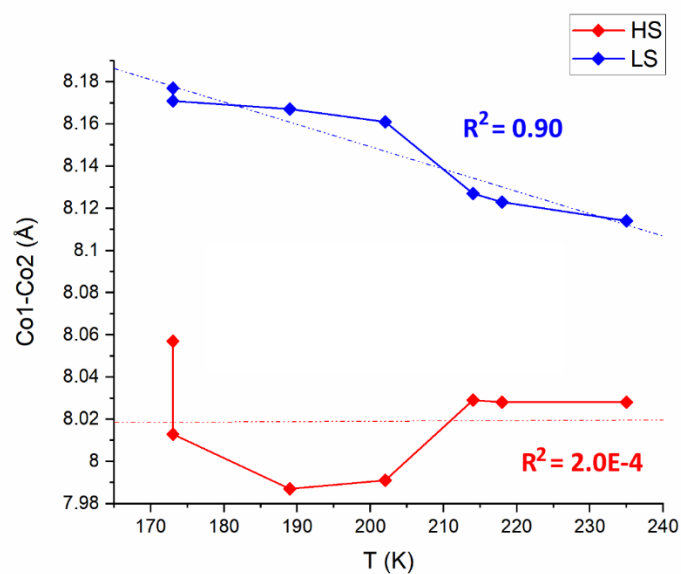

**Figure S39.** Reported effects of the measured  $T_{1/2}$  values at pressure increase vs the intermolecular Co-Co ions distance ( $d(\text{Co1-Co2})$ ). Trend line reports the correlation factor for  $1_{\text{cry,HS}}$  (red,  $R^2 = 2.0E-4$ ) and  $1_{\text{cry,LS}}$  (blue,  $R^2 = 0.90$ ).

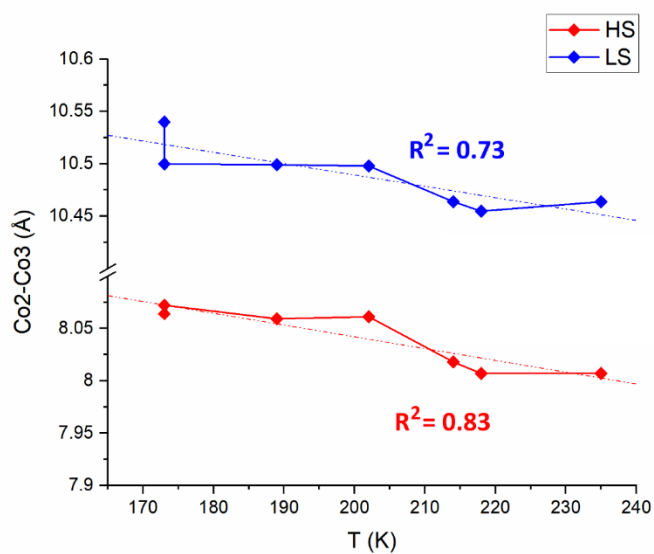

**Figure S40.** Reported effects of the measured  $T_{1/2}$  values at pressure increase vs the intermolecular Co-Co ions distance ( $d(\text{Co2-Co3})$ ). Trend line reports the correlation factor for  $1_{\text{cry,HS}}$  (red,  $R^2 = 0.83$ ) and  $1_{\text{cry,LS}}$  (blue,  $R^2 = 0.73$ ).

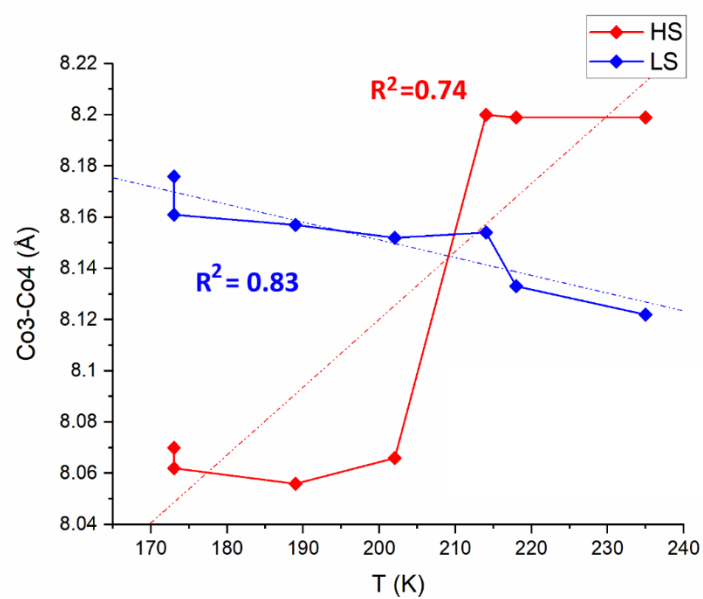

**Figure S41.** Reported effects of the measured  $T_{1/2}$  values at pressure increase vs the intermolecular Co-Co ions distance ( $d(\text{Co3-Co4})$ ). Trend line reports the correlation factor for  $1_{\text{cry,HS}}$  (red,  $R^2 = 0.74$ ) and  $1_{\text{cry,LS}}$  (blue,  $R^2 = 0.83$ ).

## 2.3. Structural Distortions associated with Spin State Transition

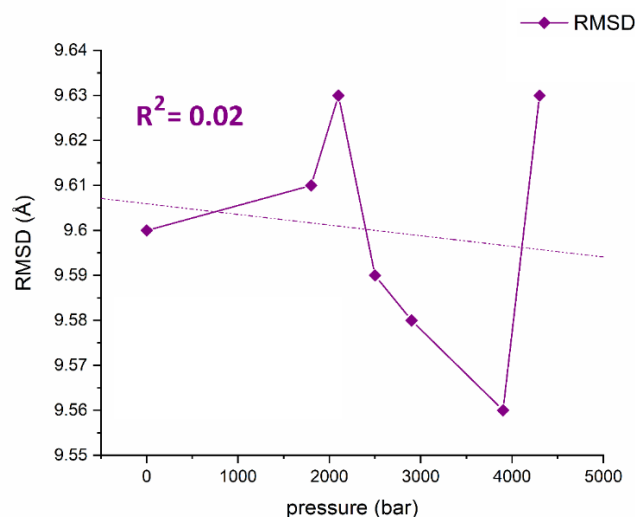

**Figure S42.** Reported effects of the pressure increase vs the  $\Delta\text{RMSD}$  variation from  $1_{\text{cry,LS}}$  to  $1_{\text{cry,HS}}$ . Trend line reports the  $[p \text{ vs } \Delta\text{RMSD}]$  correlation factor (purple,  $R^2 = 0.02$ ).

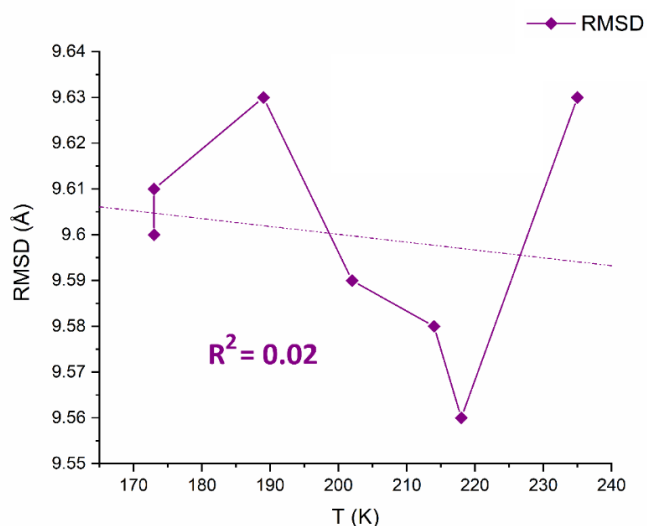

**Figure S43.** Reported effects of the measured  $T_{1/2}$  at the pressure increase vs the  $\Delta\text{RMSD}$  variation from  $1_{\text{cry,LS}}$  to  $1_{\text{cry,HS}}$ . Trend line reports the  $[T_{1/2} \text{ vs } \Delta\text{RMSD}]$  correlation factor (purple,  $R^2 = 0.02$ ).

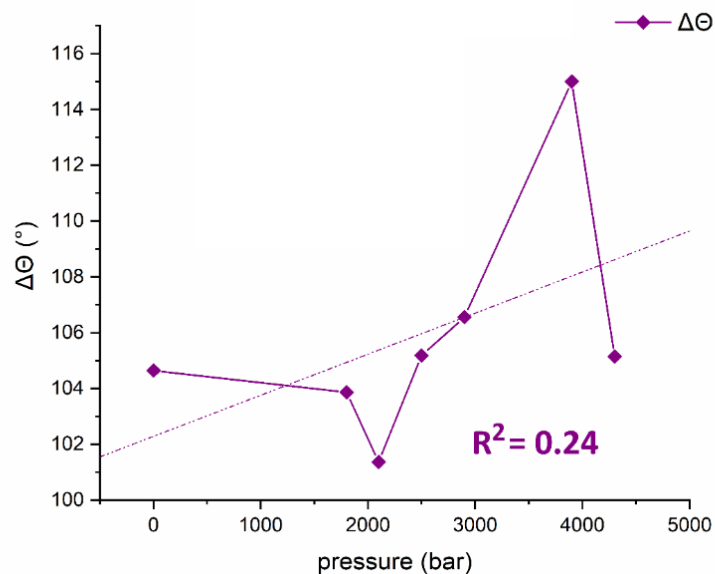

**Figure S44.** Reported effects of the pressure increase vs the variation of the trigonal torsion parameter  $\Delta\Theta$  from  $1_{\text{cry,LS}}$  to  $1_{\text{cry,HS}}$ . Trend line reports the  $[p \text{ vs. } \Delta\Theta]$  correlation factor (purple,  $R^2 = 0.24$ ).

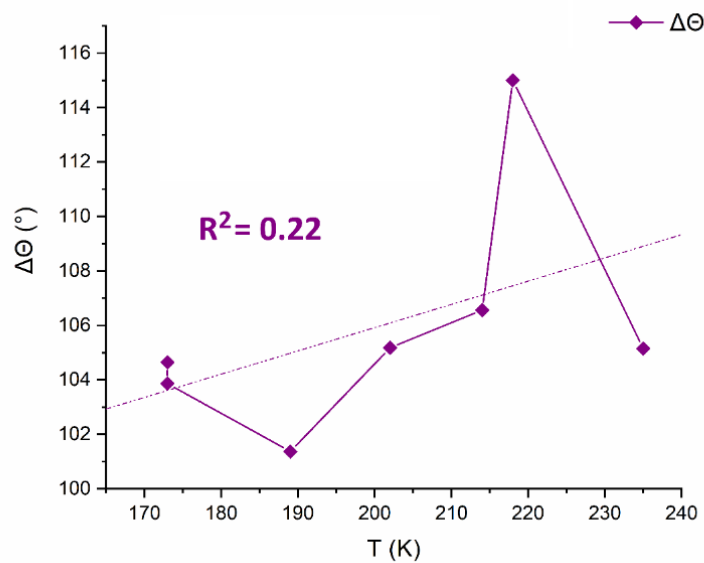

**Figure S45.** Reported effects of the measured  $T_{1/2}$  at the pressure increase vs the variation of the trigonal torsion parameter  $\Delta\Theta$  from  $1_{\text{cry,LS}}$  to  $1_{\text{cry,HS}}$ . Trend line reports the  $[T_{1/2} \text{ vs. } \Delta\Theta]$  correlation factor (purple,  $R^2 = 0.22$ ).

### 3. Additional Electronic Data

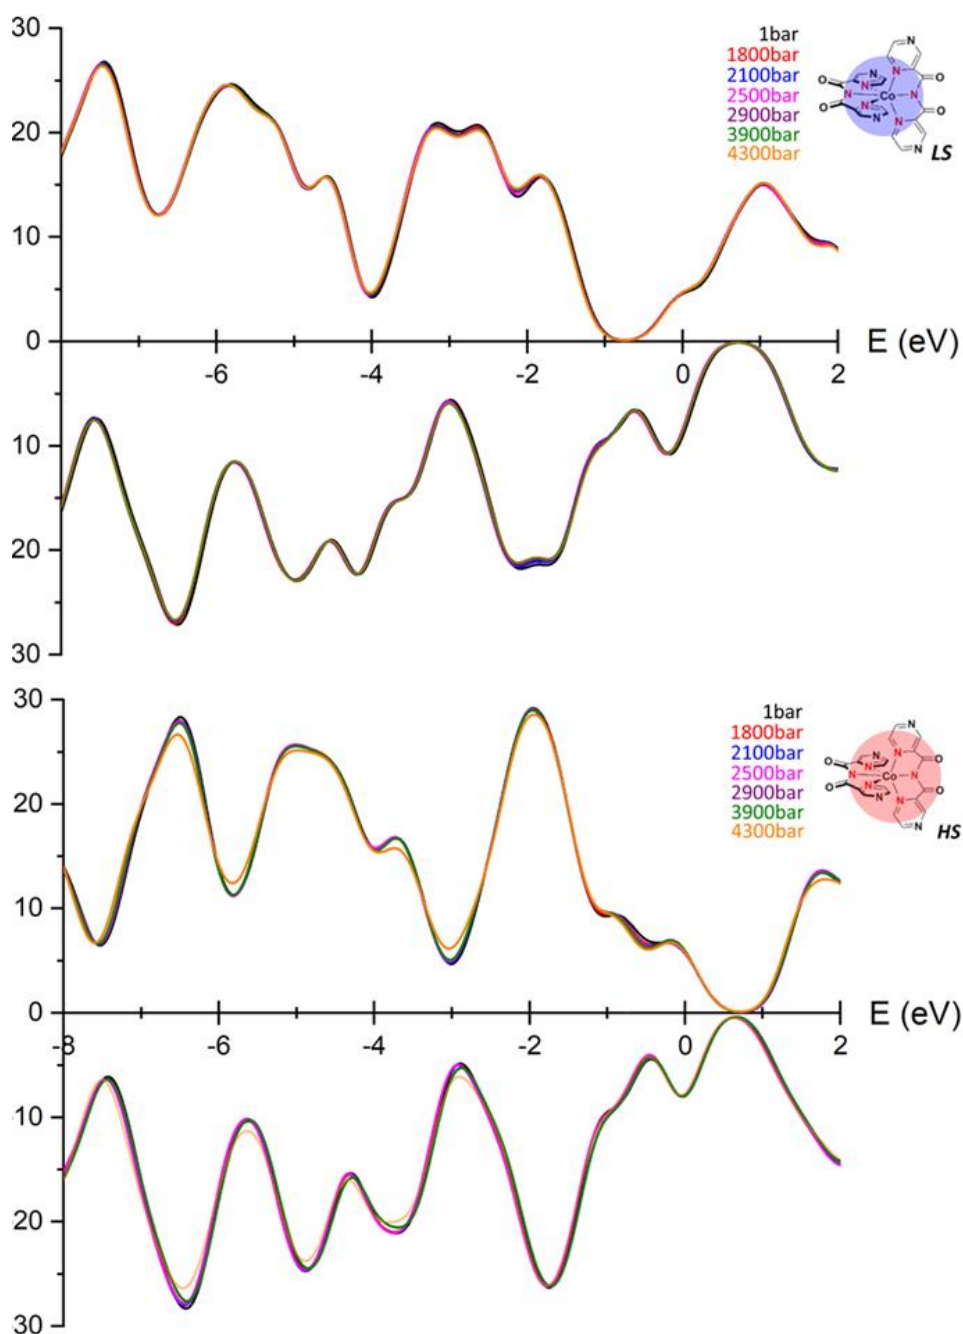

**Figure S46.** Calculated PDOS for  $1_{\text{cryst,LS}}$  (top) and  $1_{\text{cryst,HS}}$  (bottom) across the whole pressure range ( $1 \text{ bar} < p < 4300 \text{ bar}$ ) in the energy range between  $-8 \text{ eV}$  and  $+2 \text{ eV}$ . For each spin state are reported  $\alpha$ - (+y axis) and  $\beta$ -orbitals (-y axis). Colour code: 1 bar (black), 1800 bar (red), 2100 bar (blue), 2500 bar (magenta), 2900 bar (purple), 3900 bar (olive), 4300 bar (orange).  $1 \text{ bar} = 10^{-4} \text{ Pa}$ .

**Table S11.** Reported correlation factor in the analysis of the variation of twelve characteristic peaks for TDOS and LDOS of  $1_{\text{cry,LS}}$  and to  $1_{\text{cry,HS}}$  versus the seven different pressures (and related experimental  $T_{1/2}$ ).

| $p / \text{bar}$<br>$T_{1/2}(\text{exp.}) / \text{K}$ |        |             | 1     | 1800  | 2100  | 2500  | 2900  | 3900  | 4300  | $R^2(\text{p})$ | $R^2$<br>( $T_{1/2}(\text{exp})$ ) |
|-------------------------------------------------------|--------|-------------|-------|-------|-------|-------|-------|-------|-------|-----------------|------------------------------------|
| DOS                                                   | Figure | Energy / eV | 173   | 173   | 189   | 202   | 214   | 227   | 235   |                 |                                    |
| Intensities                                           |        |             |       |       |       |       |       |       |       |                 |                                    |
| 1.LS_ TDOS                                            | 7      | -1.9        | 25.34 | 25.23 | 24.96 | 24.67 | 24.62 | 24.57 | 24.04 | 0.84 (Fig. S47) | 0.92 (Fig. S59)                    |
| 2.LS_ TDOS                                            | 7      | -2.6        | 42.13 | 41.54 | 41.45 | 41.38 | 41.34 | 41.12 | 40.92 | 0.97 (Fig. S48) | 0.74 (Fig. S60)                    |
| 3.LS_ TDOS                                            | 7      | -3.1        | 42.44 | 41.91 | 41.81 | 41.74 | 41.76 | 41.51 | 41.46 | 0.97 (Fig. S49) | 0.74 (Fig. S61)                    |
| 4.LS_ PDOS( $\alpha$ )                                | S46    | -2.1        | 13.89 | 14.21 | 14.31 | 14.32 | 14.53 | 14.55 | 14.65 | 0.97 (Fig. S50) | 0.84 (Fig. S62)                    |
| 5.LS_ PDOS( $\alpha$ )                                | S46    | -2.6        | 20.73 | 20.53 | 20.42 | 20.42 | 20.38 | 20.35 | 20.24 | 0.97 (Fig. S51) | 0.81 (Fig. S63)                    |
| 6.LS_ PDOS( $\alpha$ )                                | S46    | -3.2        | 20.93 | 20.67 | 20.67 | 20.61 | 20.63 | 20.46 | 20.41 | 0.97 (Fig. S52) | 0.76 (Fig. S64)                    |
| 7.LS_ PDOS( $\beta$ )                                 | S46    | -2.1        | 21.76 | 21.57 | 21.48 | 21.42 | 21.41 | 21.19 | 21.19 | 0.98 (Fig. S53) | 0.89 (Fig. S65)                    |
| 8.HS_ TDOS                                            | 7      | -0.5        | 11.27 | 10.73 | 10.52 | 10.44 | 10.63 | 10.65 | 10.15 | 0.75 (Fig. S54) | 0.52 (Fig. S66)                    |
| 9.HS_ TDOS                                            | 7      | -0.7        | 14.89 | 14.14 | 13.91 | 13.85 | 13.82 | 13.68 | 13.18 | 0.93 (Fig. S55) | 0.73 (Fig. S67)                    |
| 10.HS_ TDOS                                           | 7      | -1.9        | 54.78 | 54.66 | 54.63 | 54.58 | 54.45 | 54.45 | 54.21 | 0.86 (Fig. S56) | 0.87 (Fig. S68)                    |
| 11.HS_ PDOS( $\alpha$ )                               | S46    | -0.7        | 8.05  | 7.67  | 7.49  | 7.431 | 7.26  | 7.26  | 6.94  | 0.94 (Fig. S57) | 0.84 (Fig. S69)                    |
| 12.HS_ PDOS( $\alpha$ )                               | S46    | -2.0        | 29.17 | 29.10 | 29.07 | 29.04 | 28.97 | 28.97 | 28.56 | 0.64 (Fig. S58) | 0.68 (Fig. S70)                    |

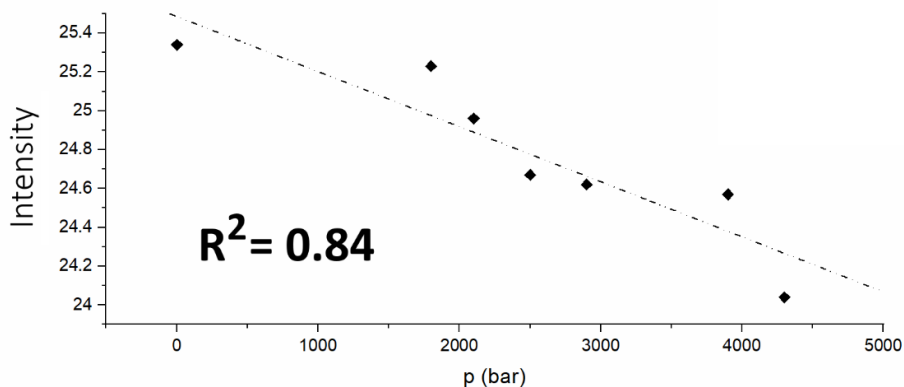

**Figure S47.** Reported Intensity of the band of  $1_{\text{cry,LS}}$  at -1.9 eV (1.LS\_TDOS, Table S11) vs the pressure increase. Trend line reports the  $[I \text{ vs. } p]$  correlation factor ( $R^2 = 0.84$ ).

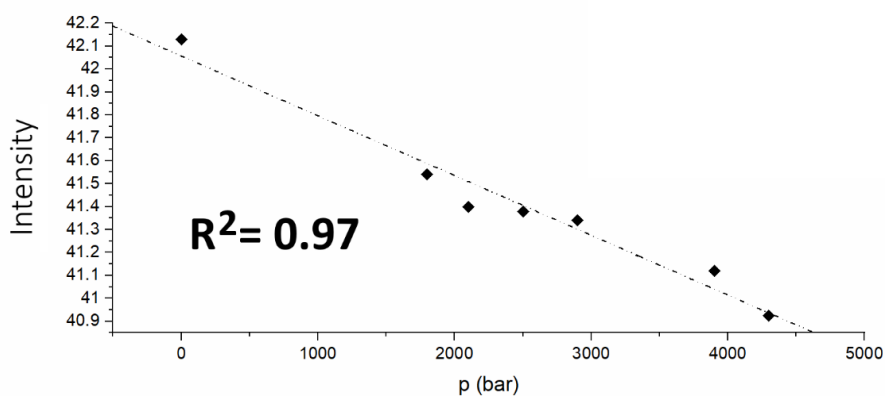

**Figure S48.** Reported Intensity of the band of  $1_{\text{cry,LS}}$  at -2.6 eV (2.LS\_TDOS, Table S11) vs the pressure increase. Trend line reports the  $[I \text{ vs. } p]$  correlation factor ( $R^2 = 0.97$ ).

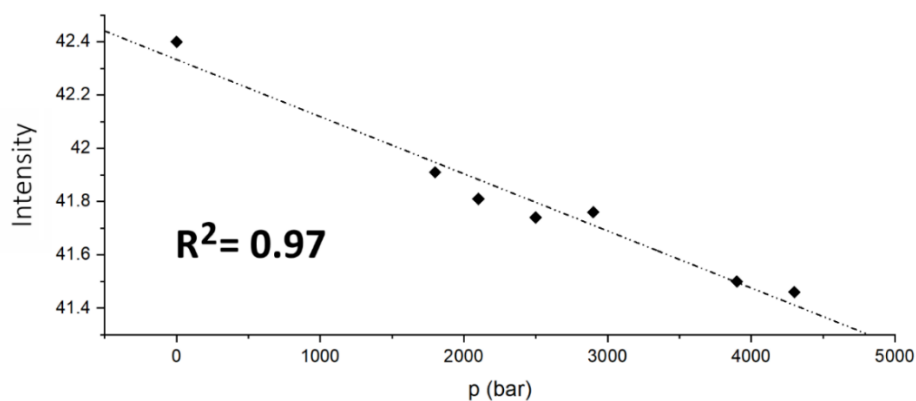

**Figure S49.** Reported Intensity of the band of  $1_{\text{cry,LS}}$  at -3.1 eV (3.LS\_TDOS, Table S11) vs the pressure increase. Trend line reports the  $[I \text{ vs. } p]$  correlation factor ( $R^2 = 0.97$ ).

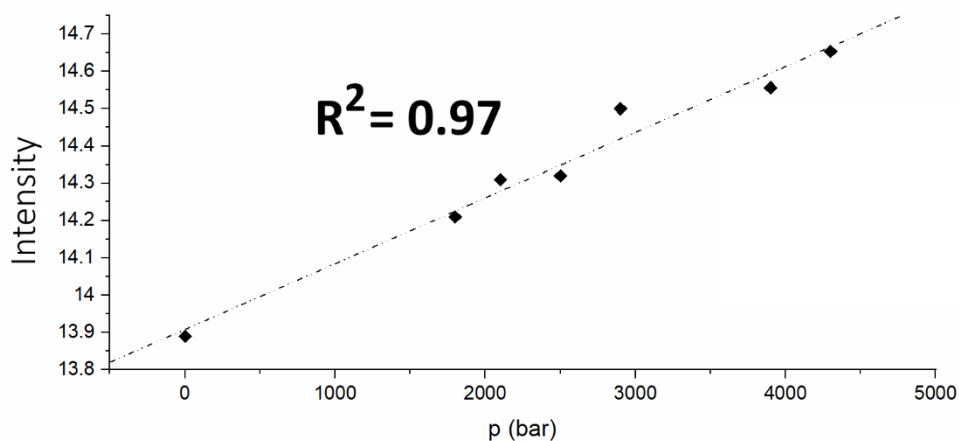

**Figure S50.** Reported Intensity of the band of  $1_{\text{cry,LS}}$  at -2.1 eV (4.LS\_PDOS( $\alpha$ ), Table S11) vs the pressure increase. Trend line reports the [I vs. p] correlation factor ( $R^2 = 0.97$ ).

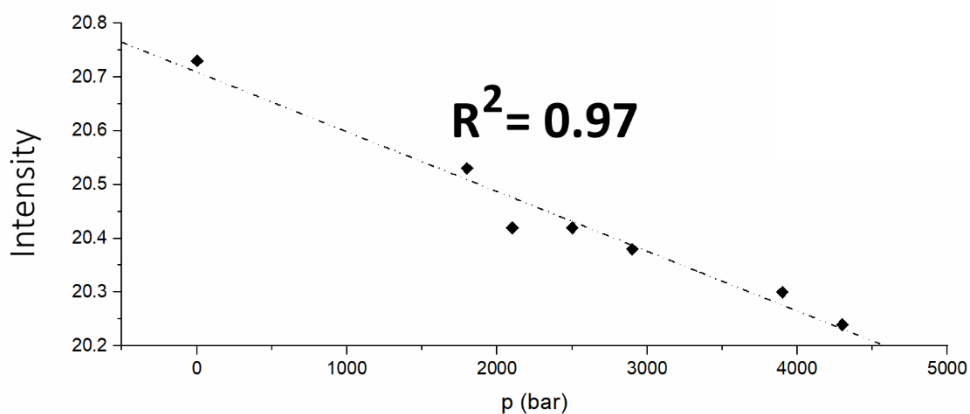

**Figure S51.** Reported Intensity of the band of  $1_{\text{cry,LS}}$  at -2.6 eV (5.LS\_PDOS( $\alpha$ ), Table S11) vs the pressure increase. Trend line reports the [I vs. p] correlation factor ( $R^2 = 0.97$ ).

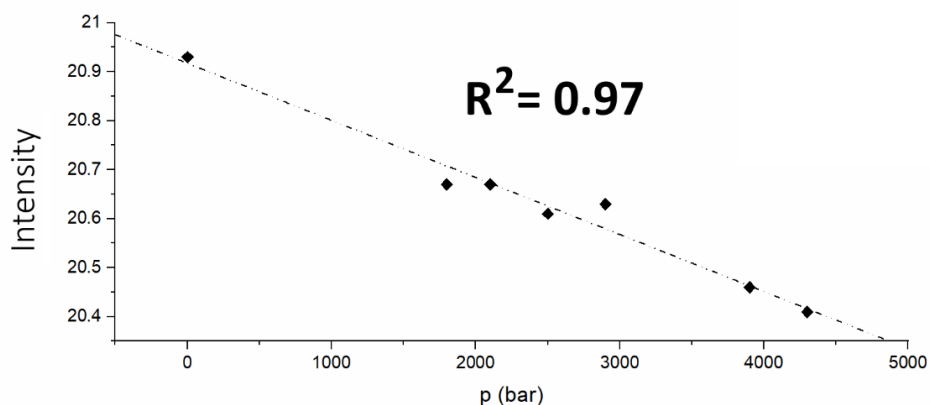

**Figure S52.** Reported Intensity of the band of  $1_{\text{cry,LS}}$  at -3.2 eV (6.LS\_PDOS( $\alpha$ ), Table S11) vs the pressure increase. Trend line reports the [I vs. p] correlation factor ( $R^2 = 0.97$ ).

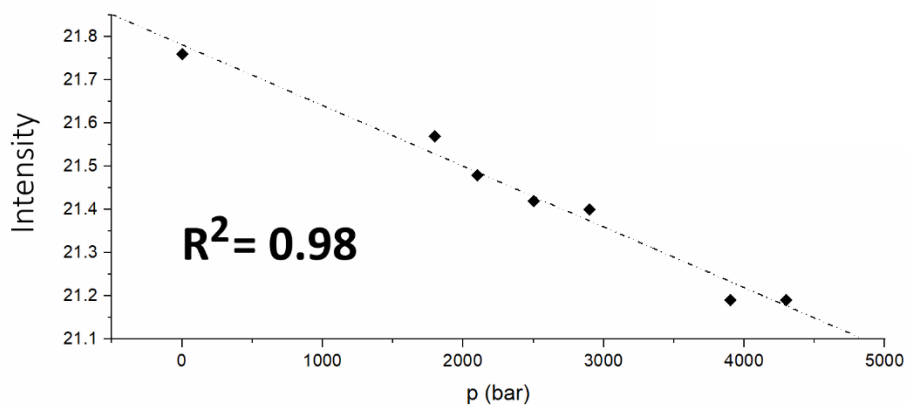

**Figure S53.** Reported Intensity of the band of  $1_{\text{cry,LS}}$  at -2.1 eV (7.LS\_PDOS( $\beta$ ), Table S11) vs the pressure increase. Trend line reports the  $[I \text{ vs. } p]$  correlation factor ( $R^2 = 0.98$ ).

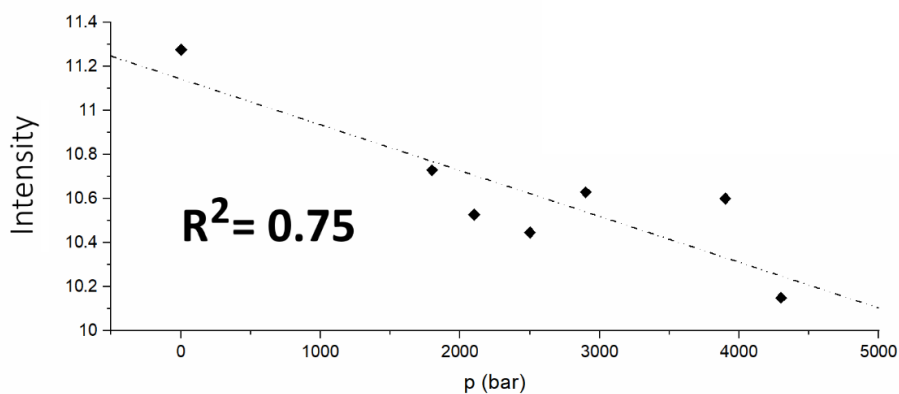

**Figure S54.** Reported Intensity of the band of  $1_{\text{cry,HS}}$  at -0.5 eV (8.HS\_TDOS, Table S11) vs the pressure increase. Trend line reports the  $[I \text{ vs. } p]$  correlation factor ( $R^2 = 0.75$ ).

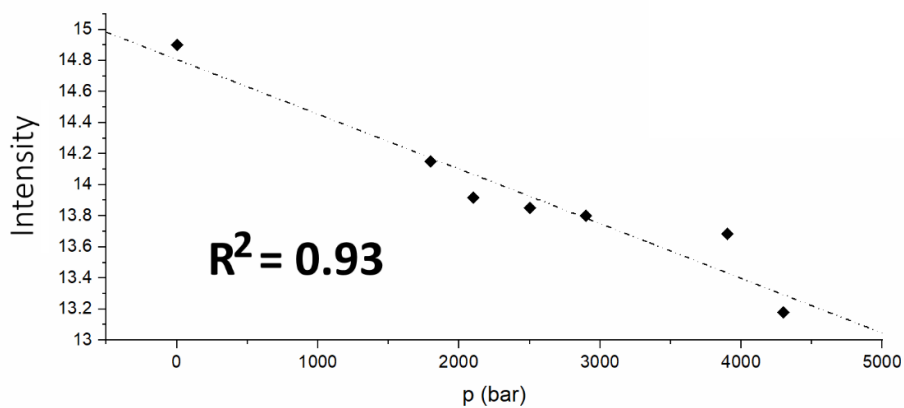

**Figure S55.** Reported Intensity of the band of  $1_{\text{cry,HS}}$  at -0.7 eV (9.HS\_TDOS, Table S11) vs the pressure increase. Trend line reports the  $[I \text{ vs. } p]$  correlation factor ( $R^2 = 0.93$ ).

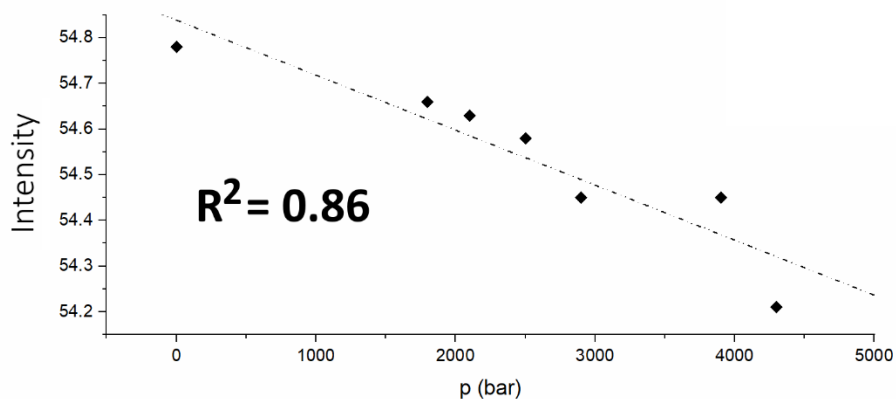

**Figure S56.** Reported Intensity of the band of  $1_{\text{cry,HS}}$  at -1.9 eV (10.HS\_TDOS, Table S11) vs the pressure increase. Trend line reports the  $[I \text{ vs. } p]$  correlation factor ( $R^2 = 0.86$ ).

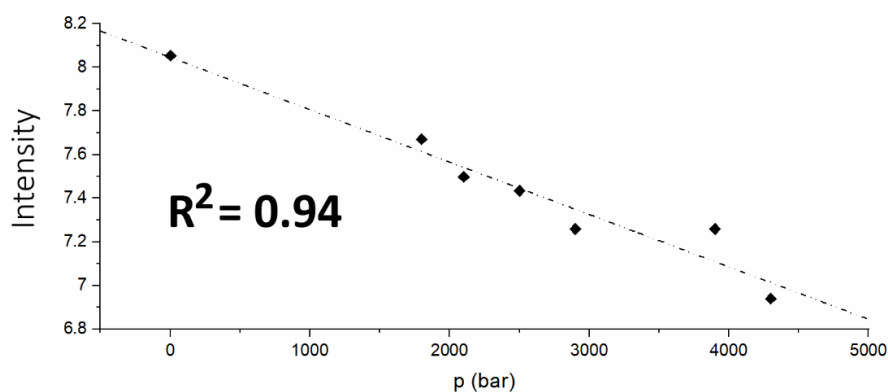

**Figure S57.** Reported Intensity of the band of  $1_{\text{cry,HS}}$  at -0.7 eV (11.HS\_PDOS( $\alpha$ ), Table S11) vs the pressure increase. Trend line reports the  $[I \text{ vs. } p]$  correlation factor ( $R^2 = 0.94$ ).

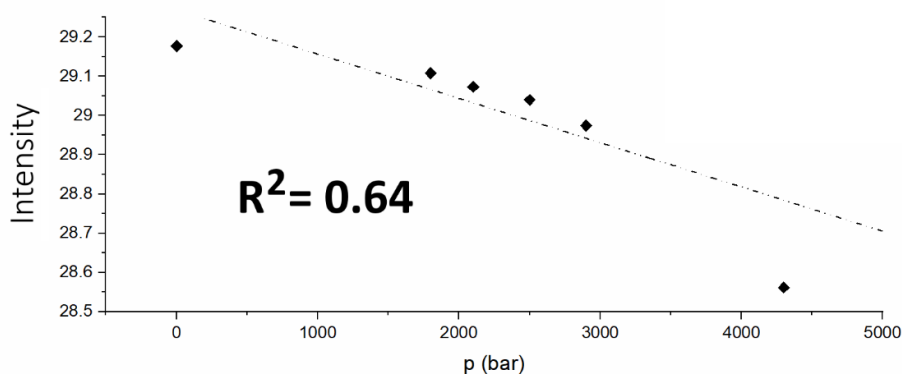

**Figure S58.** Reported Intensity of the band of  $1_{\text{cry,HS}}$  at -2.0 eV (12.HS\_PDOS( $\alpha$ ), Table S11) vs the pressure increase. Trend line reports the  $[I \text{ vs. } p]$  correlation factor ( $R^2 = 0.64$ ).

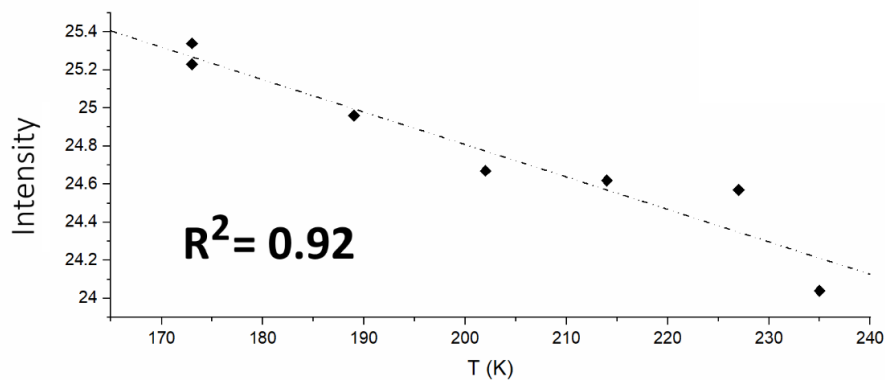

**Figure S59.** Reported Intensity of the band of  $1_{\text{cry,LS}}$  at -1.9 eV (1.LS\_TDOS, Table S11) vs the measured  $T_{1/2}$ . Trend line reports the  $[I \text{ vs. } T_{1/2}]$  correlation factor ( $R^2 = 0.92$ ).

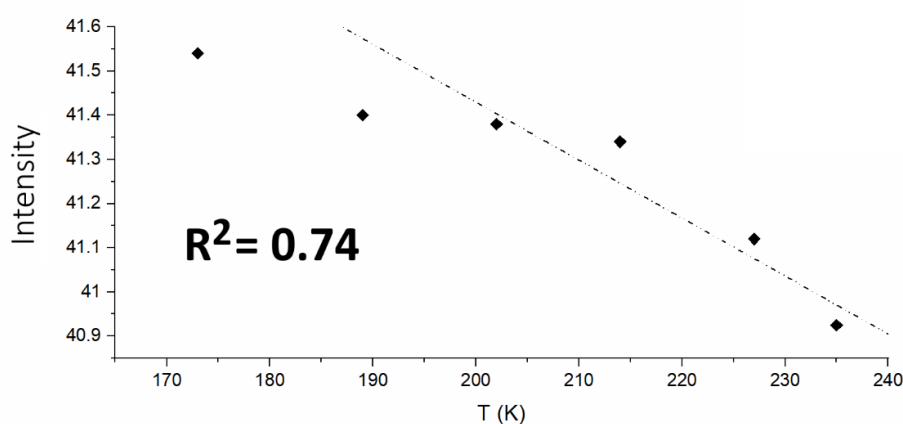

**Figure S60.** Reported Intensity of the band of  $1_{\text{cry,LS}}$  at -2.6 eV (2.LS\_TDOS, Table S11) vs the measured  $T_{1/2}$ . Trend line reports the  $[I \text{ vs. } T_{1/2}]$  correlation factor ( $R^2 = 0.74$ ).

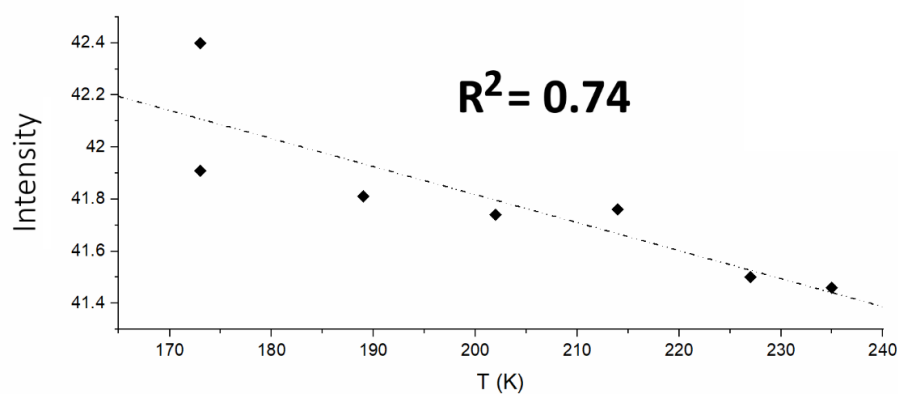

**Figure S61.** Reported Intensity of the band of  $1_{\text{cry,LS}}$  at -3.1 eV (3.LS\_TDOS, Table S11) vs the measured  $T_{1/2}$ . Trend line reports the  $[I \text{ vs. } T_{1/2}]$  correlation factor ( $R^2 = 0.74$ ).

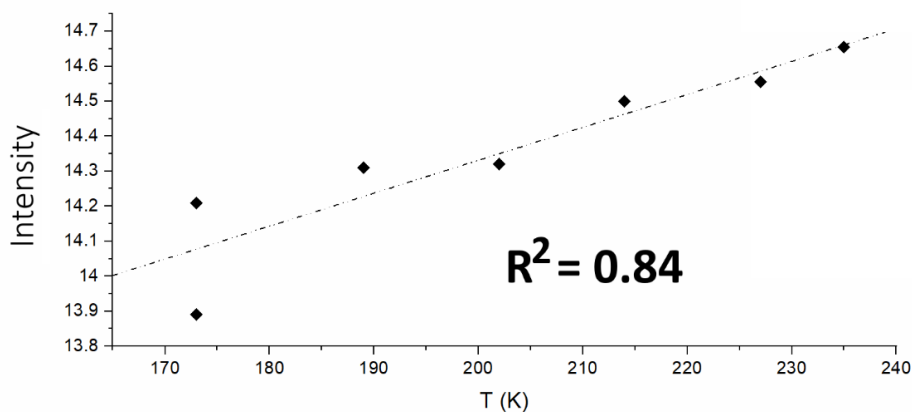

**Figure S62.** Reported Intensity of the band of  $1_{cry,LS}$  at -2.1 eV (4.LS\_PDOS( $\alpha$ ), Table S11) vs the measured  $T_{1/2}$ . Trend line reports the  $[I \text{ vs. } T_{1/2}]$  correlation factor ( $R^2 = 0.84$ )

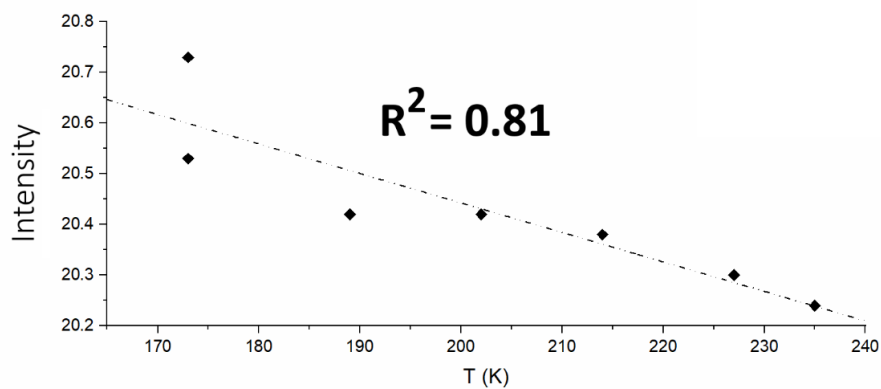

**Figure S63.** Reported Intensity of the band of  $1_{cry,LS}$  at -2.6 eV (5.LS\_PDOS( $\alpha$ ), Table S11) vs the measured  $T_{1/2}$ . Trend line reports the  $[I \text{ vs. } T_{1/2}]$  correlation factor ( $R^2 = 0.81$ ).

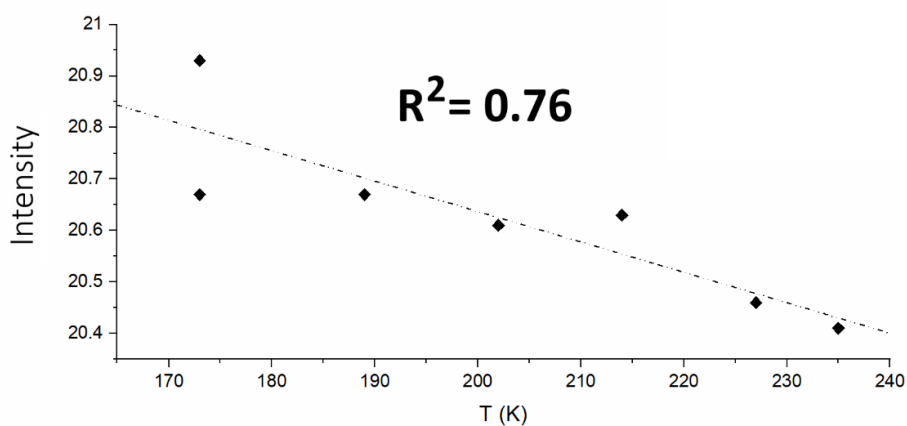

**Figure S64.** Reported Intensity of the band of  $1_{cry,LS}$  at -3.2 eV (6.LS\_PDOS( $\alpha$ ), Table S11) vs the measured  $T_{1/2}$ . Trend line reports the  $[I \text{ vs. } T_{1/2}]$  correlation factor ( $R^2 = 0.76$ ).

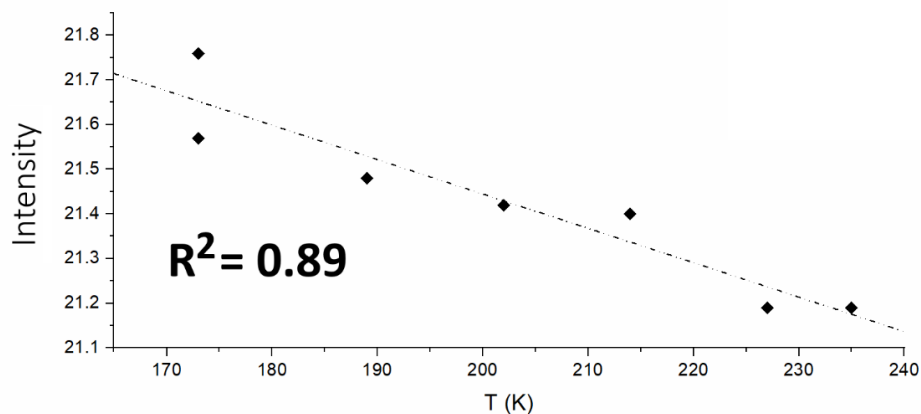

**Figure S65.** Reported Intensity of the band of  $1_{cry,LS}$  at -2.1 eV (7.LS\_PDOS( $\beta$ ), Table S11) vs the measured  $T_{1/2}$ . Trend line reports the [ $I$  vs.  $T_{1/2}$ ] correlation factor ( $R^2 = 0.89$ ).

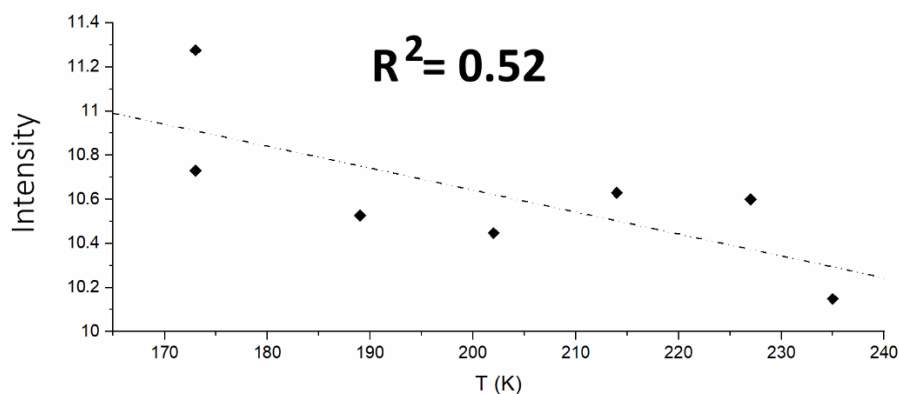

**Figure S66.** Reported Intensity of the band of  $1_{cry,HS}$  at -0.5 eV (8.HS\_TDOS, Table S11) vs the measured  $T_{1/2}$ . Trend line reports the [ $I$  vs.  $T_{1/2}$ ] correlation factor ( $R^2 = 0.52$ ).

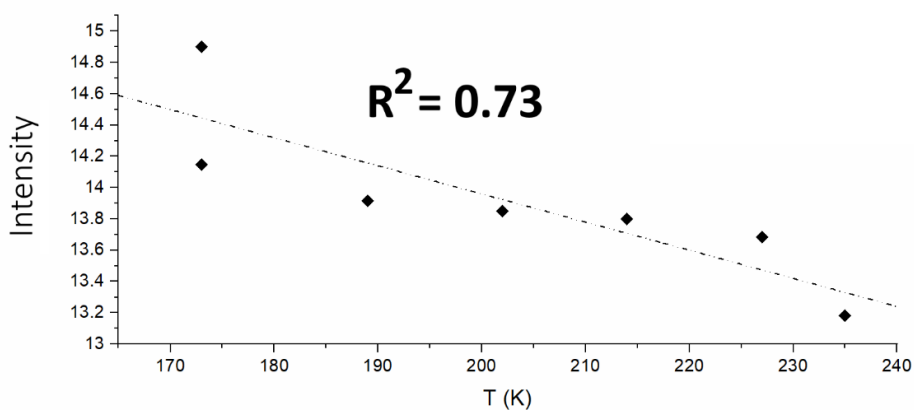

**Figure S67.** Reported Intensity of the band of  $1_{cry,HS}$  at -0.7 eV (9.HS\_TDOS, Table S11) vs the measured  $T_{1/2}$ . Trend line reports the [ $I$  vs.  $T_{1/2}$ ] correlation factor ( $R^2 = 0.73$ ).

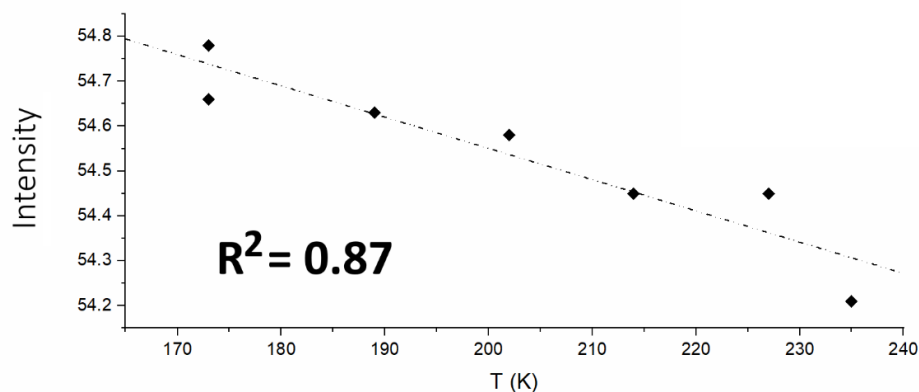

**Figure S68.** Reported Intensity of the band of  $1_{\text{cry,HS}}$  at -1.9 eV (10.HS\_TDOS, Table S11) vs the measured  $T_{1/2}$ . Trend line reports the  $[I \text{ vs. } T_{1/2}]$  correlation factor ( $R^2 = 0.87$ ).

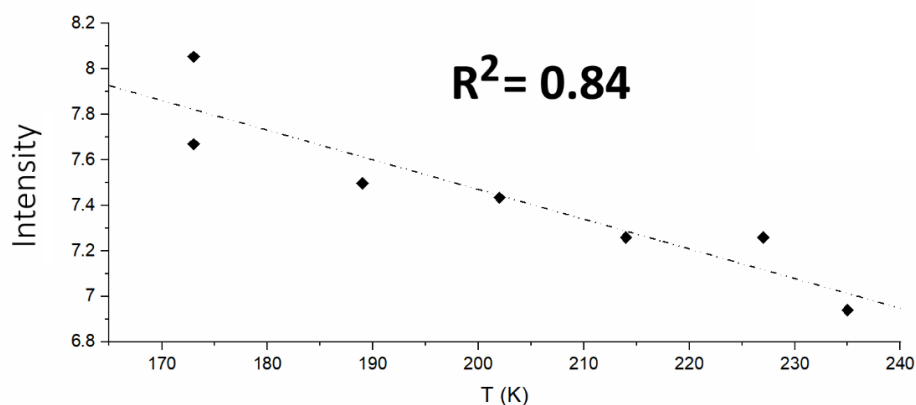

**Figure S69.** Reported Intensity of the band of  $1_{\text{cry,HS}}$  at -0.7 eV (11.HS\_PDOS( $\alpha$ ), Table S11) vs the measured  $T_{1/2}$ . Trend line reports the  $[I \text{ vs. } T_{1/2}]$  correlation factor ( $R^2 = 0.84$ ).

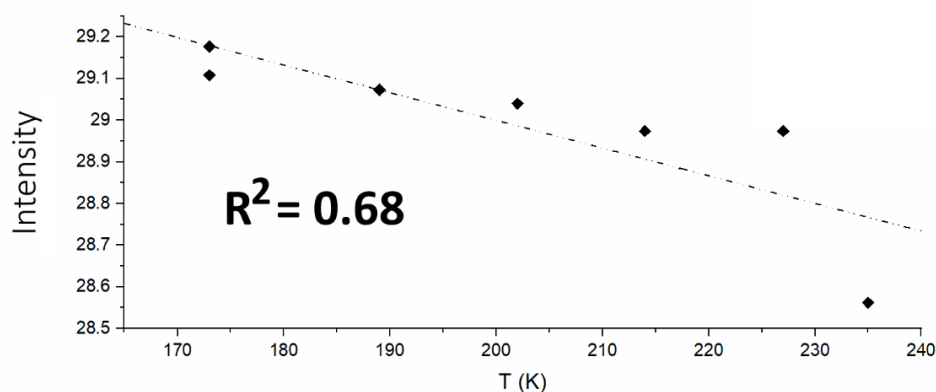

**Figure S70.** Reported Intensity of the band of  $1_{\text{cry,HS}}$  at -2.0 eV (12.HS\_PDOS( $\alpha$ ), Table S11) vs the measured  $T_{1/2}$ . Trend line reports the  $[I \text{ vs. } T_{1/2}]$  correlation factor ( $R^2 = 0.68$ ).

### 3.1. LDOS: Cobalt Atoms

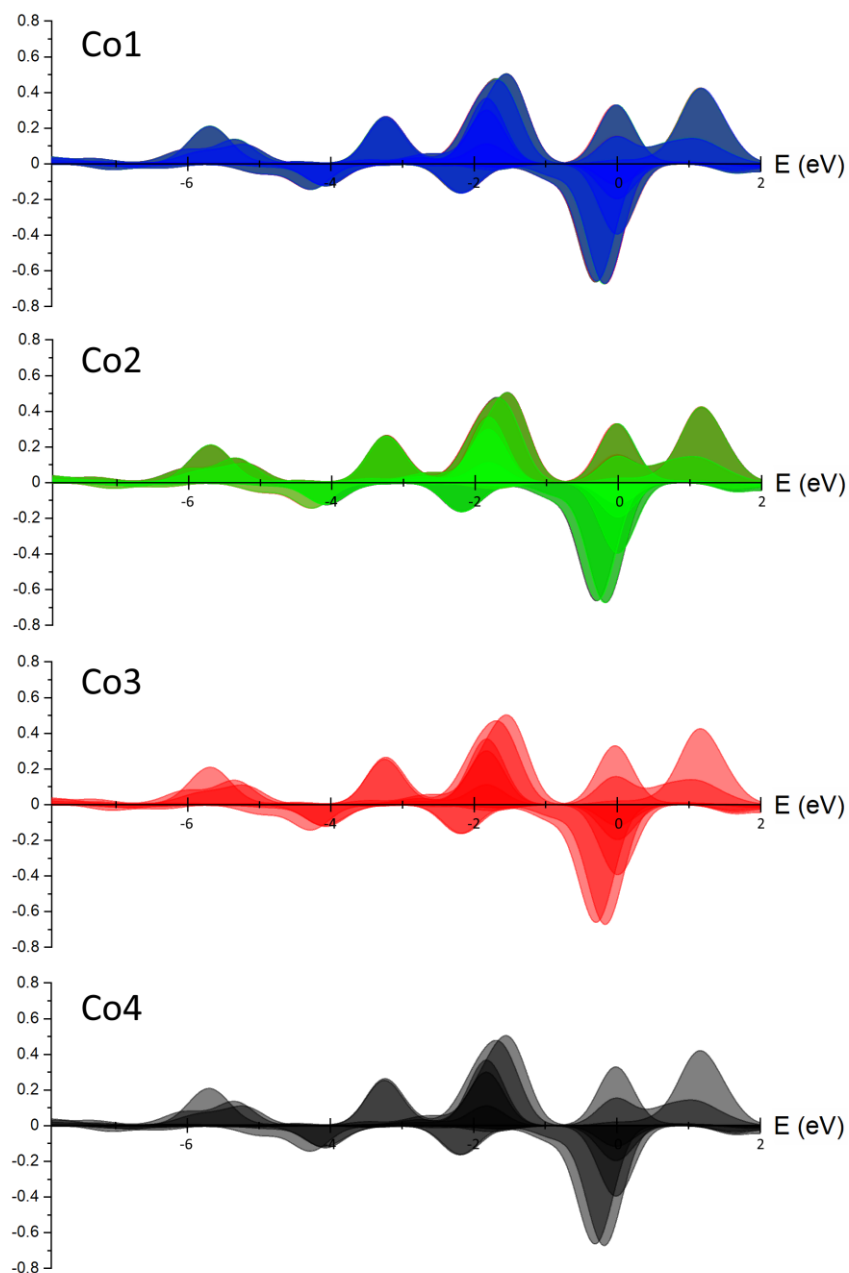

**Figure S71.** Reported LDOS of the four  $\text{Co}^{\text{II}}$  ions for  $1_{\text{cry,LS}}$  at the pressure of 1 bar in the energy range between -8 eV and +2 eV. For each spin state are reported  $\alpha$ - (+y axis) and  $\beta$ -orbitals (-y axis). Colour code: first  $\text{Co}^{\text{II}}$  (blue), second  $\text{Co}^{\text{II}}$  ion (green), third  $\text{Co}^{\text{II}}$  (red), fourth  $\text{Co}^{\text{II}}$  (black).

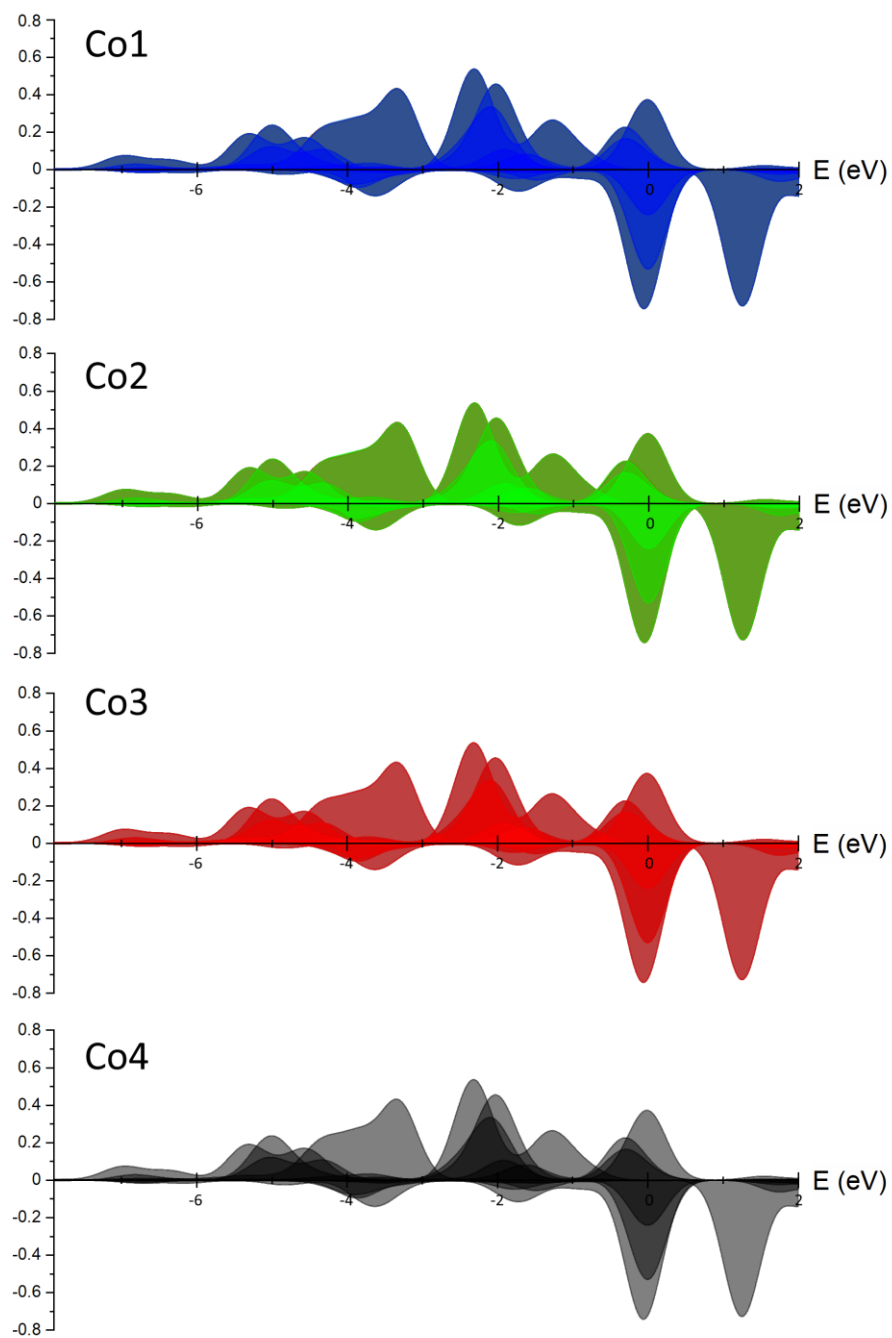

**Figure S72.** Reported LDOS of the four  $\text{Co}^{\text{II}}$  ions for  $\mathbf{1}_{\text{cry,HS}}$  at the pressure of 1 bar in the energy range between -8 eV and +2 eV. For each spin state are reported  $\alpha$ - (+y axis) and  $\beta$ -orbitals (-y axis). Colour code: first  $\text{Co}^{\text{II}}$  (blue), second  $\text{Co}^{\text{II}}$  ion (green), third  $\text{Co}^{\text{II}}$  (red), fourth  $\text{Co}^{\text{II}}$  (black).

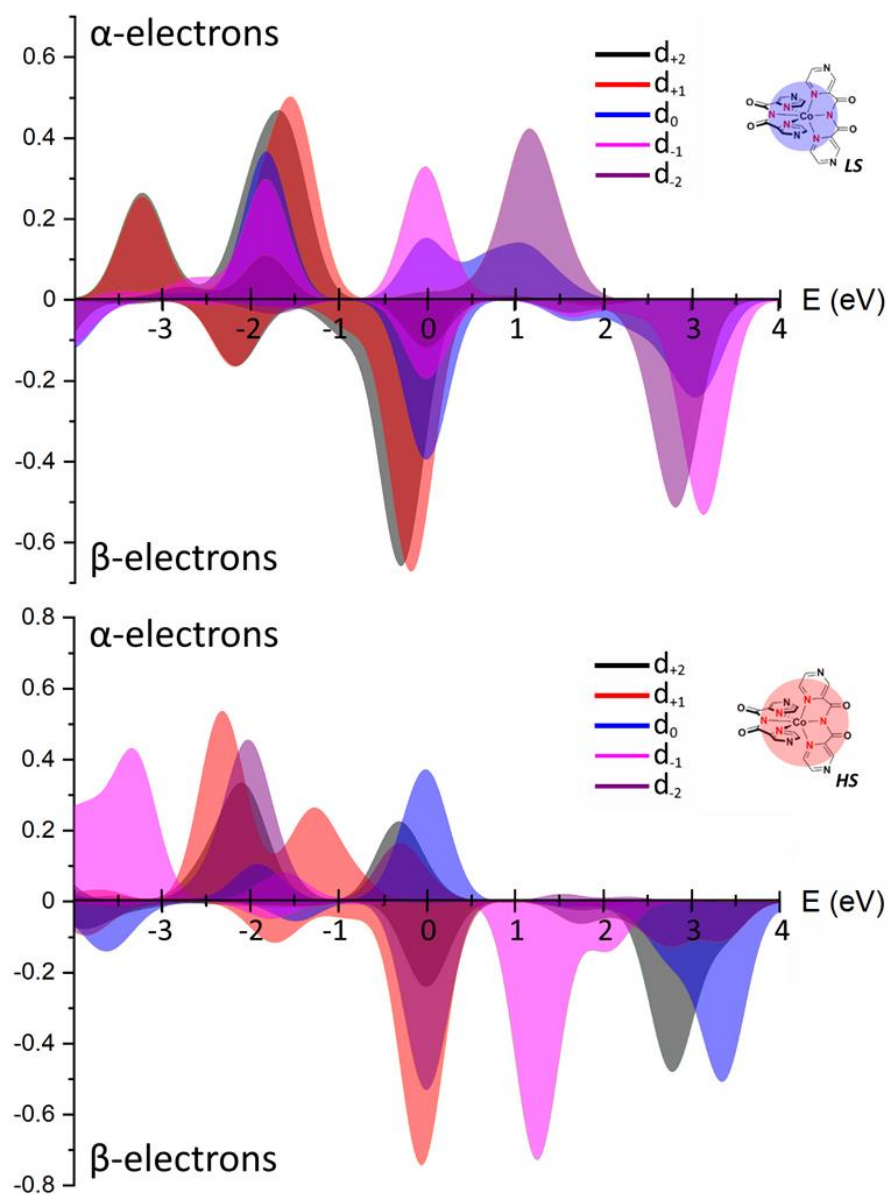

**Figure S73.** Calculated energy of the five d-orbitals represented by complex functions ( $m_l = -2, -1, 0, +1, +2$ ) for  $1_{\text{cry,LS}}$  (top) and  $1_{\text{cry,HS}}$  (bottom) in the energy range between -4 eV and +4 eV. For each spin state the  $\alpha$ - (+y axis) and  $\beta$ -orbitals (-y axis) are reported. Colour code:  $d_{+2}$  (black),  $d_{+1}$  (red),  $d_0$  (blue),  $d_{-1}$  (magenta),  $d_{-2}$  (purple).

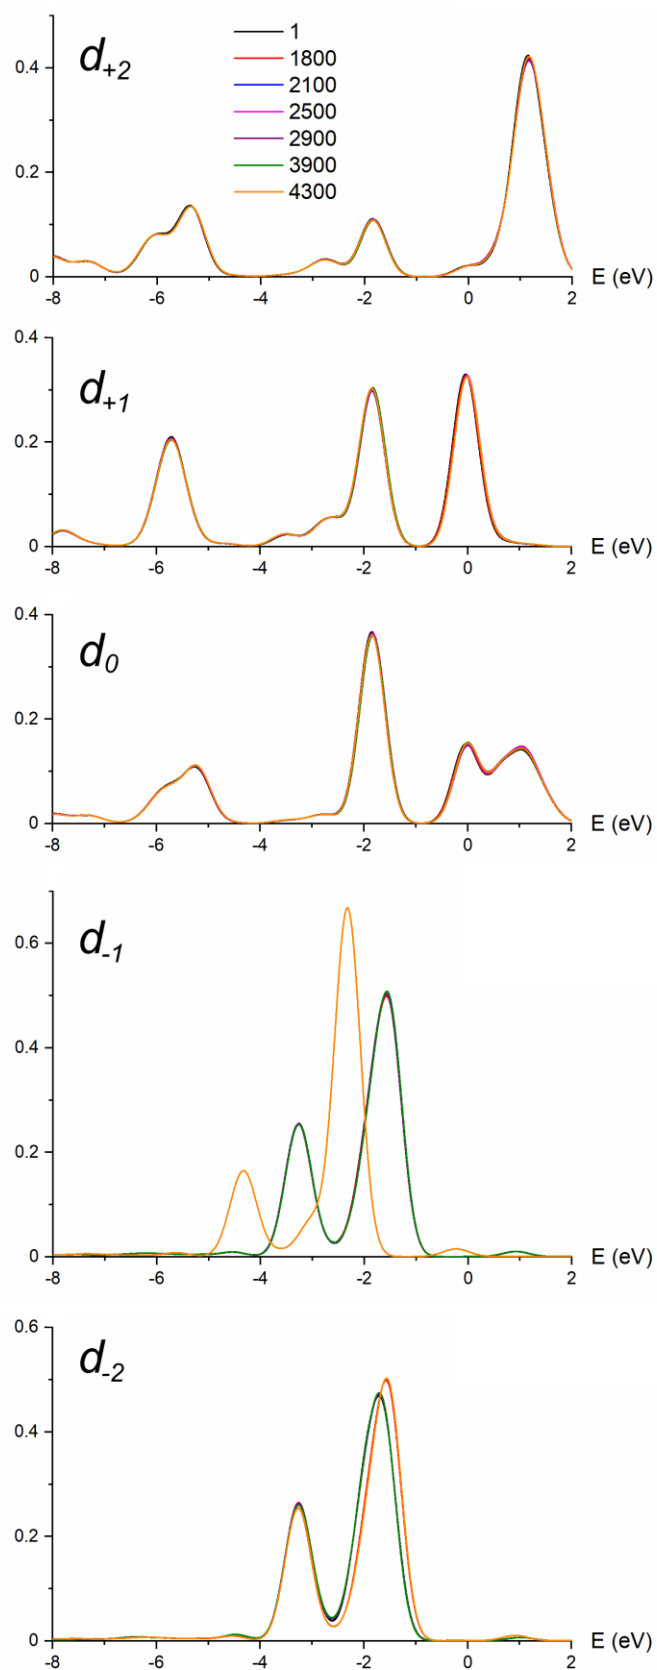

**Figure S74.** Reported LDOS of the alpha d-orbitals of the  $\text{Co}^{\text{II}}$  ions of  $1_{\text{cry,LS}}$  at the seven studied different pressures ( $p = 1, 1800, 2100, 2500, 2900, 3900, 4300$  bar).

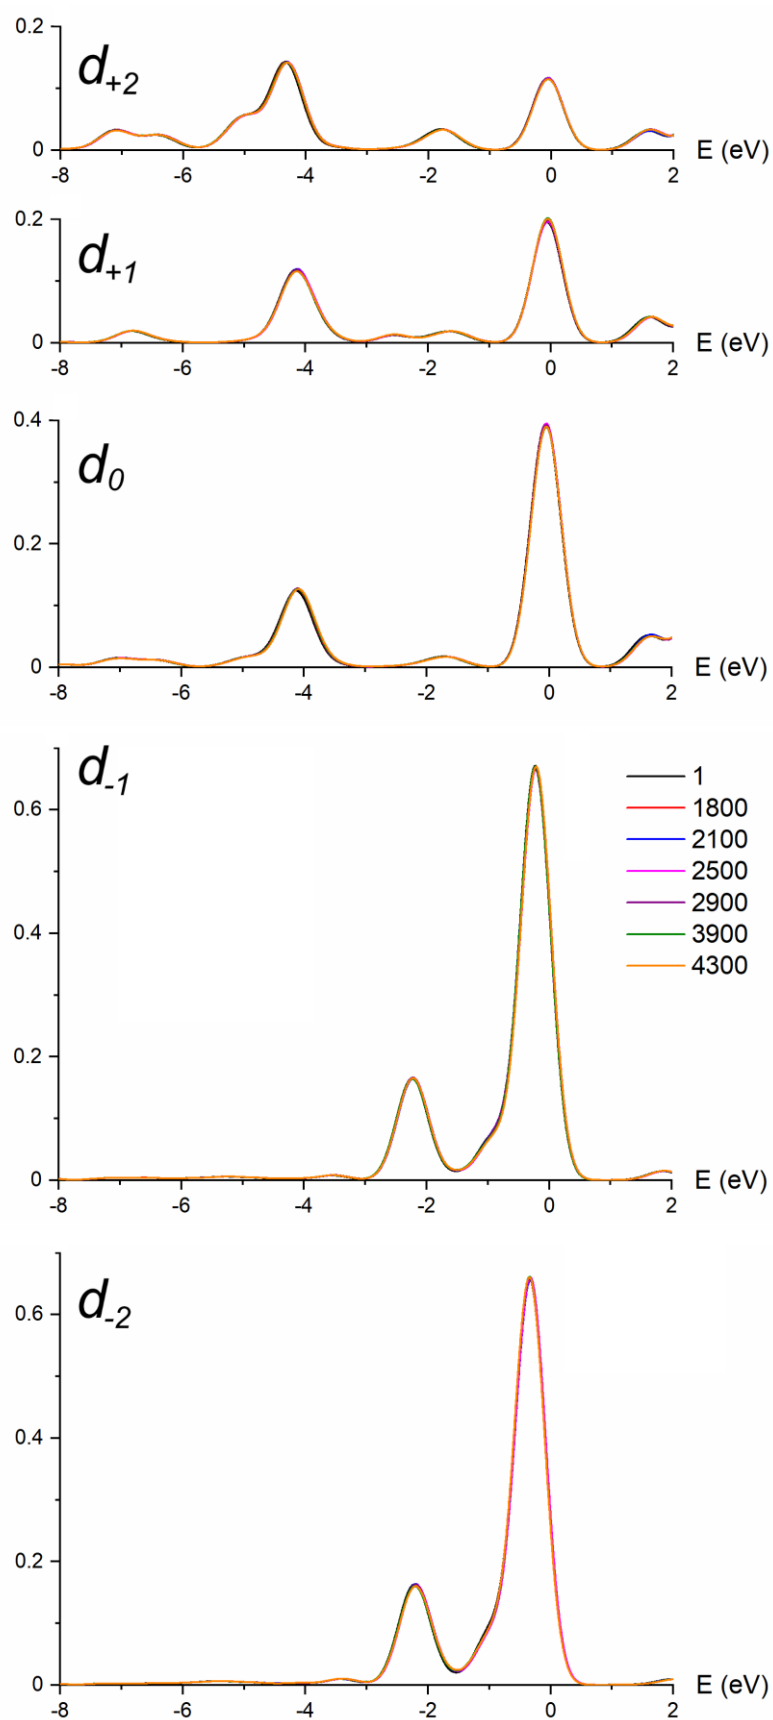

**Figure S75.** Reported LDOS of the beta d-orbitals of the  $\text{Co}^{\text{II}}$  ions of  $1_{\text{cry,LS}}$  at the seven studied different pressures ( $p = 1, 1800, 2100, 2500, 2900, 3900, 4300$  bar).

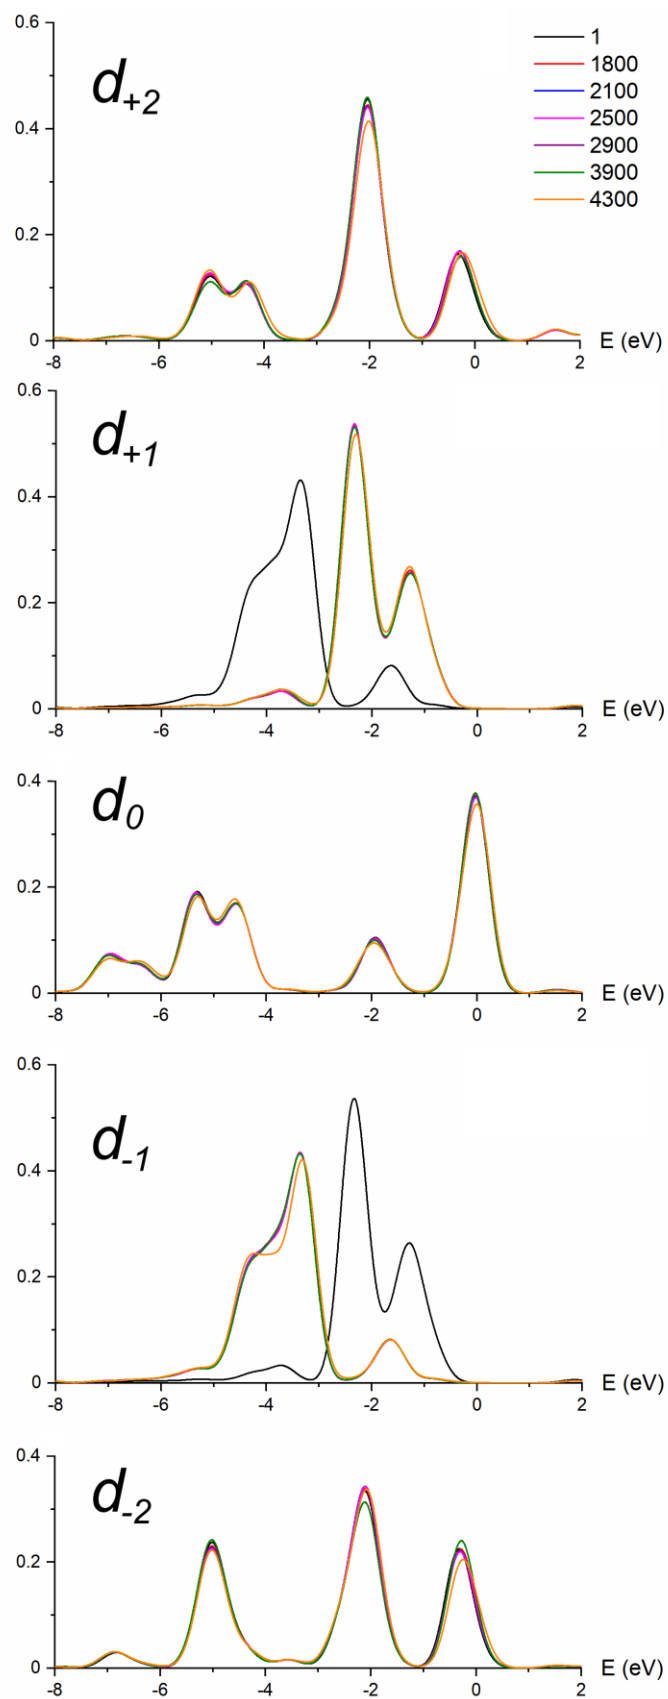

**Figure S76.** Reported LDOS of the alpha d-orbitals of the  $\text{Co}^{\text{II}}$  ions of  $1_{\text{cry,HS}}$  at the seven studied different pressures ( $p = 1, 1800, 2100, 2500, 2900, 3900, 4300$  bar).

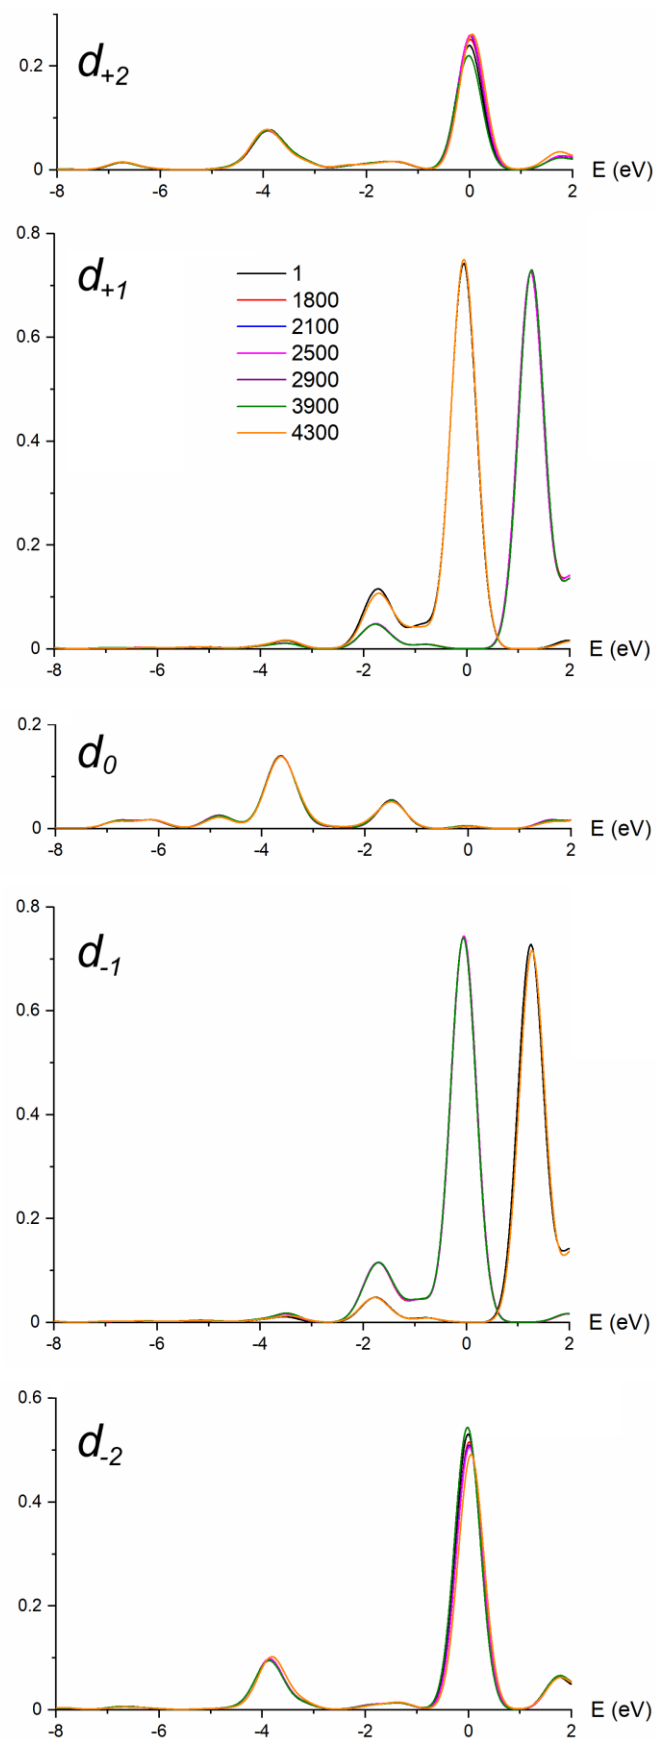

**Figure S77.** Reported LDOS of the beta d-orbitals of the  $\text{Co}^{II}$  ions of  $1_{\text{cry,HS}}$  at the seven studied different pressures ( $p = 1, 1800, 2100, 2500, 2900, 3900, 4300$  bar).

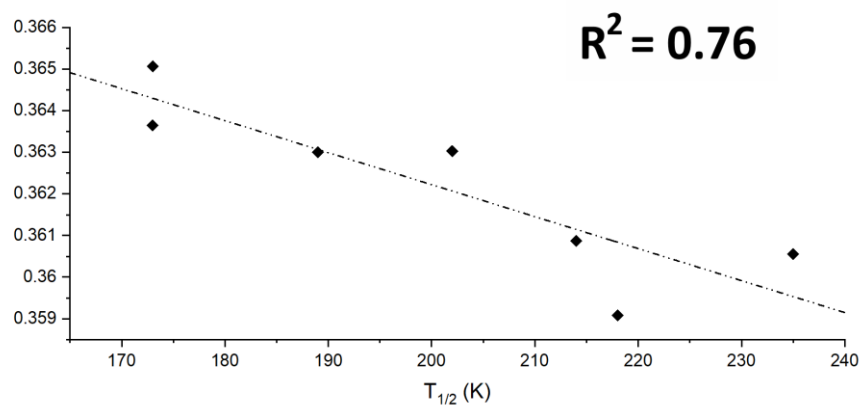

**Figure S78.** Reported Intensity of the band of  $1_{cry,LS}$  at -1.85 eV of Co( $d_0$ ) atomic orbitals vs the measured  $T_{1/2}$ . Trend line reports the [I vs.  $T_{1/2}$ ] correlation factor ( $R^2 = 0.76$ ).

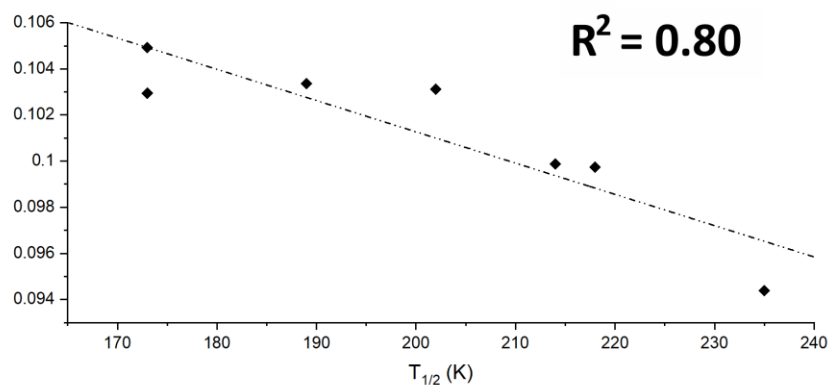

**Figure S79.** Reported Intensity of the band of  $1_{cry,HS}$  at -1.93 eV of Co( $d_0$ ) atomic orbitals vs the measured  $T_{1/2}$ . Trend line reports the [I vs.  $T_{1/2}$ ] correlation factor ( $R^2 = 0.80$ ).

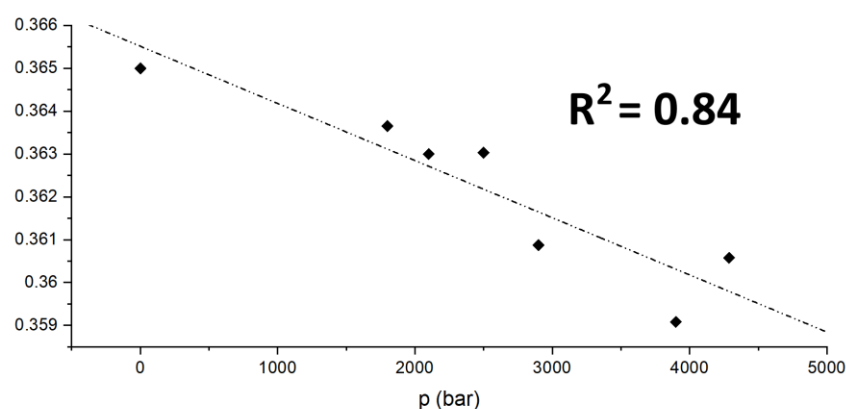

**Figure S80.** Reported Intensity of the band of  $1_{cry,LS}$  at -1.85 eV of Co( $d_0$ ) atomic orbitals vs the experimental pressures where the SCO phenomenon was monitored. Trend line reports the [I vs.  $p$ ] correlation factor ( $R^2 = 0.84$ ).

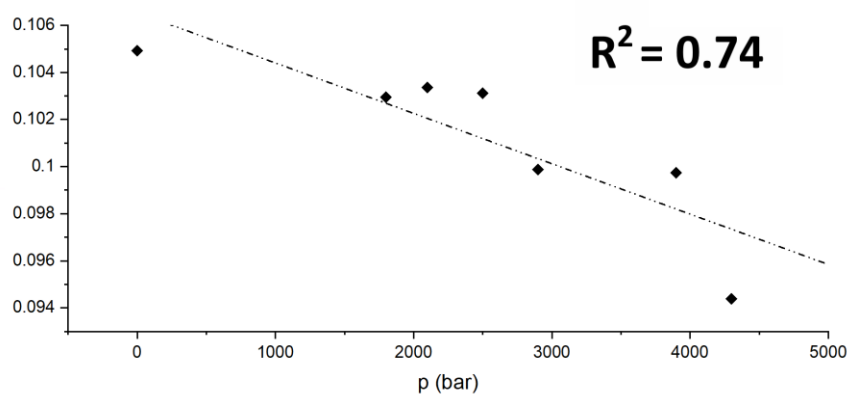

**Figure S81.** Reported Intensity of the band of  $1_{\text{cry,HS}}$  at  $-1.93$  eV of  $\text{Co}(d_0)$  atomic orbitals vs the experimental pressures where the SCO phenomenon was monitored. Trend line reports the  $[I \text{ vs. } p]$  correlation factor ( $R^2 = 0.74$ ).

## 3.2. LDOS: Nitrogen Atoms

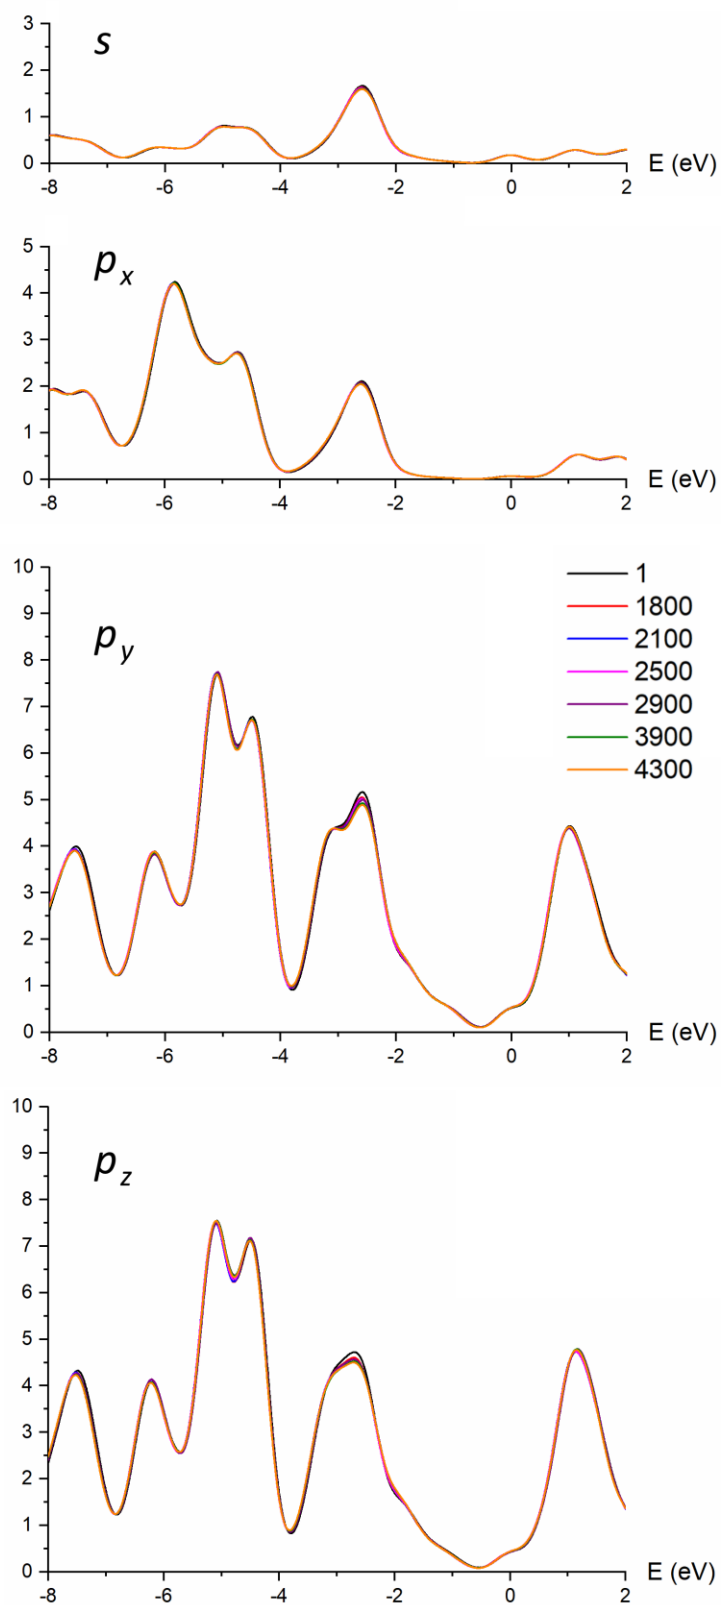

**Figure S82.** Reported LDOS of the orbitals of the N atoms of  $1_{\text{cry,LS}}$  at the seven studied different pressures ( $p = 1, 1800, 2100, 2500, 2900, 3900, 4300$  bar).

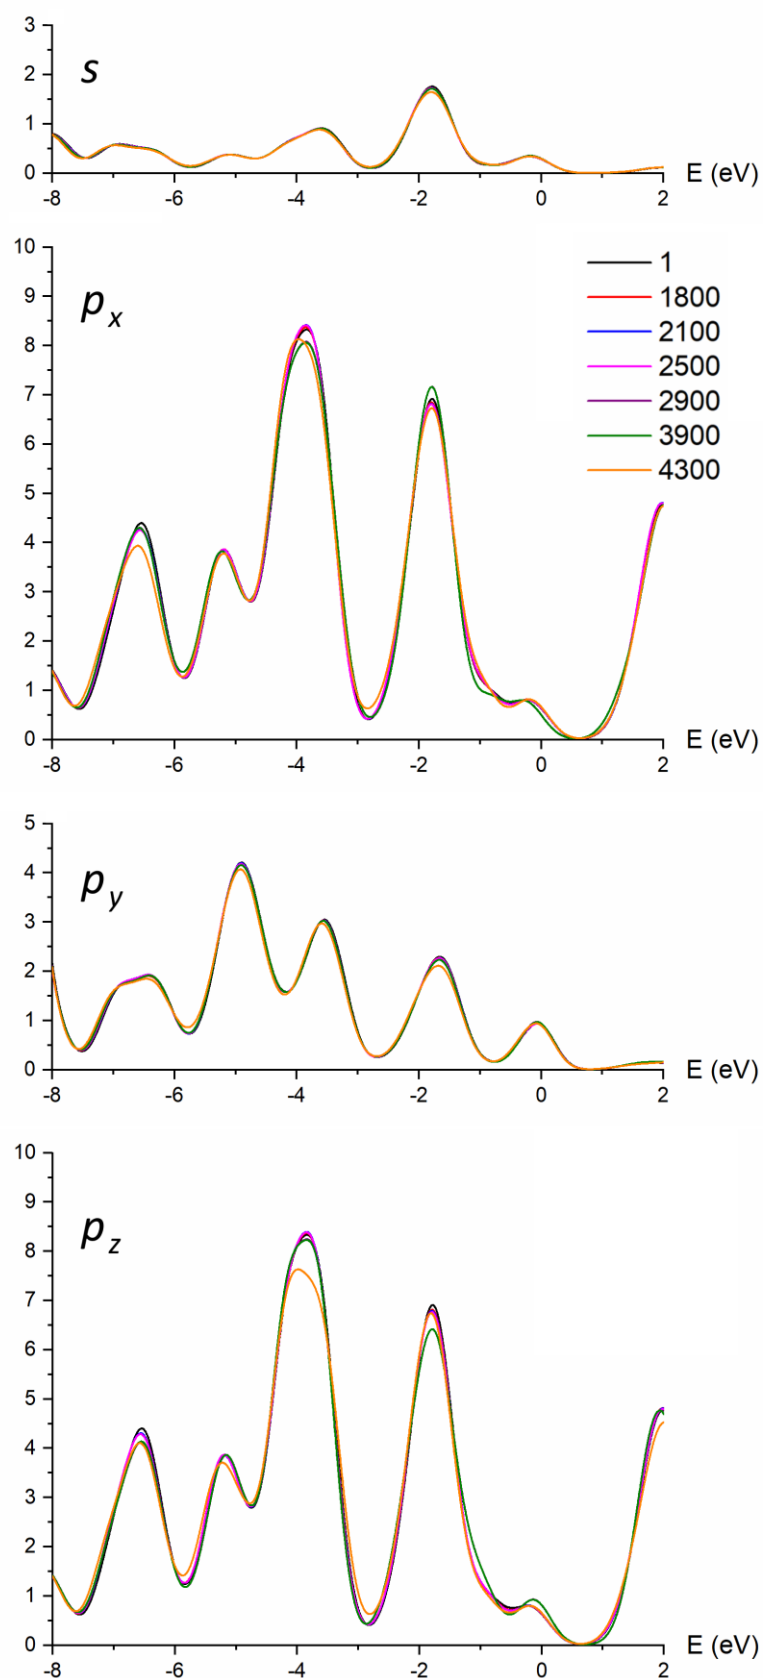

**Figure S83.** Reported LDOS of the orbitals of the N atoms of  $1_{\text{cry,HS}}$  at the seven studied different pressures ( $p = 1, 1800, 2100, 2500, 2900, 3900, 4300$  bar).

### 3.3. LDOS: Carbon Atoms

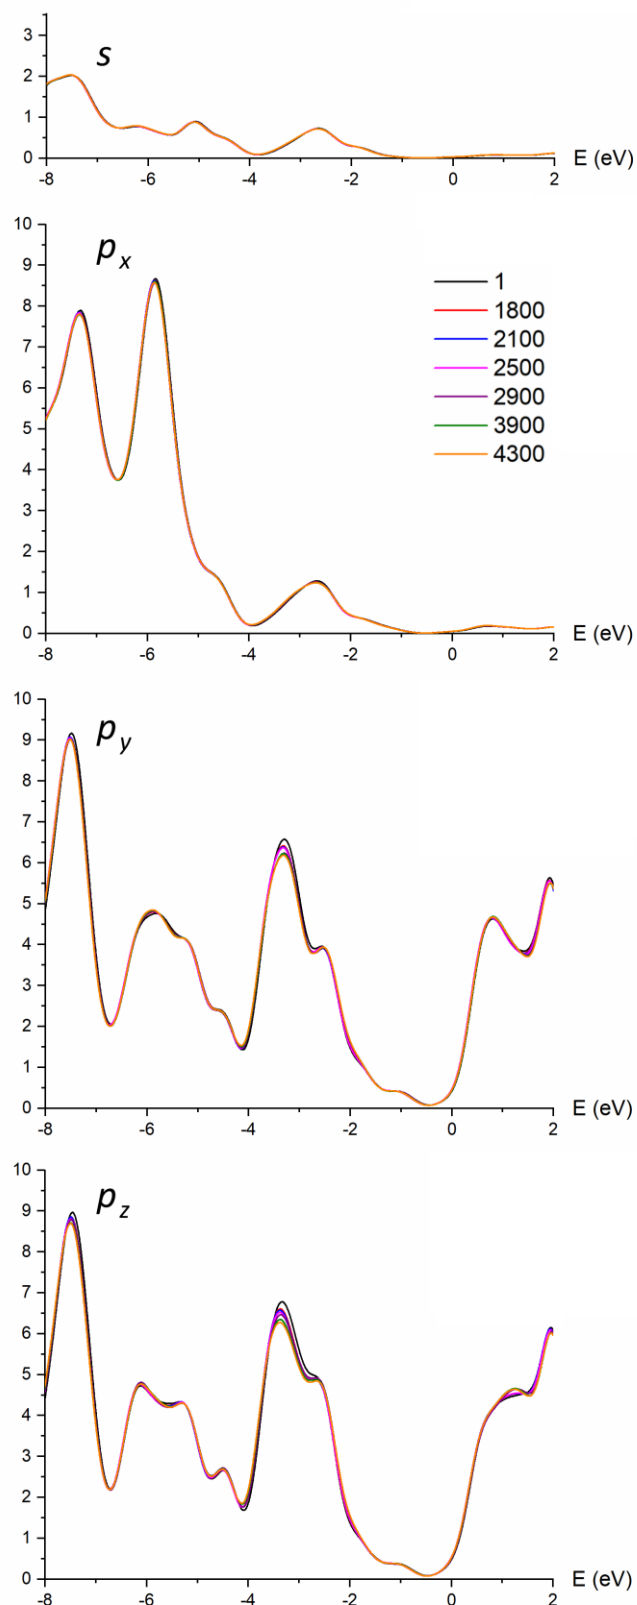

**Figure S84.** Reported LDOS of the orbitals of the C atoms of  $1_{\text{cry,LS}}$  at the seven studied different pressures ( $p = 1, 1800, 2100, 2500, 2900, 3900, 4300$  bar).

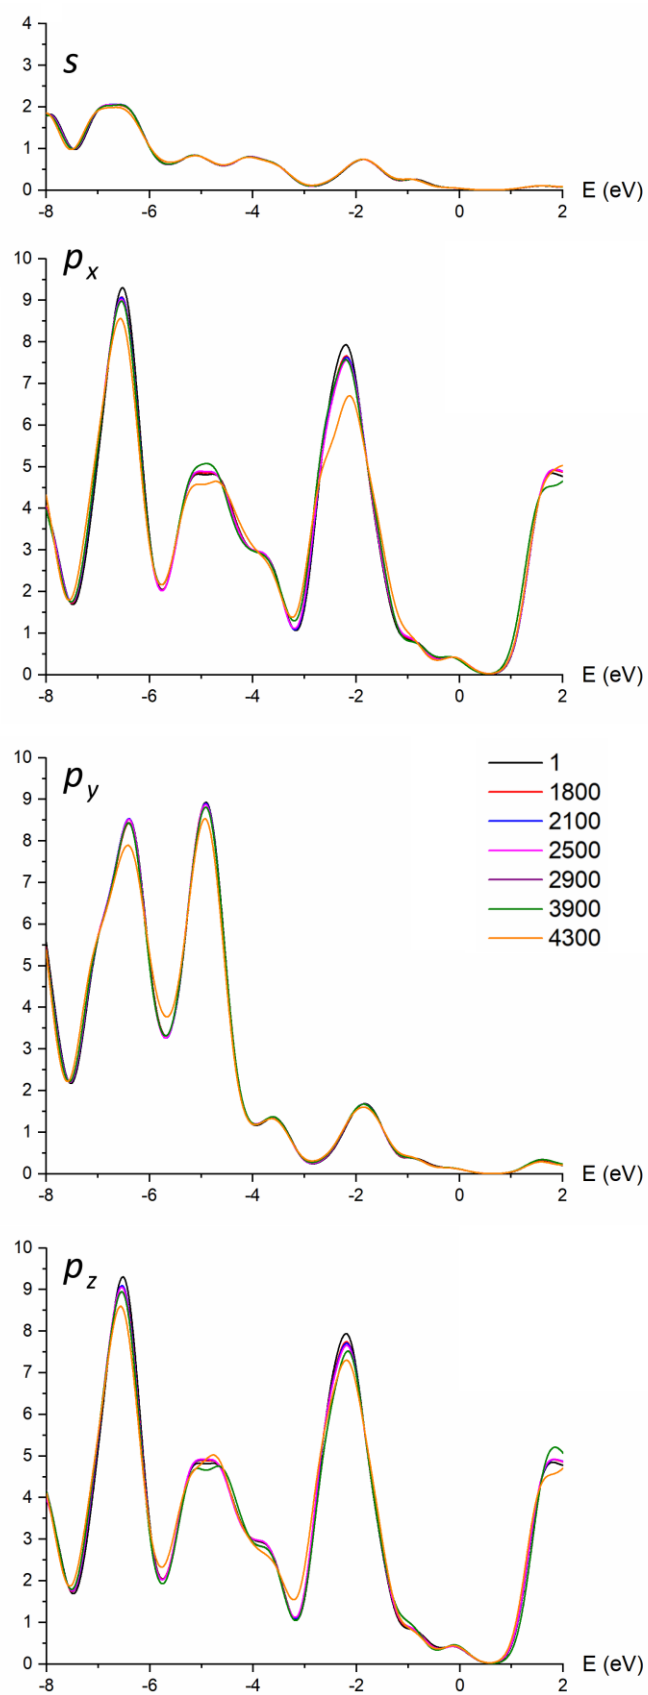

**Figure S85.** Reported LDOS of the orbitals of the C atoms of  $1_{\text{cry,HS}}$  at the seven studied different pressures ( $p = 1, 1800, 2100, 2500, 2900, 3900, 4300$  bar).

## 3.2. Molecular Orbitals of [Co(dpzca)<sub>2</sub>]

**Table S12.** Reported metal-centred MOs contributing to the main peak at 1.9eV in  $1_{\text{cry,LS}}$  and  $1_{\text{cry,HS}}$  TDOS (Figure 7). Last three columns on the right reports the correlation factor of the MOs energies against all seven employed different pressures; six different pressures (excluding results for  $p = 3900$  bar); and the seven different measured  $T_{1/2}$ .

| $p$ / bar                  |              | 1        | 1800     | 2100     | 2500     | 2900     | 3900     | 4300     | $R^2$ (p)<br>(all pressures) | $R^2$ (p)<br>( $p = 3900$ bar<br>excluded) | $R^2$ ( $T_{1/2}$ ) |
|----------------------------|--------------|----------|----------|----------|----------|----------|----------|----------|------------------------------|--------------------------------------------|---------------------|
| $T_{1/2}(\text{exp.})$ / K |              | 173      | 173      | 189      | 202      | 214      | 227      | 235      |                              |                                            |                     |
| $1_{\text{cry,LS}}$        | 277 $\beta$  | -2.08711 | -1.9946  | -1.98643 | -1.97011 | -1.94562 | -1.91296 | -1.90208 | 0.99 (Fig. S88)              | 0.99 (Fig. S88)                            | 0.79 (Fig. S106)    |
|                            | 278 $\beta$  | -2.09528 | -2.02181 | -2.01364 | -2.00004 | -1.95378 | -1.92929 | -1.9184  | 0.98 (Fig. S89)              | 0.97 (Fig. S89)                            | 0.85 (Fig. S107)    |
|                            | 279 $\beta$  | -2.09528 | -2.02997 | -2.01909 | -2.0082  | -1.95922 | -1.94017 | -1.92929 | 0.97 (Fig. S90)              | 0.96 (Fig. S90)                            | 0.86 (Fig. S108)    |
|                            | 280 $\beta$  | -2.10072 | -2.03813 | -2.02725 | -2.01909 | -1.98915 | -1.94017 | -1.92929 | 0.98 (Fig. S91)              | 0.98 (Fig. S91)                            | 0.85 (Fig. S109)    |
| $1_{\text{cry,HS}}$        | 270 $\alpha$ | -2.65311 | -2.57964 | -2.56604 | -2.54971 | -2.49801 | -2.49529 | -2.33746 | 0.82 (Fig. S92)              | 0.89 (Fig. S92)                            | 0.84 (Fig. S110)    |
|                            | 271 $\alpha$ | -2.64767 | -2.5742  | -2.56059 | -2.54699 | -2.49256 | -2.48984 | -2.31569 | 0.79 (Fig. S93)              | 0.88 (Fig. S93)                            | 0.83 (Fig. S111)    |
|                            | 272 $\alpha$ | -2.64495 | -2.5742  | -2.55787 | -2.54154 | -2.46807 | -2.46535 | -2.31569 | 0.84 (Fig. S94)              | 0.89 (Fig. S94)                            | 0.88 (Fig. S112)    |
|                            | 273 $\alpha$ | -2.6259  | -2.54699 | -2.53066 | -2.54154 | -2.46807 | -2.46535 | -2.25038 | 0.73 (Fig. S95)              | 0.83 (Fig. S95)                            | 0.77 (Fig. S113)    |
|                            | 274 $\alpha$ | -2.61502 | -2.54154 | -2.52522 | -2.51161 | -2.45991 | -2.45719 | -2.23678 | 0.74 (Fig. S96)              | 0.84 (Fig. S96)                            | 0.79 (Fig. S114)    |
|                            | 275 $\alpha$ | -2.61502 | -2.53882 | -2.52522 | -2.50889 | -2.45447 | -2.45175 | -2.22861 | 0.74 (Fig. S97)              | 0.84 (Fig. S97)                            | 0.79 (Fig. S115)    |
|                            | 276 $\alpha$ | -2.61229 | -2.53882 | -2.5225  | -2.50889 | -2.42726 | -2.42454 | -2.22861 | 0.79 (Fig. S98)              | 0.85 (Fig. S98)                            | 0.85 (Fig. S116)    |
|                            | 273 $\beta$  | -2.24222 | -2.16603 | -2.1497  | -2.13337 | -2.098   | -2.09256 | -1.89391 | 0.75 (Fig. S99)              | 0.86 (Fig. S99)                            | 0.79 (Fig. S117)    |
|                            | 274 $\beta$  | -2.2395  | -2.16331 | -2.14698 | -2.13337 | -2.08439 | -2.07895 | -1.88847 | 0.78 (Fig. S100)             | 0.87 (Fig. S100)                           | 0.81 (Fig. S118)    |
|                            | 275 $\beta$  | -2.23406 | -2.16059 | -2.14426 | -2.12793 | -2.08167 | -2.07895 | -1.86942 | 0.75 (Fig. S101)             | 0.85 (Fig. S101)                           | 0.80 (Fig. S119)    |
|                            | 276 $\beta$  | -2.21773 | -2.14426 | -2.12521 | -2.1116  | -2.08167 | -2.07895 | -1.8667  | 0.72 (Fig. S102)             | 0.85 (Fig. S102)                           | 0.76 (Fig. S120)    |
|                            | 277 $\beta$  | -2.098   | -2.01636 | -1.99732 | -1.98643 | -1.92385 | -1.92112 | -1.73337 | 0.80 (Fig. S103)             | 0.88 (Fig. S103)                           | 0.83 (Fig. S121)    |
|                            | 279 $\beta$  | -2.08167 | -2.00004 | -1.98371 | -1.96738 | -1.91296 | -1.90752 | -1.72248 | 0.80 (Fig. S104)             | 0.88 (Fig. S104)                           | 0.83 (Fig. S122)    |
|                            | 280 $\beta$  | -2.07895 | -1.99732 | -1.98099 | -1.96738 | -1.91024 | -1.9048  | -1.70615 | 0.78 (Fig. S105)             | 0.87 (Fig. S105)                           | 0.82 (Fig. S123)    |

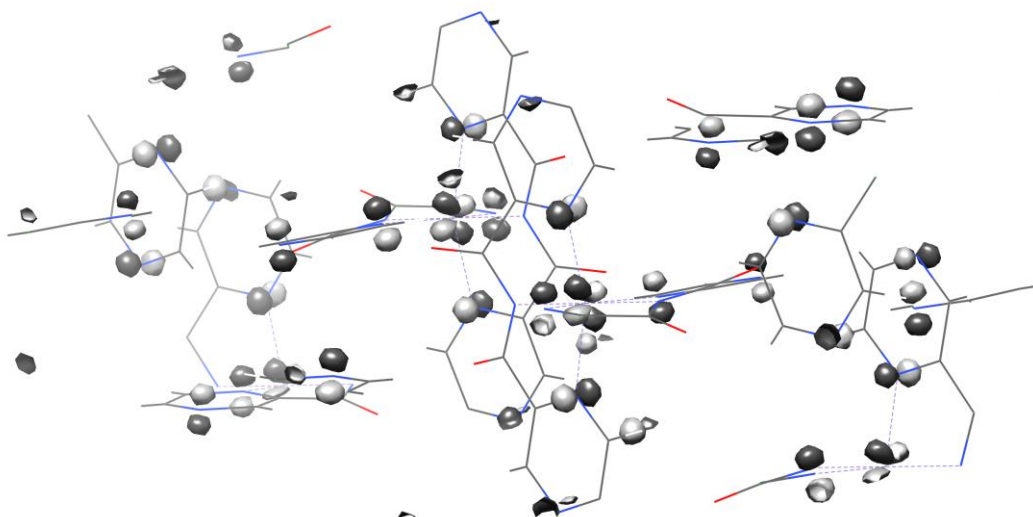

**Figure S86.** Plotted MOs 277 $\alpha$  ( $t_{2g}$  shaped) for  $1_{\text{cry,HS}}$  calculated at the pressure of 1bar ( $\rho$  cutoff = 0.04).

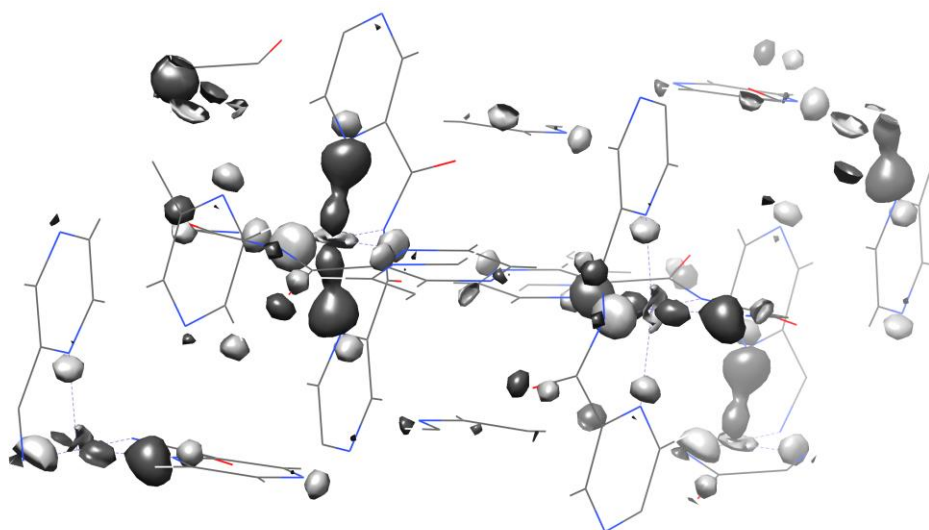

**Figure S87.** Plotted MOs 277 $\beta$  ( $e_g$  shaped) for  $1_{\text{cry,HS}}$  calculated at the pressure of 1bar ( $\rho$  cutoff = 0.04).

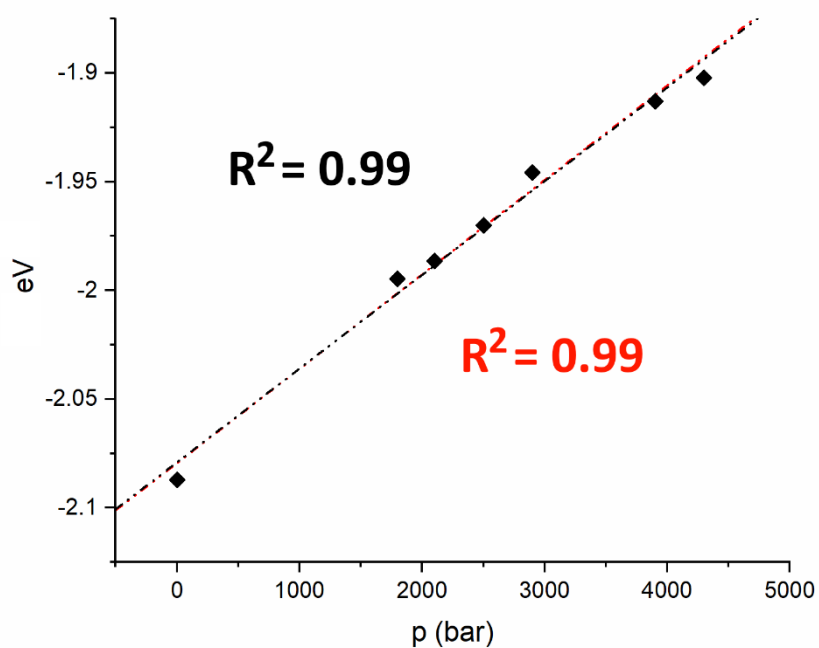

**Figure S88.** Reported trend for the variation of MO-277 $\beta$  in  $1_{\text{cry,LS}}$  at seven different pressures ( $R^2 = 0.99$ ) and six different pressures (except  $p = 3900$  bar,  $R^2 = 0.99$ ).

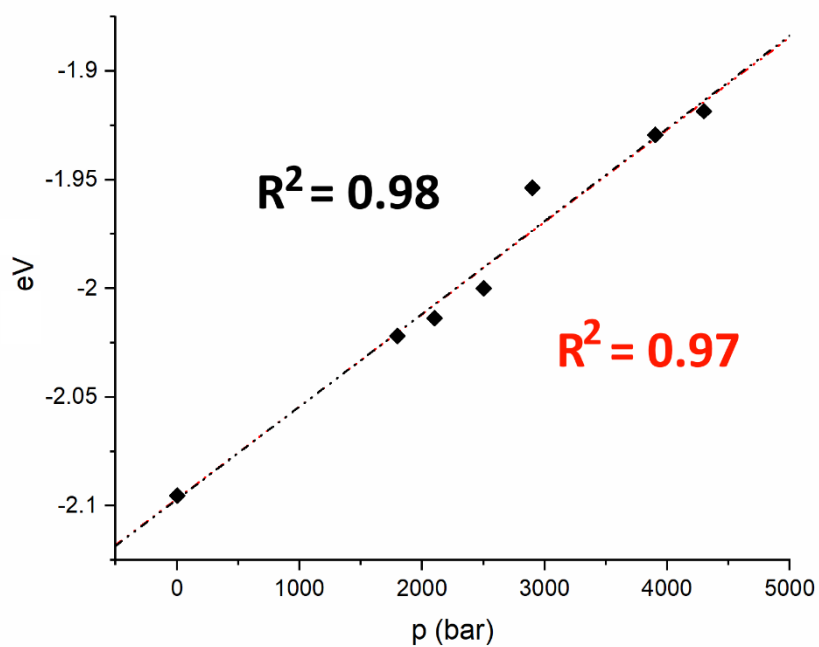

**Figure S89.** Reported trend for the variation of MO-278 $\beta$  in  $1_{\text{cry,LS}}$  at seven different pressures ( $R^2 = 0.98$ ) and six different pressures (except  $p = 3900$  bar,  $R^2 = 0.97$ ).

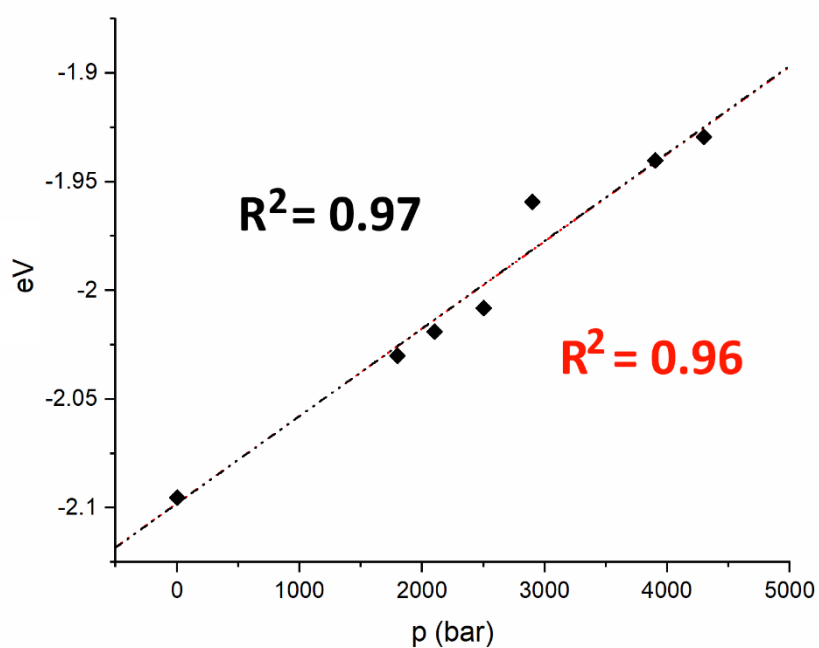

**Figure S90.** Reported trend for the variation of MO-279 $\beta$  in  $1_{\text{cry,LS}}$  at seven different pressures ( $R^2 = 0.97$ ) and six different pressures (except  $p = 3900$  bar,  $R^2 = 0.96$ ).

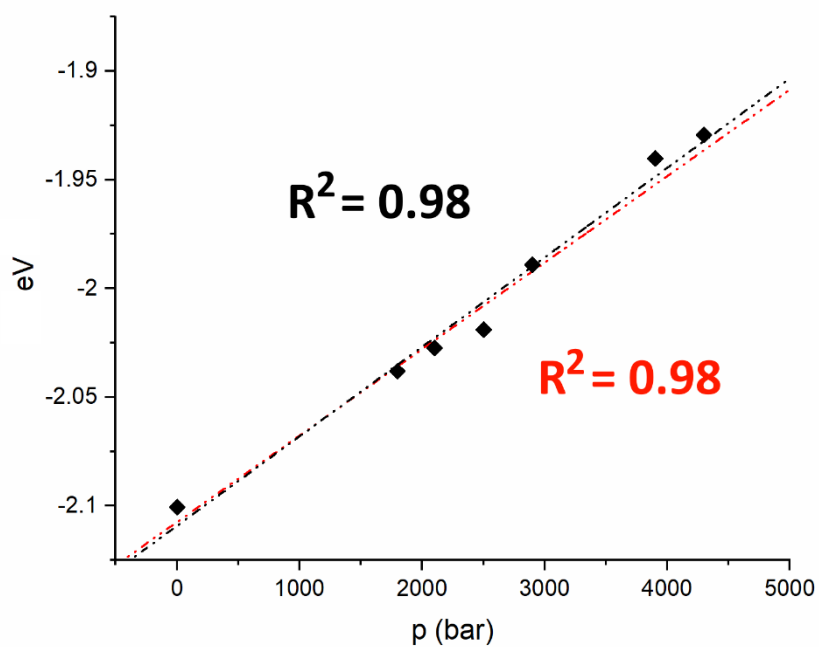

**Figure S91.** Reported trend for the variation of MO-280 $\beta$  in  $1_{\text{cry,LS}}$  at seven different pressures ( $R^2 = 0.98$ ) and six different pressures (except  $p = 3900$  bar,  $R^2 = 0.98$ ).

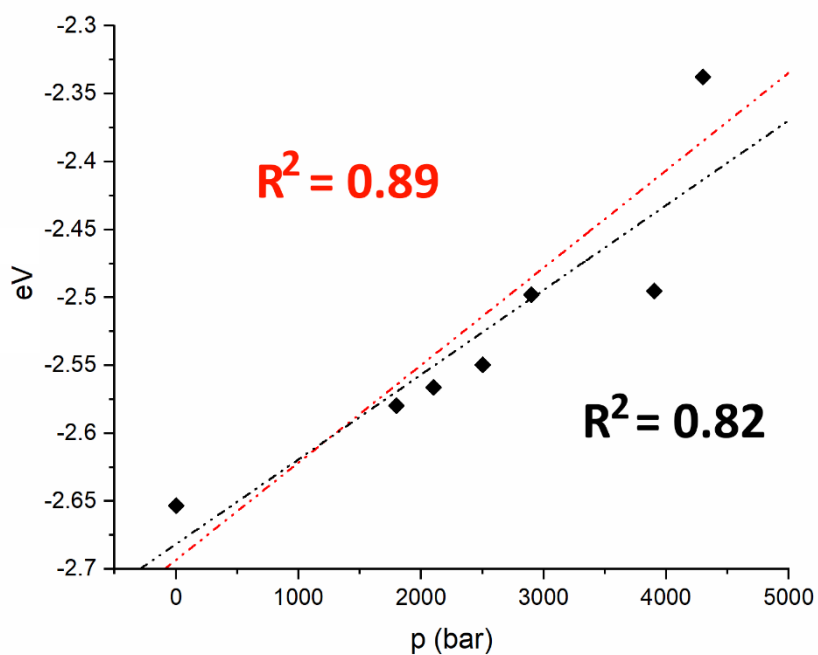

**Figure S92.** Reported trend for the variation of MO-270 $\alpha$  in  $1_{\text{cry,HS}}$  at seven different pressures ( $R^2 = 0.82$ ) and six different pressures (except  $p = 3900$  bar,  $R^2 = 0.89$ ).

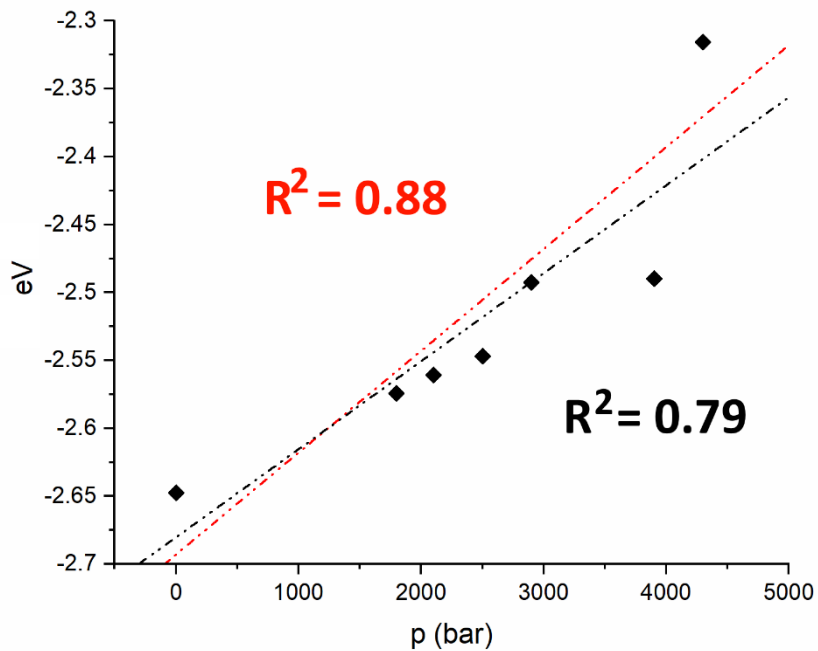

**Figure S93.** Reported trend for the variation of MO-271 $\alpha$  in  $1_{\text{cry,HS}}$  at seven different pressures ( $R^2 = 0.79$ ) and six different pressures (except  $p = 3900$  bar,  $R^2 = 0.88$ ).

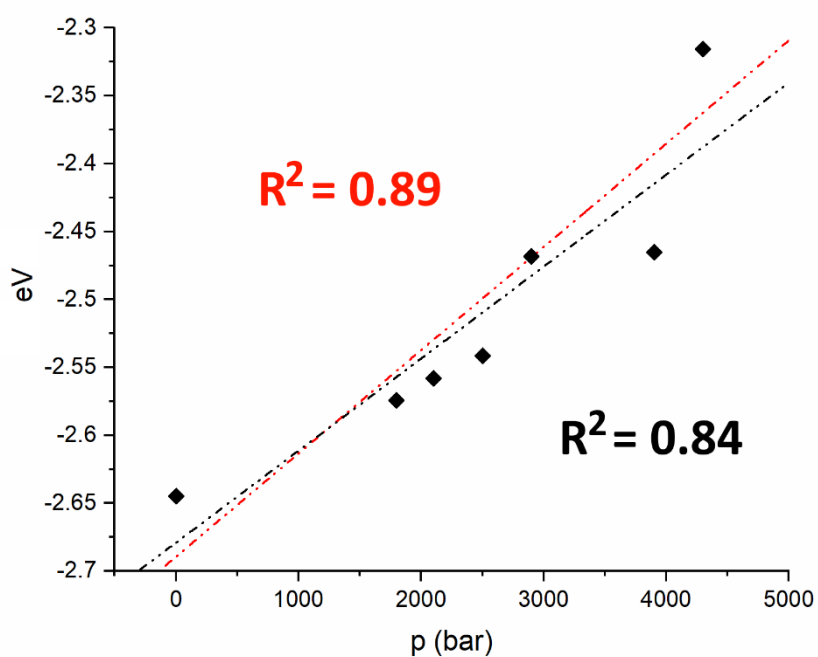

**Figure S94.** Reported trend for the variation of MO-272 $\alpha$  in  $1_{\text{cry,HS}}$  at seven different pressures ( $R^2 = 0.84$ ) and six different pressures (except  $p = 3900$  bar,  $R^2 = 0.89$ ).

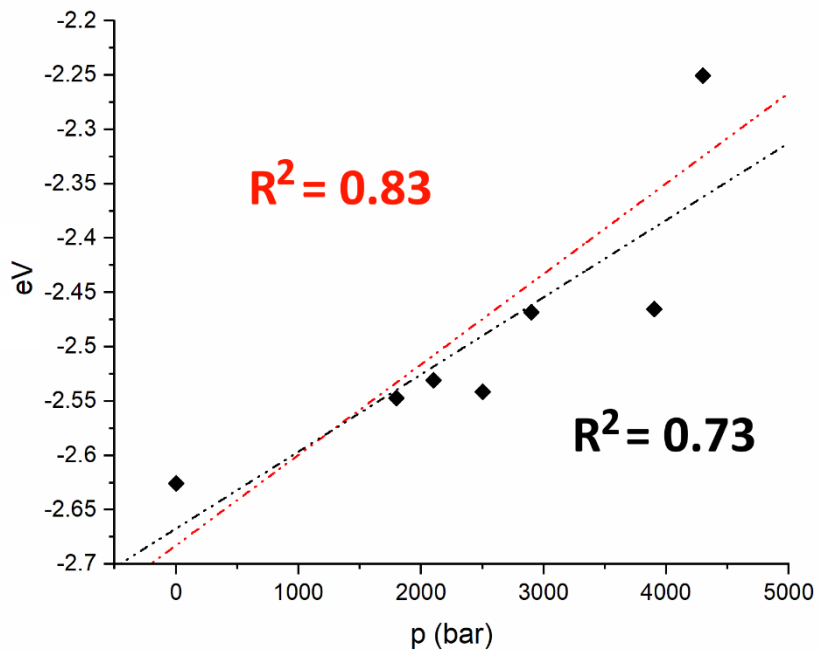

**Figure S95.** Reported trend for the variation of MO-273 $\alpha$  in  $1_{\text{cry,HS}}$  at seven different pressures ( $R^2 = 0.73$ ) and six different pressures (except  $p = 3900$  bar,  $R^2 = 0.83$ ).

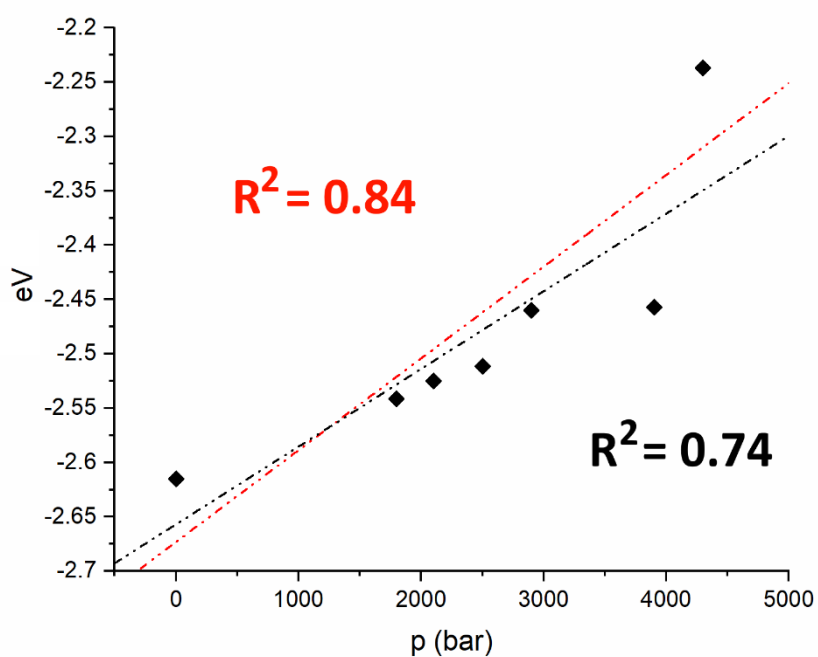

**Figure S96.** Reported trend for the variation of MO-274 $\alpha$  in  $1_{\text{cry,HS}}$  at seven different pressures ( $R^2 = 0.74$ ) and six different pressures (except  $p = 3900$  bar,  $R^2 = 0.84$ ).

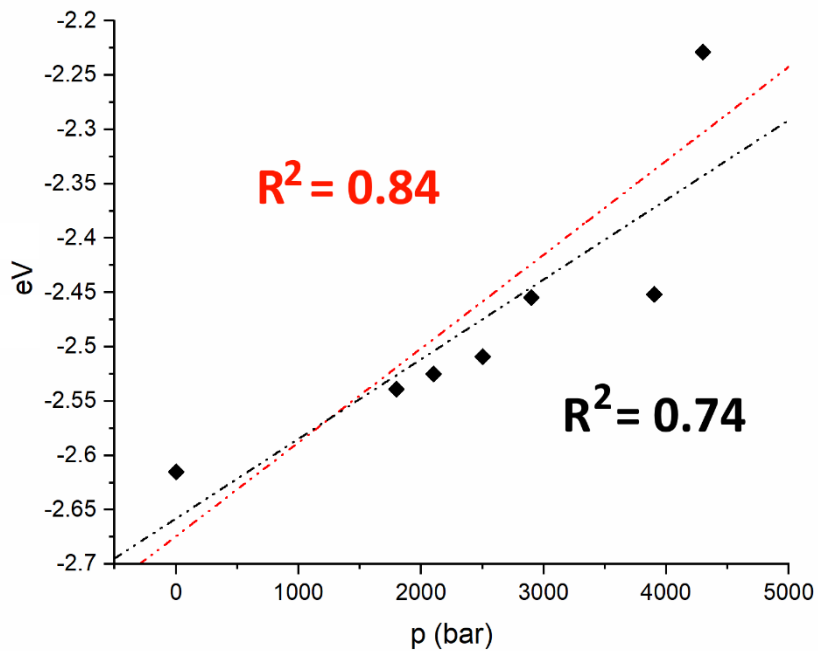

**Figure S97.** Reported trend for the variation of MO-275 $\alpha$  in  $1_{\text{cry,HS}}$  at seven different pressures ( $R^2 = 0.74$ ) and six different pressures (except  $p = 3900$  bar,  $R^2 = 0.84$ ).

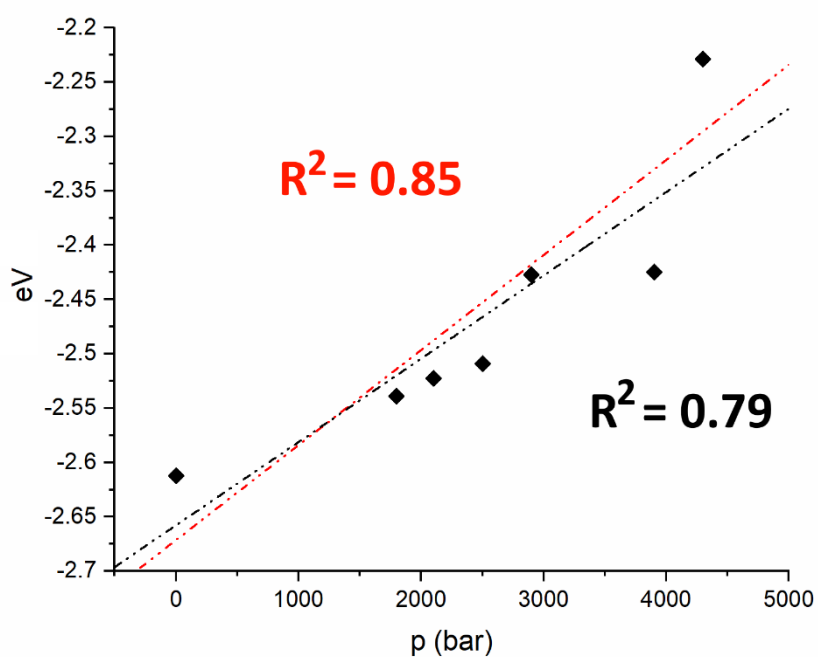

**Figure S98.** Reported trend for the variation of MO-276 $\alpha$  in  $1_{\text{cry,HS}}$  at seven different pressures ( $R^2 = 0.79$ ) and six different pressures (except  $p = 3900$  bar,  $R^2 = 0.85$ ).

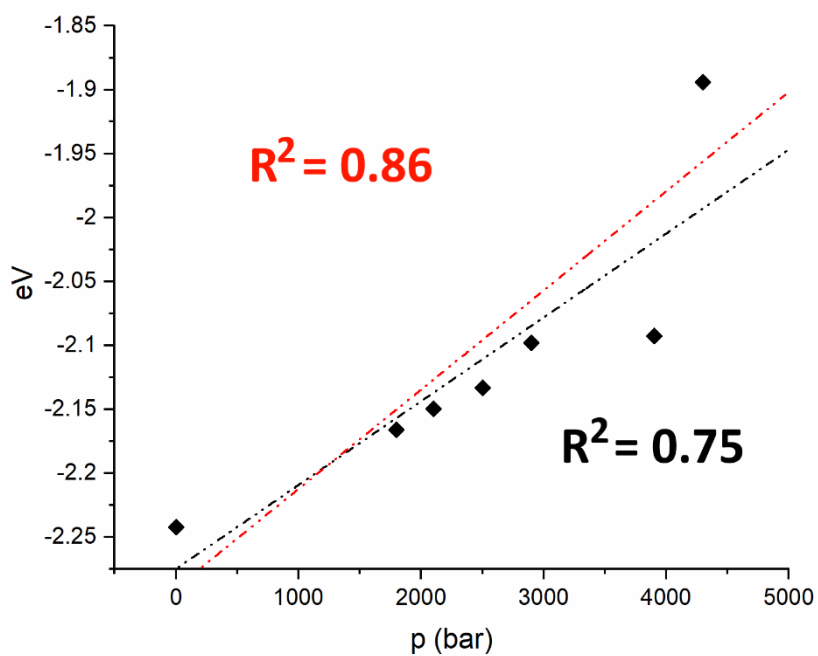

**Figure S99.** Reported trend for the variation of MO-273 $\beta$  in  $1_{\text{cry,HS}}$  at seven different pressures ( $R^2 = 0.75$ ) and six different pressures (except  $p = 3900$  bar,  $R^2 = 0.86$ ).

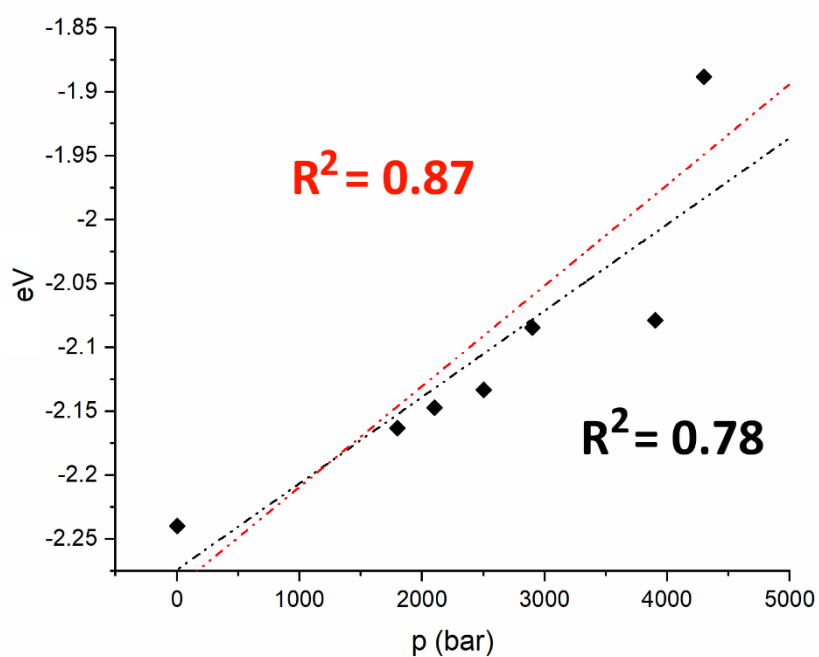

**Figure S100.** Reported trend for the variation of MO-274 $\beta$  in  $1_{\text{cry,HS}}$  at seven different pressures ( $R^2 = 0.78$ ) and six different pressures (except  $p = 3900$  bar,  $R^2 = 0.87$ ).

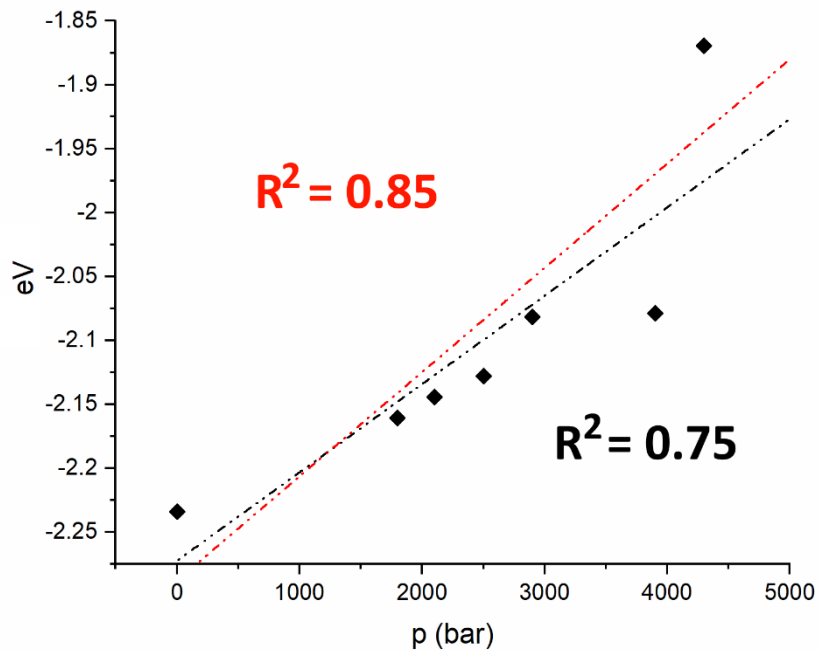

**Figure S101.** Reported trend for the variation of MO-275 $\beta$  in  $1_{\text{cry,HS}}$  at seven different pressures ( $R^2 = 0.75$ ) and six different pressures (except  $p = 3900$  bar,  $R^2 = 0.85$ ).

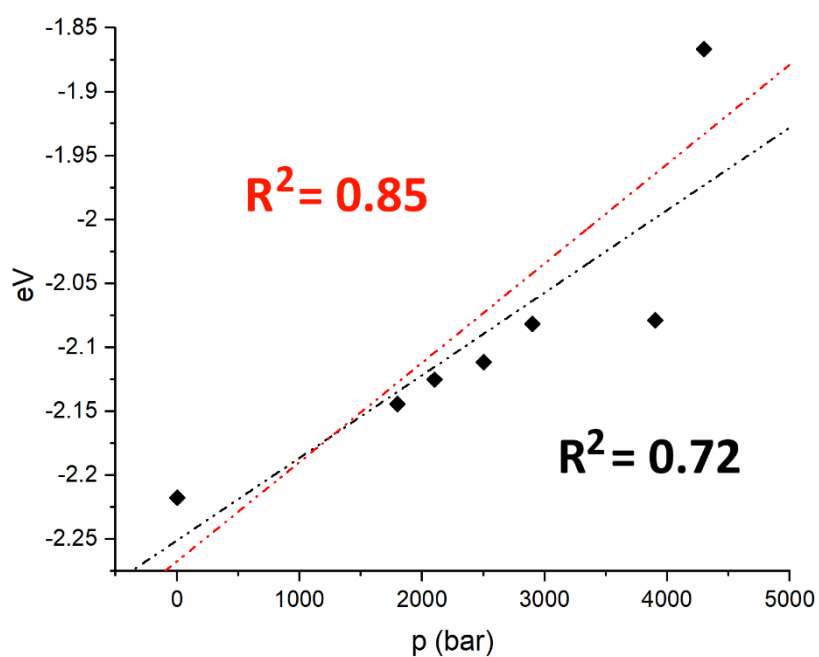

**Figure S102.** Reported trend for the variation of  $\text{MO-276}\beta$  in  $1_{\text{cry,HS}}$  at seven different pressures ( $R^2 = 0.72$ ) and six different pressures (except  $p = 3900$  bar,  $R^2 = 0.85$ ).

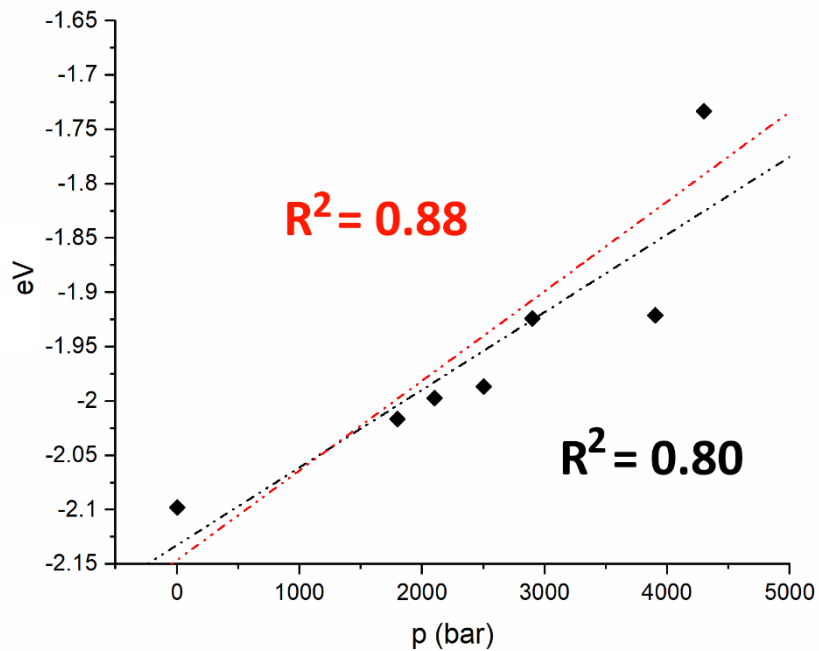

**Figure S103.** Reported trend for the variation of  $\text{MO-277}\beta$  in  $1_{\text{cry,HS}}$  at seven different pressures ( $R^2 = 0.80$ ) and six different pressures (except  $p = 3900$  bar,  $R^2 = 0.88$ ).

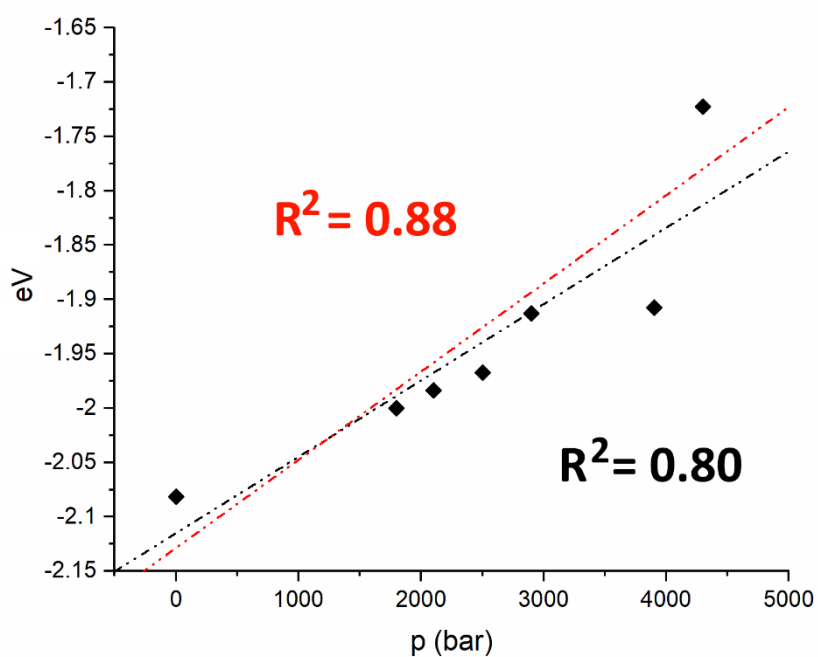

**Figure S104.** Reported trend for the variation of MO-279 $\beta$  in  $1_{\text{cry,HS}}$  at seven different pressures ( $R^2 = 0.80$ ) and six different pressures (except  $p = 3900$  bar,  $R^2 = 0.88$ ).

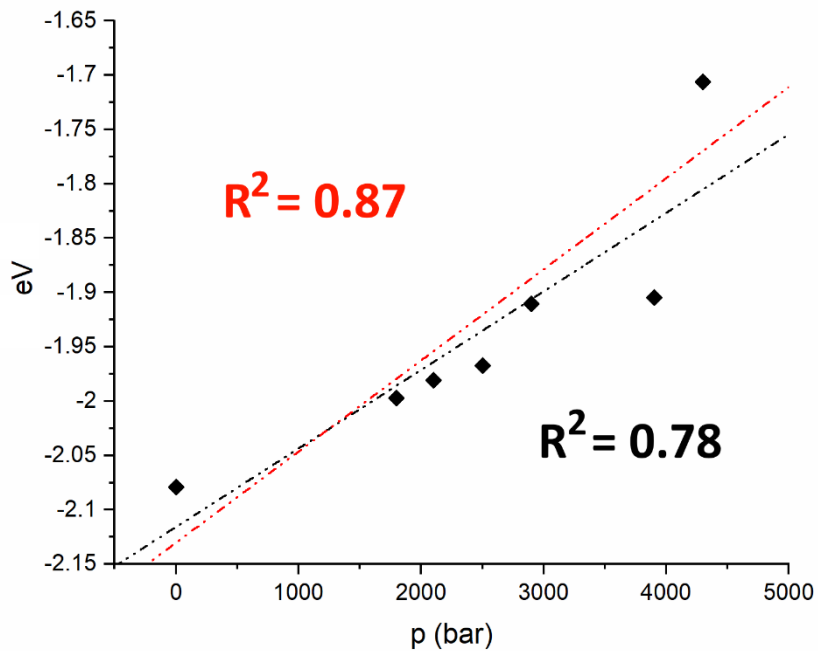

**Figure S105.** Reported trend for the variation of MO-280 $\beta$  in  $1_{\text{cry,HS}}$  at seven different pressures ( $R^2 = 0.78$ ) and six different pressures (except  $p = 3900$  bar,  $R^2 = 0.87$ ).

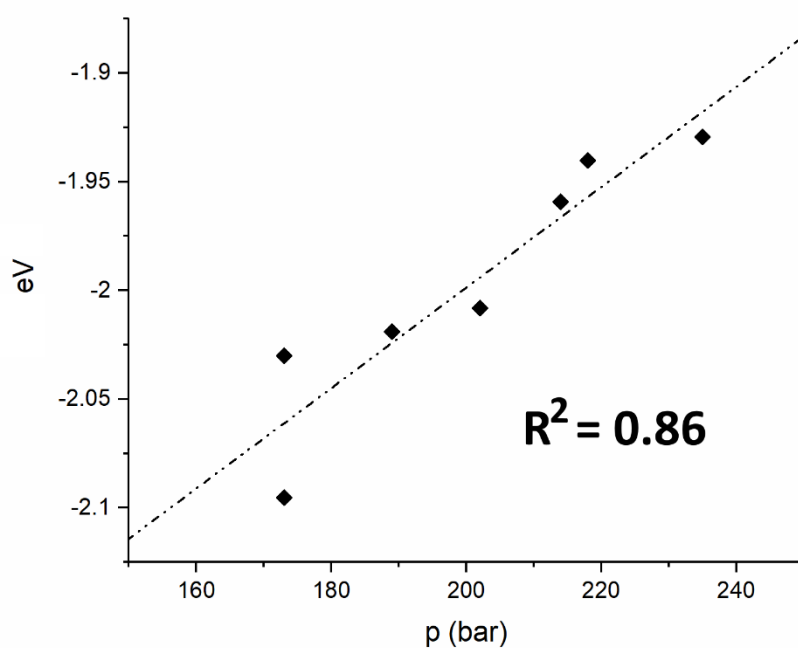

**Figure S106.** Reported trend for the variation of MO-279 $\beta$  in  $1_{\text{cry,LS}}$  versus the measured  $T_{1/2}$  at seven different pressures ( $R^2 = 0.86$ ).

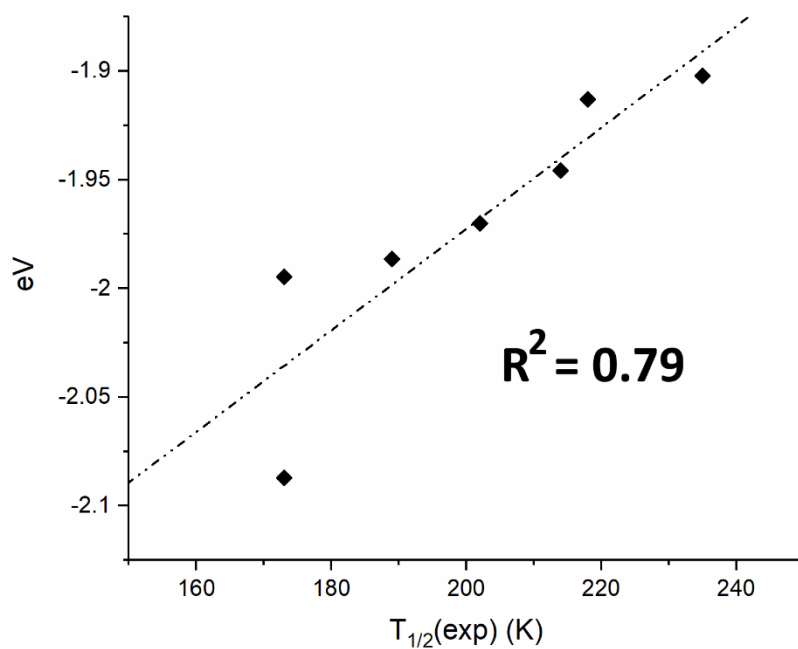

**Figure S107.** Reported trend for the variation of MO-277 $\beta$  in  $1_{\text{cry,LS}}$  versus the measured  $T_{1/2}$  at seven different pressures ( $R^2 = 0.79$ ).

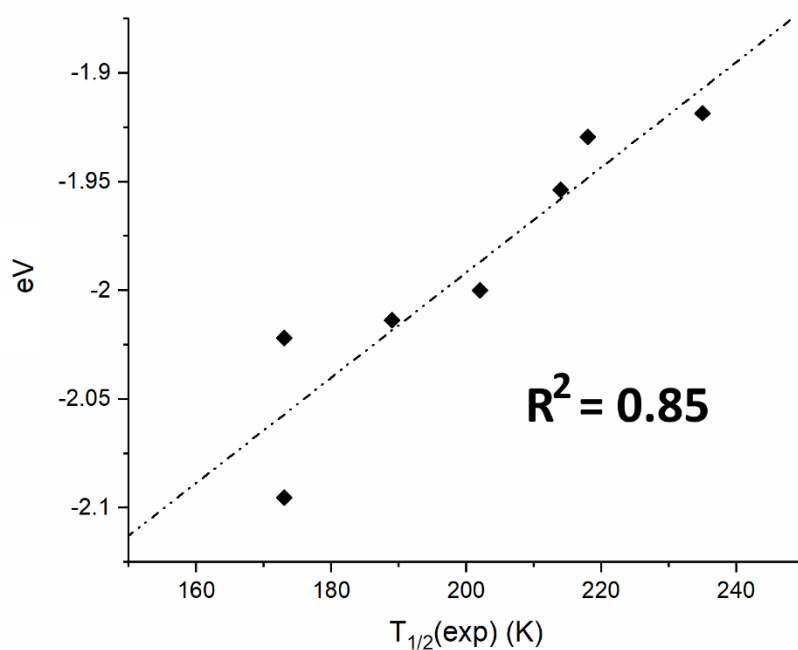

**Figure S108.** Reported trend for the variation of  $\text{MO-278}\beta$  in  $1_{\text{cry,LS}}$  versus the measured  $T_{1/2}$  at seven different pressures ( $R^2 = 0.85$ ).

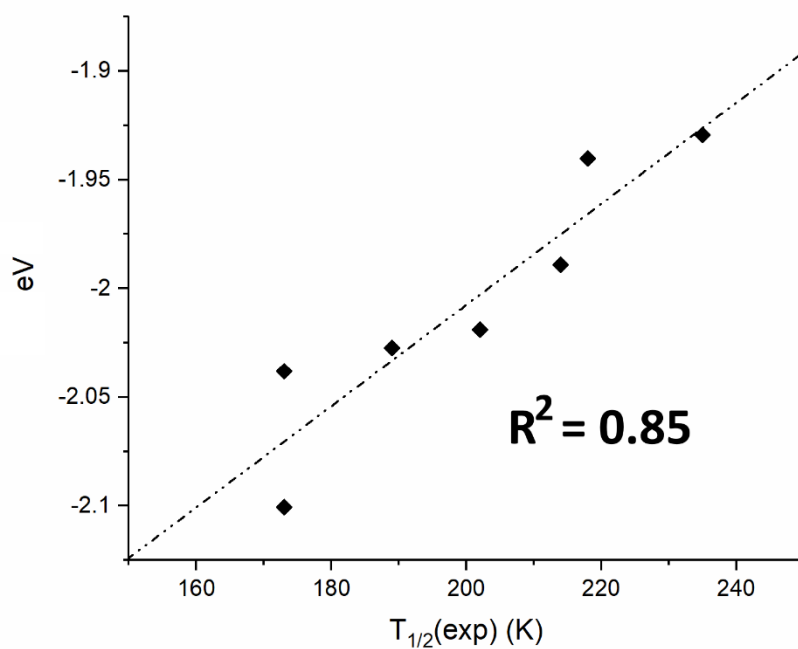

**Figure S109.** Reported trend for the variation of  $\text{MO-280}\beta$  in  $1_{\text{cry,LS}}$  versus the measured  $T_{1/2}$  at seven different pressures ( $R^2 = 0.85$ ).

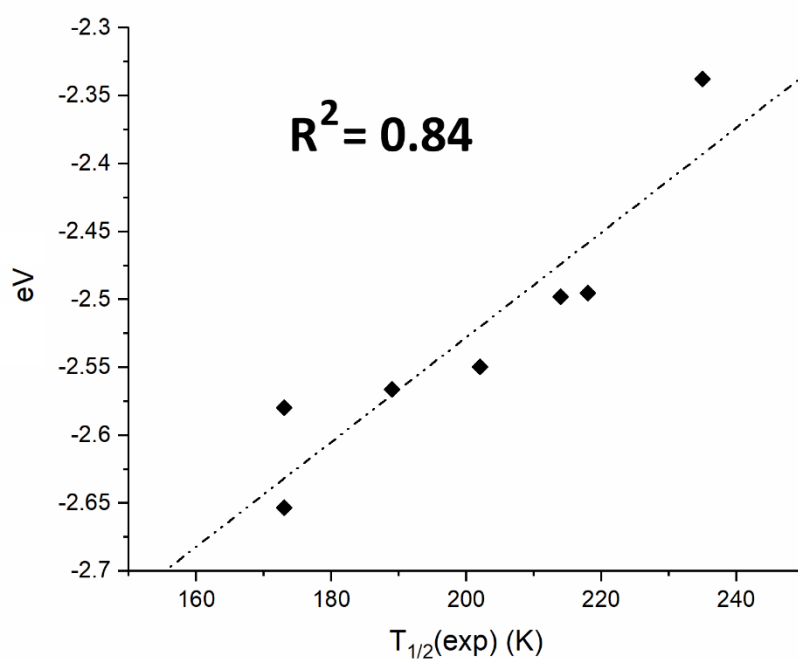

**Figure S110.** Reported trend for the variation of MO-270α in  $1_{\text{cry,HS}}$  versus the measured  $T_{1/2}$  at seven different pressures ( $R^2 = 0.84$ ).

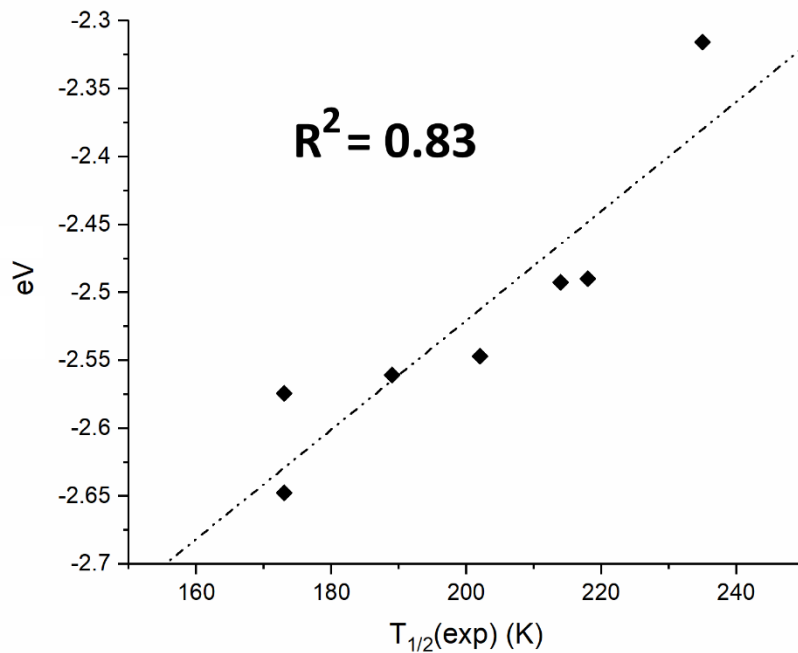

**Figure S111.** Reported trend for the variation of MO-271α in  $1_{\text{cry,HS}}$  versus the measured  $T_{1/2}$  at seven different pressures ( $R^2 = 0.83$ ).

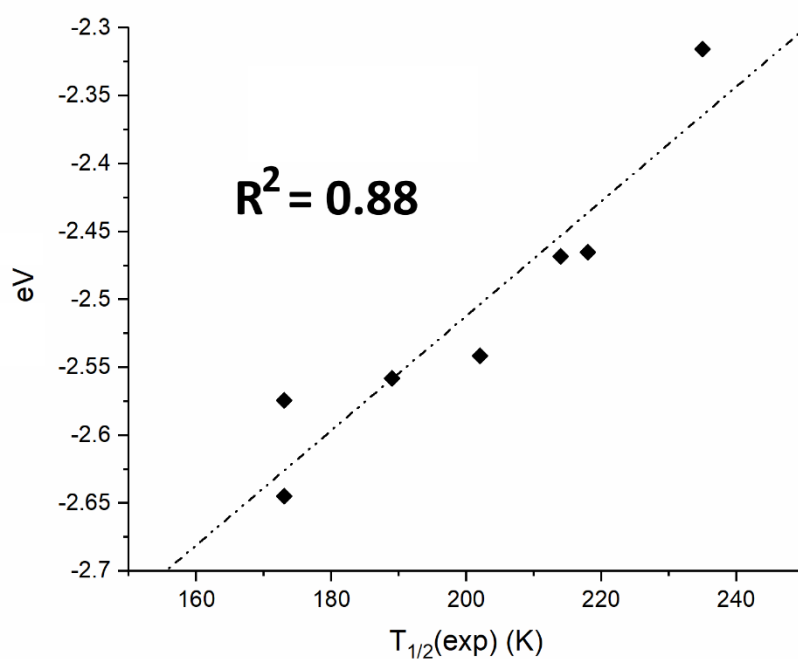

**Figure S112.** Reported trend for the variation of MO-272 $\alpha$  in  $1_{\text{cry,HS}}$  versus the measured  $T_{1/2}$  at seven different pressures ( $R^2 = 0.88$ ).

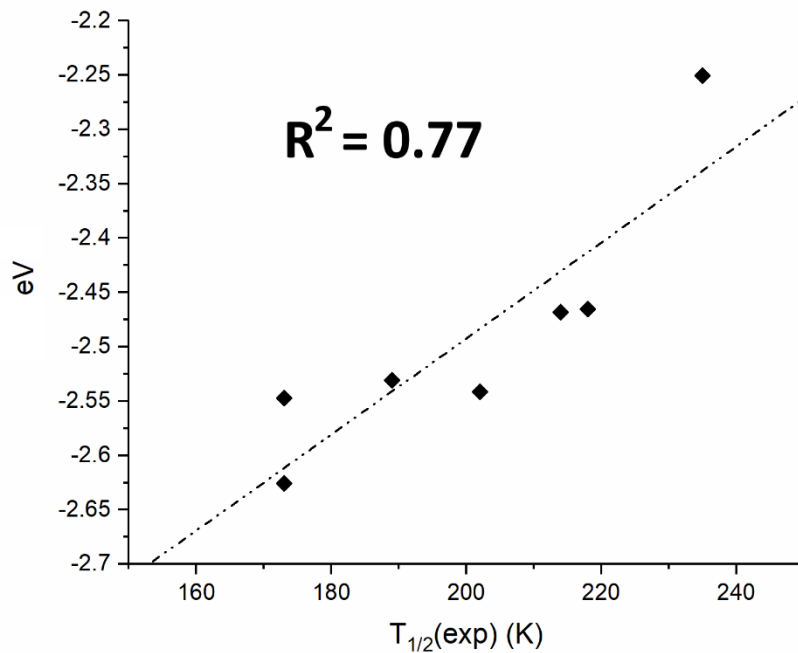

**Figure S113.** Reported trend for the variation of MO-273 $\alpha$  in  $1_{\text{cry,HS}}$  versus the measured  $T_{1/2}$  at seven different pressures ( $R^2 = 0.77$ ).

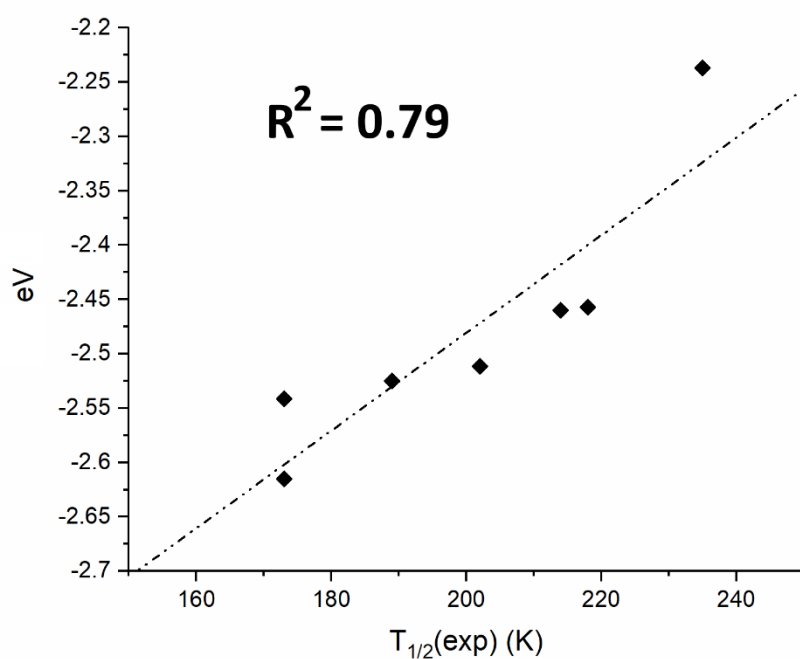

**Figure S114.** Reported trend for the variation of MO-274 $\alpha$  in  $1_{\text{cry,HS}}$  versus the measured  $T_{1/2}$  at seven different pressures ( $R^2 = 0.79$ ).

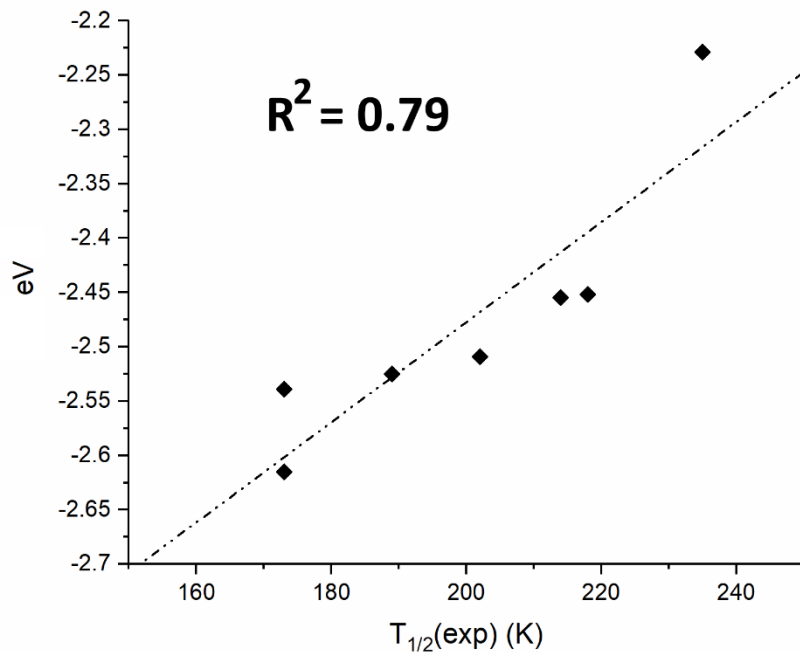

**Figure S115.** Reported trend for the variation of MO-275 $\alpha$  in  $1_{\text{cry,HS}}$  versus the measured  $T_{1/2}$  at seven different pressures ( $R^2 = 0.79$ ).

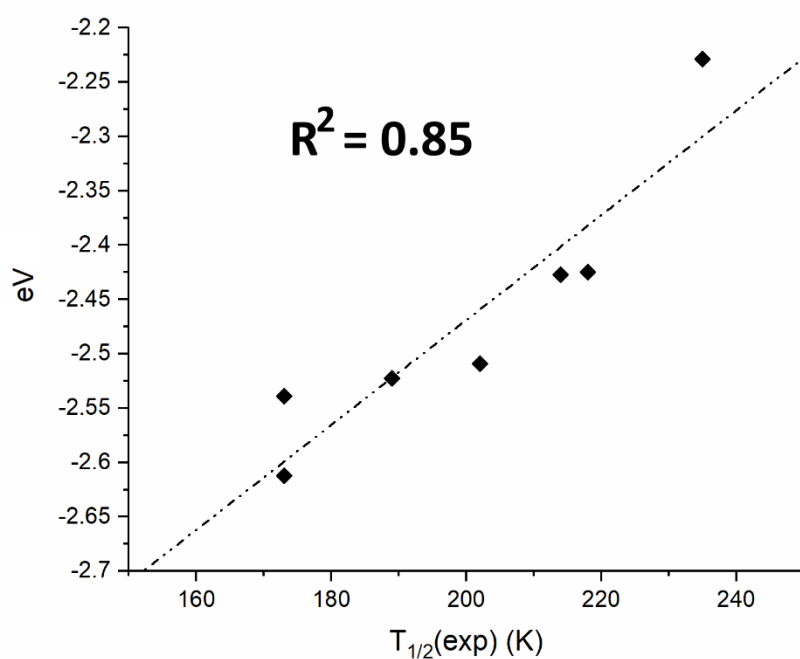

**Figure S116.** Reported trend for the variation of MO-276 $\alpha$  in  $1_{\text{cry,HS}}$  versus the measured  $T_{1/2}$  at seven different pressures ( $R^2 = 0.85$ ).

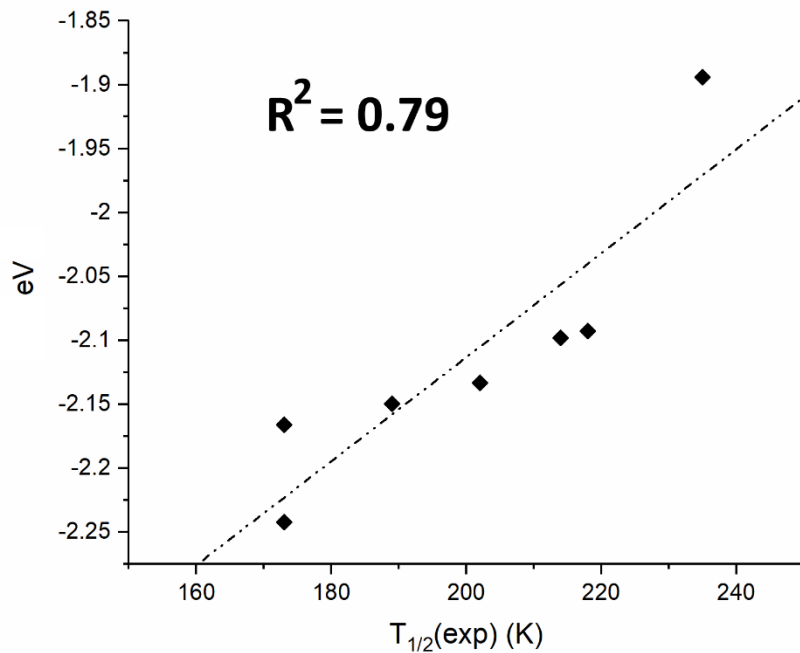

**Figure S117.** Reported trend for the variation of MO-273 $\beta$  in  $1_{\text{cry,HS}}$  versus the measured  $T_{1/2}$  at seven different pressures ( $R^2 = 0.79$ ).

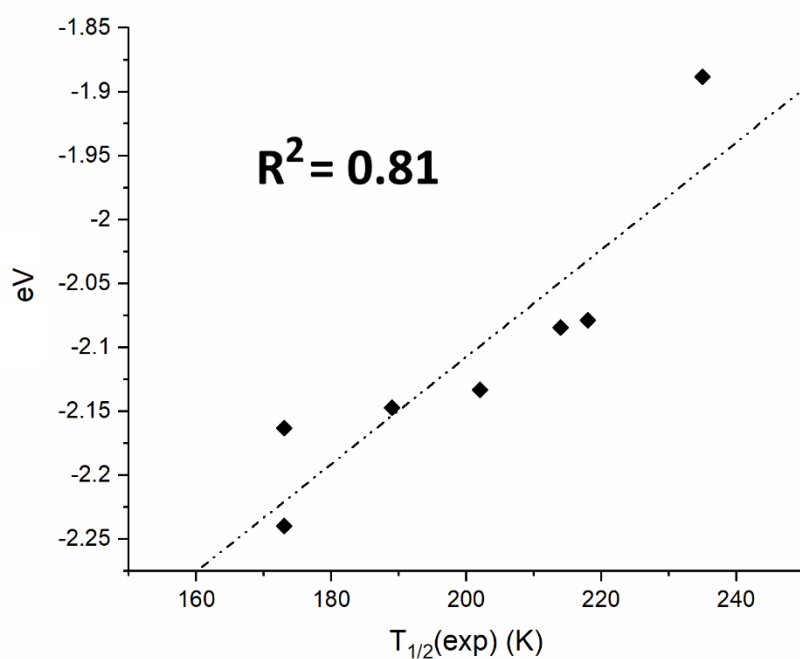

**Figure S118.** Reported trend for the variation of MO-274 $\beta$  in  $1_{\text{cry,HS}}$  versus the measured  $T_{1/2}$  at seven different pressures ( $R^2 = 0.81$ ).

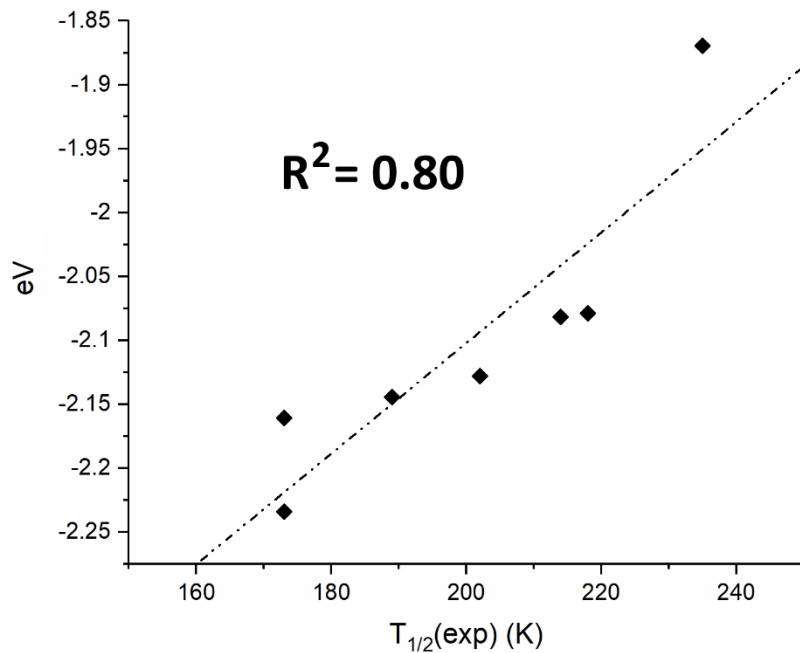

**Figure S119.** Reported trend for the variation of MO-275 $\beta$  in  $1_{\text{cry,HS}}$  versus the measured  $T_{1/2}$  at seven different pressures ( $R^2 = 0.80$ ).

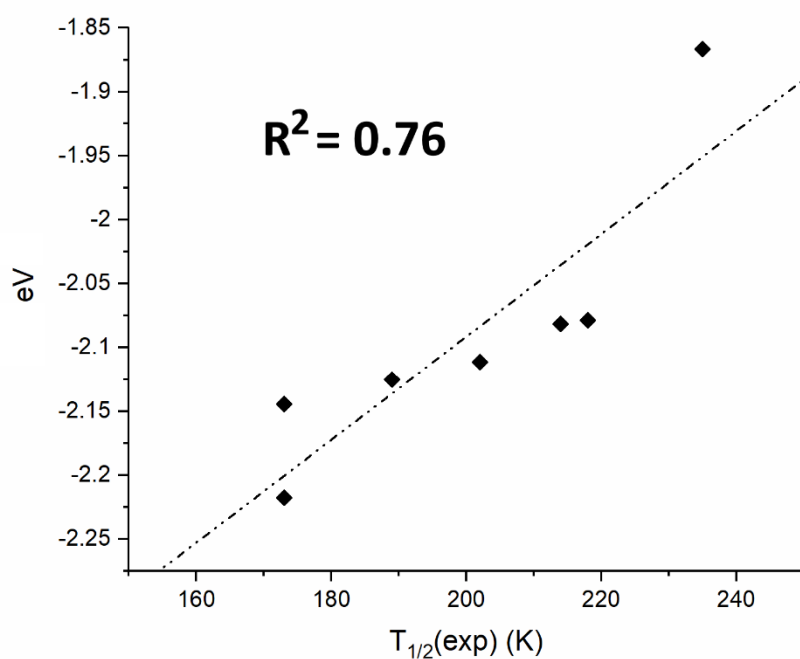

**Figure S120.** Reported trend for the variation of MO-276 $\beta$  in  $1_{\text{cry,HS}}$  versus the measured  $T_{1/2}$  at seven different pressures ( $R^2 = 0.76$ ).

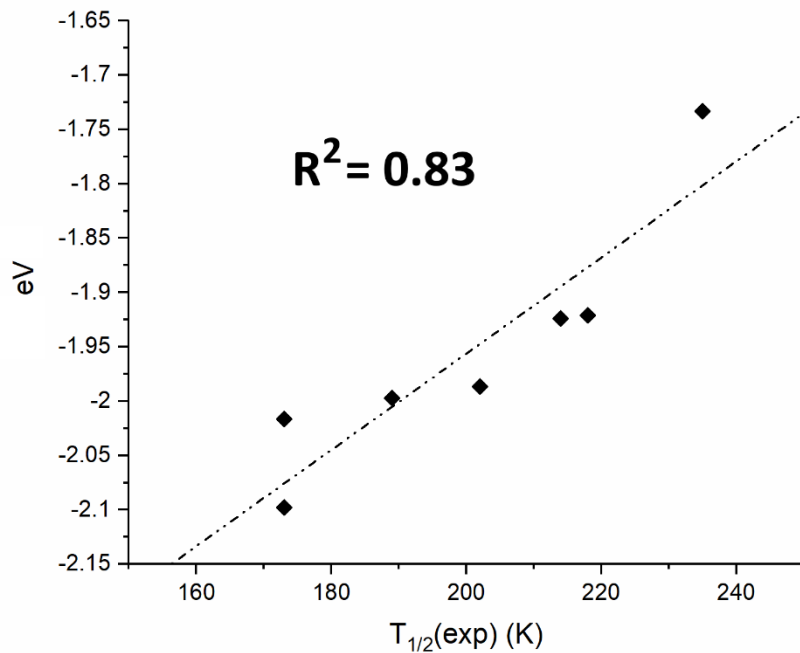

**Figure S121.** Reported trend for the variation of MO-277 $\beta$  in  $1_{\text{cry,HS}}$  versus the measured  $T_{1/2}$  at seven different pressures ( $R^2 = 0.83$ ).

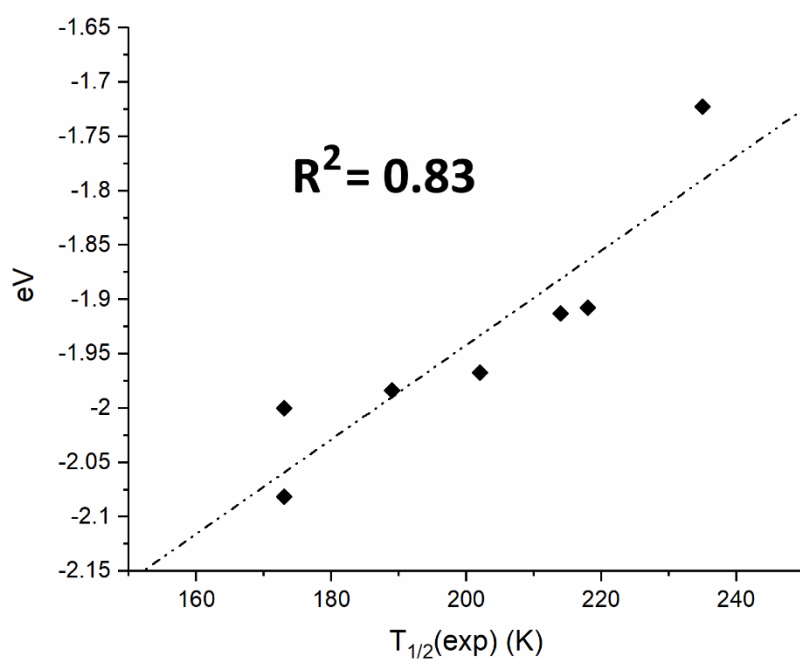

**Figure S122.** Reported trend for the variation of MO-279 $\beta$  in  $1_{\text{cry,HS}}$  versus the measured  $T_{1/2}$  at seven different pressures ( $R^2 = 0.83$ ).

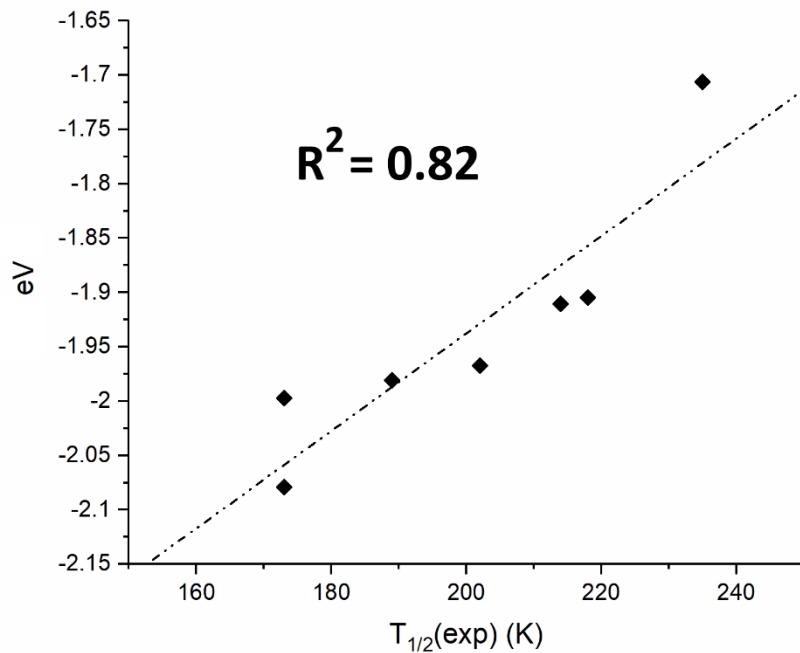

**Figure S123.** Reported trend for the variation of MO-280 $\beta$  in  $1_{\text{cry,HS}}$  versus the measured  $T_{1/2}$  at seven different pressures ( $R^2 = 0.82$ ).

**Table S13.** Calculated values of the frontier MOs (HOMO/LUMO) and the HOMO-LUMO gap ( $\Delta$ (MOs)) for  $1_{\text{cry,LS}}$  and  $1_{\text{cry,HS}}$ . Last two columns on the right reports the correlation factor for each of the three studied terms (HOMO, LUMO, HOMO-LUMO gap) for  $1_{\text{cry,LS}}$  and  $1_{\text{cry,HS}}$  against the seven pressures employed for this study and the relative experimental  $T_{1/2}$  measured at that pressure conditions.

| $p$ / bar                  |                | 1        | 1800     | 2100     | 2500     | 2900     | 3900     | 4300     | $R^2$ ( $p$ )       | $R^2$ ( $T_{1/2}(\text{exp})$ ) |
|----------------------------|----------------|----------|----------|----------|----------|----------|----------|----------|---------------------|---------------------------------|
| $T_{1/2}(\text{exp.})$ / K |                | 173      | 173      | 189      | 202      | 214      | 227      | 235      |                     |                                 |
| $1_{\text{cry,LS}}$        | HOMO           | 2.884681 | 2.971757 | 2.985363 | 2.999241 | 3.009037 | 3.056112 | 3.073147 | 0.99<br>(Fig. S124) | 0.81<br>(Fig. S127)             |
|                            | LUMO           | 3.330947 | 3.39816  | 3.409044 | 3.419929 | 3.446868 | 3.483059 | 3.495332 | 0.99<br>(Fig. S125) | 0.87<br>(Fig. S128)             |
|                            | $\Delta$ (MOs) | 0.446267 | 0.426403 | 0.423681 | 0.420688 | 0.437831 | 0.426947 | 0.422185 | 0.40<br>(Fig. S126) | 0.14<br>(Fig. S129)             |
| $1_{\text{cry,HS}}$        | HOMO           | 1.683025 | 1.768741 | 1.783435 | 1.800578 | 1.845477 | 1.850919 | 2.057617 | 0.78<br>(Fig. S124) | 0.74<br>(Fig. S127)             |
|                            | LUMO           | 2.861823 | 2.932028 | 2.94645  | 2.960872 | 3.028629 | 3.032438 | 3.210836 | 0.80<br>(Fig. S125) | 0.79<br>(Fig. S128)             |
|                            | $\Delta$ (MOs) | 1.178798 | 1.163287 | 1.163015 | 1.160566 | 1.183152 | 1.181519 | 1.153219 | 0.05<br>(Fig. S126) | 0.01<br>(Fig. S129)             |

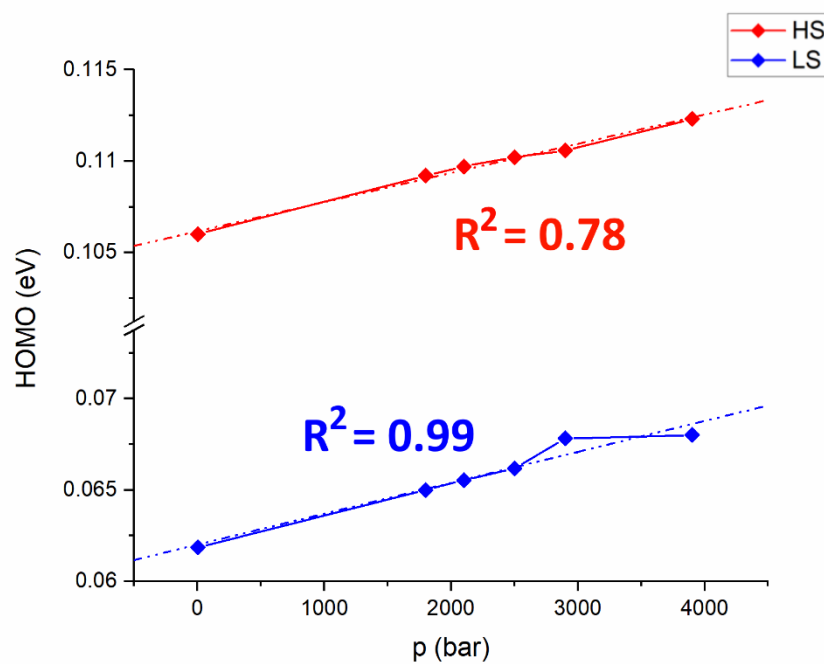

**Figure S124.** Reported trend for the variation of the HOMO energy levels at the pressure increase for  $1_{\text{cry,HS}}$  ( $R^2 = 0.78$ ) and  $1_{\text{cry,LS}}$  ( $R^2 = 0.99$ ).

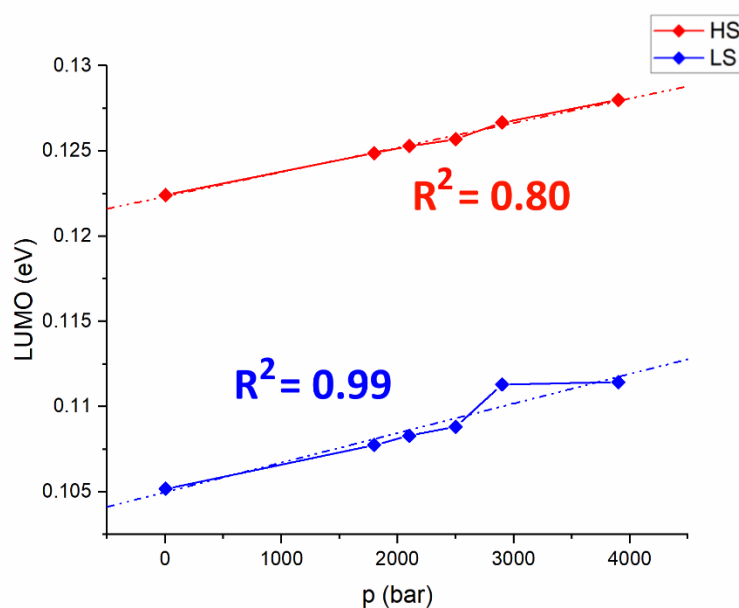

**Figure S125.** Reported trend for the variation of the HOMO energy levels at the pressure increase for  $1_{\text{cry,HS}}$  ( $R^2 = 0.80$ ) and  $1_{\text{cry,LS}}$  ( $R^2 = 0.99$ ).

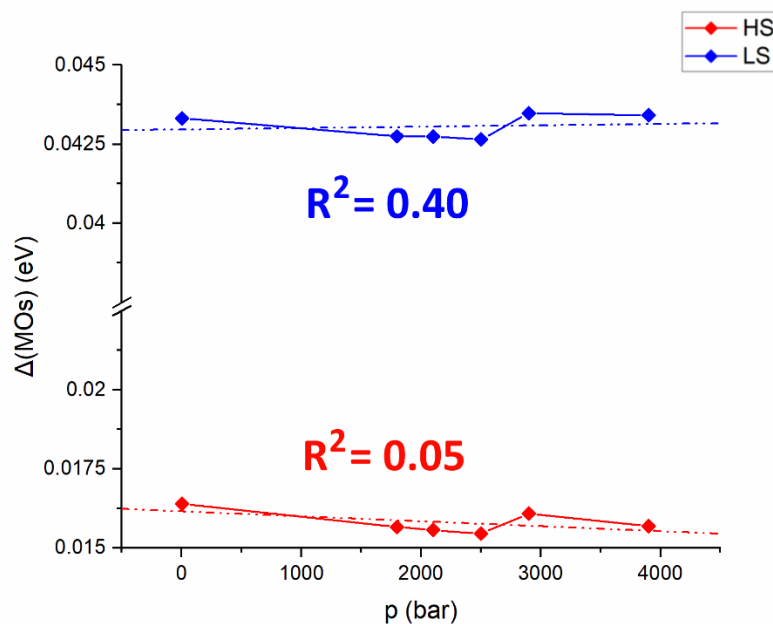

**Figure S126.** Reported trend for the variation of the HOMO-LUMO gap ( $\Delta\text{MOs}$ ) at the pressure increase for  $1_{\text{cry,HS}}$  ( $R^2 = 0.40$ ) and  $1_{\text{cry,LS}}$  ( $R^2 = 0.05$ ).

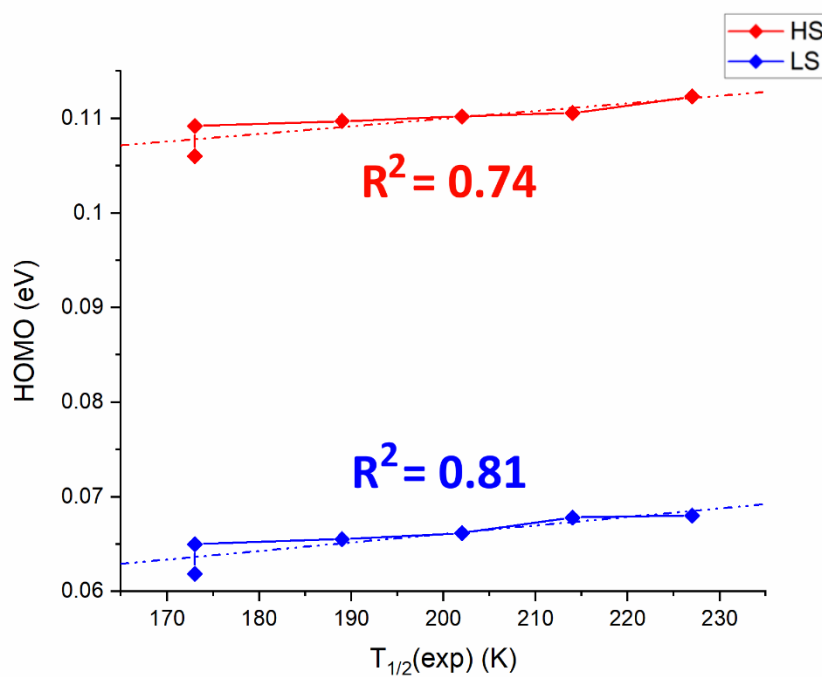

**Figure S127.** Reported trend for the variation of the HOMO energy levels of  $1_{\text{cry,HS}}$  ( $R^2 = 0.74$ ) and  $1_{\text{cry,LS}}$  ( $R^2 = 0.81$ ) at the measured  $T_{1/2}$  at the pressure increase.

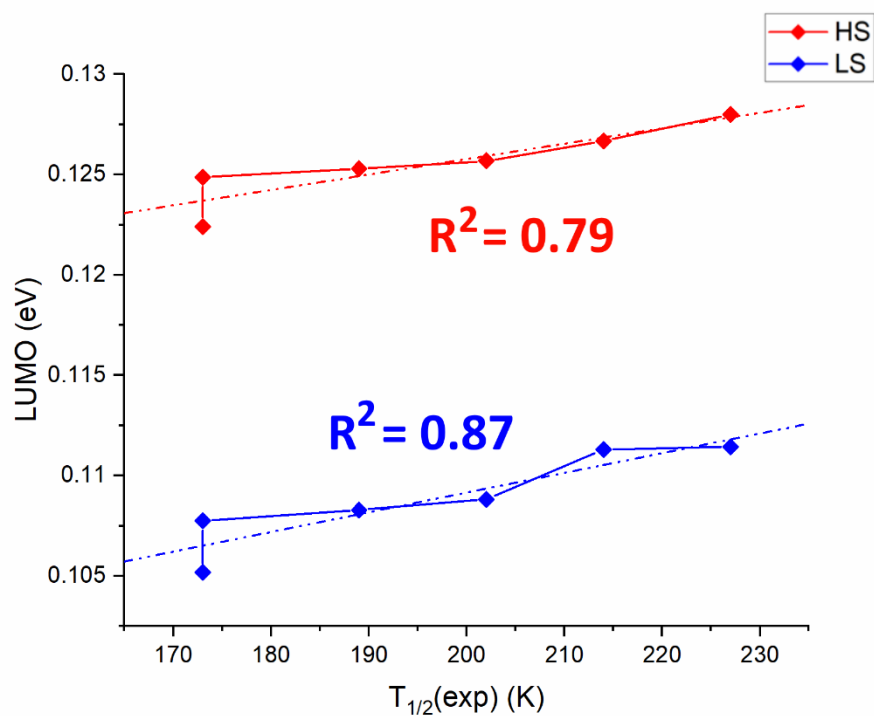

**Figure S128.** Reported trend for the variation of the LUMO energy levels of  $1_{\text{cry,HS}}$  ( $R^2 = 0.79$ ) and  $1_{\text{cry,LS}}$  ( $R^2 = 0.87$ ) at the measured  $T_{1/2}$  at the pressure increase.

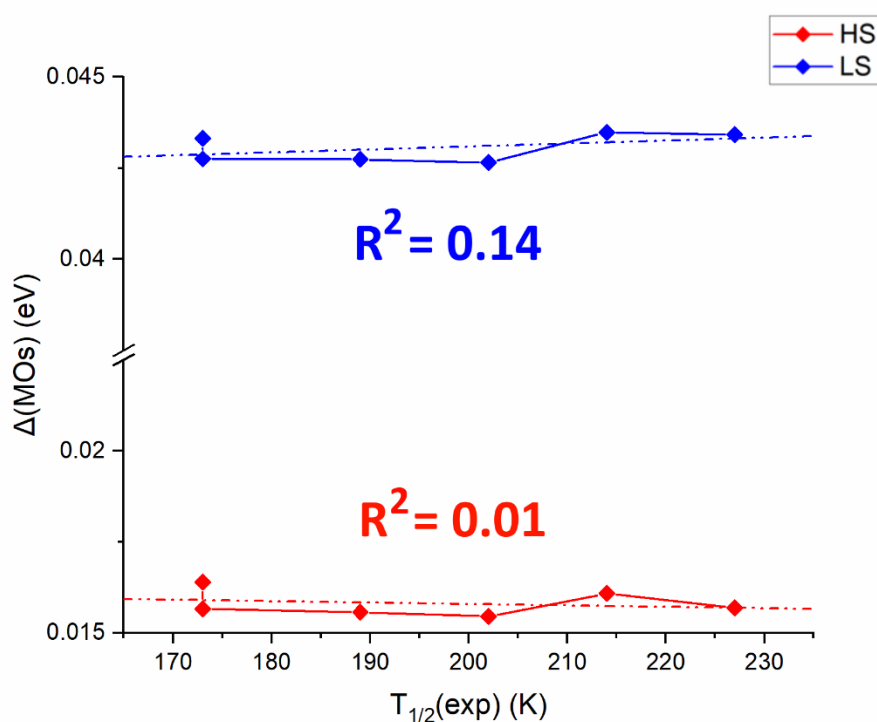

**Figure S129.** Reported trend for the variation of the HOMO-LUMO gap ( $\Delta\text{MOs}$ ) of  $1_{\text{cry,HS}}$  ( $R^2 = 0.14$ ) and  $1_{\text{cry,LS}}$  ( $R^2 = 0.01$ ) at the measured  $T_{1/2}$  at the pressure increase.

## 4. Additional Data for *Gradual SCO* Modelling

### 4.1. CP2K 6.1 Calculated IR Spectra

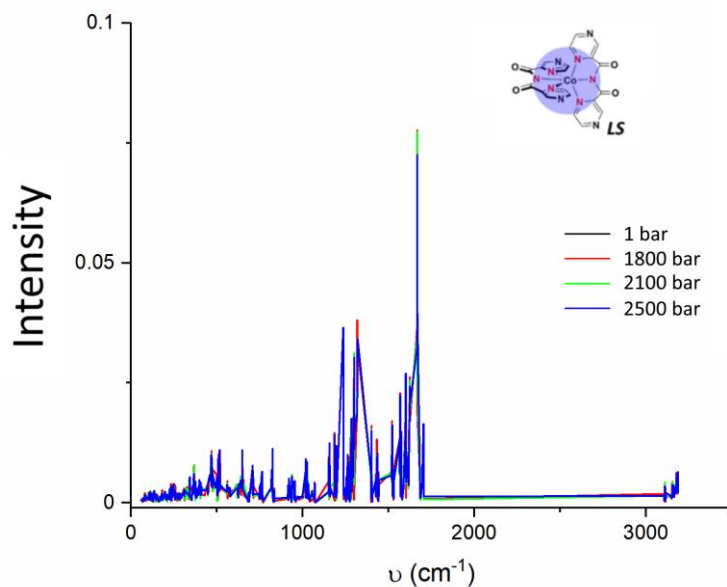

**Figure S130.** Reported IR spectra calculated with CP2K6.1 code for crystalline  $1_{\text{cry,LS}}$  at the four different pressures ( $p = 1, 1800, 2100, 2500$  bar) where the SCO transition was modelled properly.

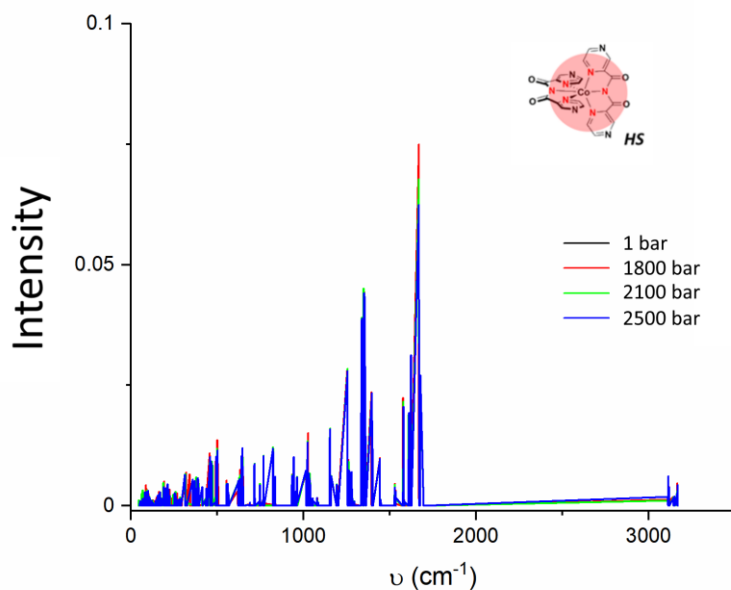

**Figure S131.** Reported IR spectra calculated with CP2K6.1 code for crystalline  $1_{\text{cry,HS}}$  at three different pressures ( $p = 1, 1800, 2100, 2500$  bar) where the SCO transition was modelled properly.

## 4.2. IR/Raman Spectra ORCA4.1 code

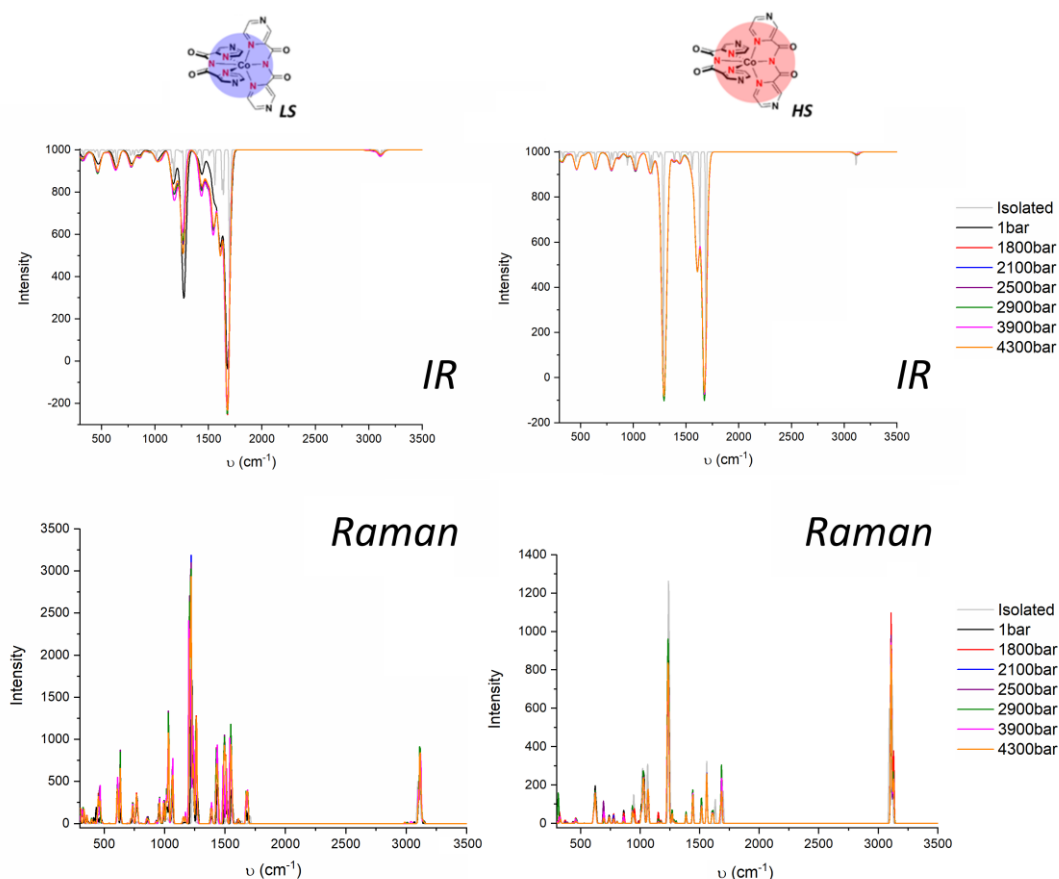

**Figure S132.** Calculated IR and Raman spectra for  $1_{cf,LS}$  (left) and  $1_{cf,HS}$  (right) obtained by extrapolation from the crystalline cell and re-optimised using ORCA4.1 code using RI-PBE-def2-TZVPP level of theory ( $w = 10$ ).

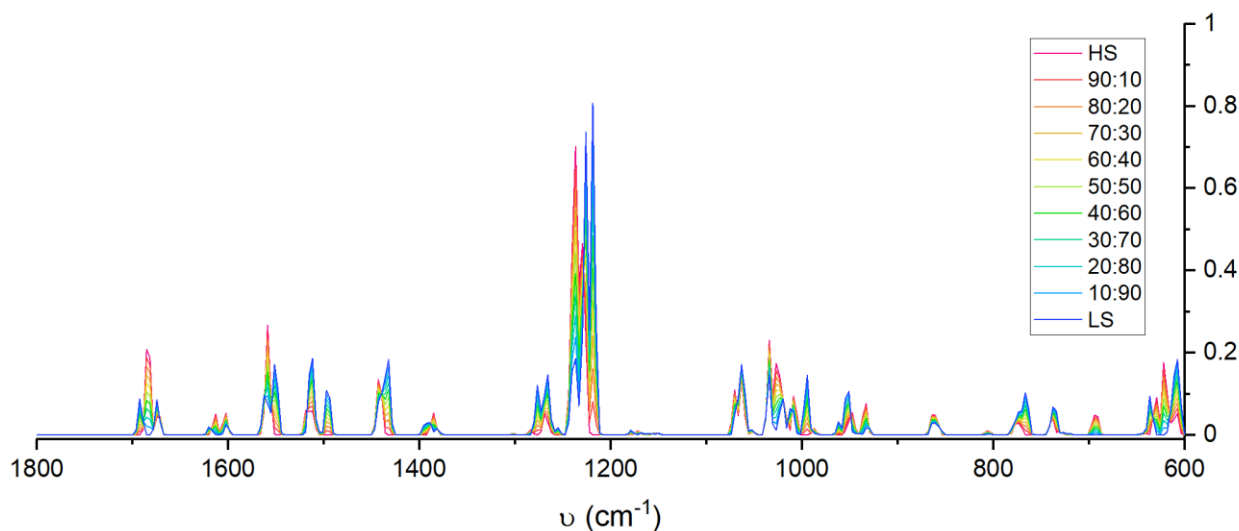

**Figure S133.** Variation of the calculated Raman Spectrum of  $1_{cf}$  at  $p = 1$  bar, from  $1_{cf,LS}$  and  $1_{cf,HS}$ . Spectra were obtained using ORCA4.1 code: RI-PBE-def2-TZVPP level of theory ( $w = 5$ ).

## 4.3. Thermodynamic Terms

**Table S14.** Summary table of the thermodynamic contribution ( $H_{el}$ ) for  $1_{cry,HS}$  and  $1_{cry,LS}$  at different pressure (from 1 bar to 2900 bar). Results are reported in eV.

| $H_{el}$ (eV) |             |             |          |
|---------------|-------------|-------------|----------|
| p / bar       | HS          | LS          | $\Delta$ |
| 1             | -46632.1965 | -46632.5185 | 0.3220   |
| 1800          | -46632.1911 | -46632.5068 | 0.3157   |
| 2100          | -46632.1854 | -46632.5027 | 0.3173   |
| 2500          | -46632.1801 | -46632.4962 | 0.3161   |
| 2900          | -46631.4015 | -46632.4855 | 1.0840   |
| 3900          | -46631.3854 | -46632.4632 | 1.0780   |
| 4300          | -46630.8149 | -46632.4516 | 1.6363   |

**Table S15.** Summary table of the thermodynamic contribution ( $S_{el}$ ) for  $1_{cry,HS}$  and  $1_{cry,LS}$  at different pressure (from 1 bar to 2900 bar). Results are reported in eV.

| $S_{el}$ (eV) |          |          |          |
|---------------|----------|----------|----------|
| p / bar       | HS       | LS       | $\Delta$ |
| 1             | 0.000214 | 0.000134 | 0.00080  |
| 1800          | 0.000214 | 0.000134 | 0.00080  |
| 2100          | 0.000214 | 0.000134 | 0.00080  |
| 2500          | 0.000214 | 0.000134 | 0.00080  |
| 2900          | 0.000214 | 0.000134 | 0.00080  |
| 3900          | 0.000214 | 0.000134 | 0.00080  |

**Table S16.** Summary table of the thermodynamic contribution ( $H_{vib}$ ) for  $1_{crys,LS}$  at different pressure (from 1 bar to 2900 bar). Results are reported in eV.

| p / bar | 1                   | 1800   | 2100   | 2500   | 2900   | 3900   |
|---------|---------------------|--------|--------|--------|--------|--------|
| T / K   | $H_{vib} (LS) / eV$ |        |        |        |        |        |
| 25      | 34.205              | 34.213 | 34.213 | 34.220 | 34.224 | 33.951 |
| 50      | 34.243              | 34.250 | 34.250 | 34.258 | 34.263 | 34.005 |
| 75      | 34.337              | 34.344 | 34.344 | 34.351 | 34.357 | 34.117 |
| 100     | 34.486              | 34.492 | 34.492 | 34.498 | 34.504 | 34.281 |
| 125     | 34.683              | 34.688 | 34.689 | 34.695 | 34.701 | 34.492 |
| 150     | 34.924              | 34.930 | 34.931 | 34.936 | 34.941 | 34.746 |
| 155     | 34.977              | 34.983 | 34.984 | 34.989 | 34.995 | 34.801 |
| 160     | 35.032              | 35.038 | 35.039 | 35.044 | 35.050 | 34.859 |
| 165     | 35.089              | 35.095 | 35.096 | 35.100 | 35.106 | 34.917 |
| 170     | 35.147              | 35.153 | 35.154 | 35.159 | 35.164 | 34.978 |
| 175     | 35.207              | 35.213 | 35.214 | 35.219 | 35.224 | 35.040 |
| 180     | 35.269              | 35.274 | 35.275 | 35.280 | 35.286 | 35.103 |
| 185     | 35.332              | 35.338 | 35.339 | 35.343 | 35.349 | 35.168 |
| 190     | 35.396              | 35.402 | 35.403 | 35.408 | 35.413 | 35.235 |
| 195     | 35.463              | 35.469 | 35.470 | 35.474 | 35.479 | 35.303 |
| 200     | 35.530              | 35.536 | 35.537 | 35.542 | 35.547 | 35.372 |
| 225     | 35.893              | 35.899 | 35.900 | 35.904 | 35.909 | 35.744 |
| 250     | 36.293              | 36.300 | 36.301 | 36.305 | 36.310 | 36.152 |
| 275     | 36.732              | 36.739 | 36.740 | 36.744 | 36.748 | 36.598 |
| 300     | 37.207              | 37.214 | 37.215 | 37.219 | 37.223 | 37.079 |
| 325     | 37.717              | 37.725 | 37.726 | 37.729 | 37.734 | 37.596 |
| 350     | 38.262              | 38.269 | 38.271 | 38.274 | 38.278 | 38.147 |
| 375     | 38.840              | 38.847 | 38.848 | 38.852 | 38.856 | 38.729 |
| 400     | 39.448              | 39.456 | 39.457 | 39.461 | 39.465 | 39.343 |

**Table S17.** Summary table of the thermodynamic contribution ( $H_{vib}$ ) for  $1_{cry,HS}$  at different pressure (from 1 bar to 2900 bar). Results are reported in eV.

| p / bar | 1                          | 1800   | 2100   | 2500   | 2900   | 3900   |
|---------|----------------------------|--------|--------|--------|--------|--------|
| T / K   | $H_{vib} (HS) / \text{eV}$ |        |        |        |        |        |
| 25      | 34.046                     | 34.059 | 34.068 | 34.064 | 34.124 | 34.218 |
| 50      | 34.098                     | 34.112 | 34.119 | 34.116 | 34.174 | 34.258 |
| 75      | 34.215                     | 34.227 | 34.232 | 34.230 | 34.284 | 34.356 |
| 100     | 34.385                     | 34.397 | 34.401 | 34.399 | 34.448 | 34.510 |
| 125     | 34.602                     | 34.613 | 34.616 | 34.615 | 34.660 | 34.713 |
| 150     | 34.861                     | 34.871 | 34.874 | 34.873 | 34.915 | 34.960 |
| 155     | 34.918                     | 34.927 | 34.930 | 34.930 | 34.970 | 35.015 |
| 160     | 34.976                     | 34.985 | 34.988 | 34.988 | 35.028 | 35.071 |
| 165     | 35.036                     | 35.045 | 35.048 | 35.047 | 35.087 | 35.129 |
| 170     | 35.097                     | 35.106 | 35.109 | 35.108 | 35.147 | 35.188 |
| 175     | 35.159                     | 35.168 | 35.171 | 35.171 | 35.209 | 35.249 |
| 180     | 35.223                     | 35.232 | 35.235 | 35.235 | 35.272 | 35.311 |
| 185     | 35.289                     | 35.298 | 35.301 | 35.300 | 35.337 | 35.375 |
| 190     | 35.356                     | 35.365 | 35.368 | 35.367 | 35.404 | 35.441 |
| 195     | 35.425                     | 35.433 | 35.436 | 35.436 | 35.472 | 35.508 |
| 200     | 35.495                     | 35.503 | 35.506 | 35.506 | 35.542 | 35.576 |
| 225     | 35.868                     | 35.876 | 35.879 | 35.879 | 35.912 | 35.942 |
| 250     | 36.277                     | 36.285 | 36.288 | 36.288 | 36.319 | 36.346 |
| 275     | 36.722                     | 36.730 | 36.733 | 36.733 | 36.762 | 36.787 |
| 300     | 37.203                     | 37.211 | 37.214 | 37.214 | 37.241 | 37.264 |
| 325     | 37.718                     | 37.726 | 37.729 | 37.730 | 37.755 | 37.775 |
| 350     | 38.267                     | 38.275 | 38.278 | 38.278 | 38.303 | 38.321 |
| 375     | 38.848                     | 38.856 | 38.858 | 38.859 | 38.882 | 38.899 |
| 400     | 39.459                     | 39.467 | 39.470 | 39.470 | 39.493 | 39.508 |

**Table S18.** Summary table of the thermodynamic contribution ( $S_{vib}$ ) for  $1_{cry,LS}$  at different pressure (from 1 bar to 2900 bar). Results are reported in eV.

| p / bar | 1                   | 1800  | 2100  | 2500  | 2900  | 3900  |
|---------|---------------------|-------|-------|-------|-------|-------|
| T / K   | $S_{vib} (LS) / eV$ |       |       |       |       |       |
| 25      | 0.000               | 0.000 | 0.000 | 0.000 | 0.000 | 0.000 |
| 50      | 0.001               | 0.001 | 0.001 | 0.001 | 0.001 | 0.002 |
| 75      | 0.003               | 0.003 | 0.003 | 0.003 | 0.003 | 0.004 |
| 100     | 0.004               | 0.004 | 0.004 | 0.004 | 0.004 | 0.005 |
| 125     | 0.006               | 0.006 | 0.006 | 0.006 | 0.006 | 0.007 |
| 150     | 0.008               | 0.008 | 0.008 | 0.008 | 0.008 | 0.009 |
| 155     | 0.008               | 0.008 | 0.008 | 0.008 | 0.008 | 0.010 |
| 160     | 0.009               | 0.008 | 0.008 | 0.009 | 0.009 | 0.010 |
| 165     | 0.009               | 0.009 | 0.009 | 0.009 | 0.009 | 0.010 |
| 170     | 0.009               | 0.009 | 0.009 | 0.009 | 0.009 | 0.011 |
| 175     | 0.010               | 0.010 | 0.010 | 0.010 | 0.010 | 0.011 |
| 180     | 0.010               | 0.010 | 0.010 | 0.010 | 0.010 | 0.011 |
| 185     | 0.010               | 0.010 | 0.010 | 0.010 | 0.010 | 0.012 |
| 190     | 0.011               | 0.011 | 0.011 | 0.011 | 0.011 | 0.012 |
| 195     | 0.011               | 0.011 | 0.011 | 0.011 | 0.011 | 0.012 |
| 200     | 0.011               | 0.011 | 0.011 | 0.011 | 0.011 | 0.013 |
| 225     | 0.013               | 0.013 | 0.013 | 0.013 | 0.013 | 0.014 |
| 250     | 0.015               | 0.015 | 0.015 | 0.015 | 0.015 | 0.016 |
| 275     | 0.016               | 0.016 | 0.016 | 0.016 | 0.016 | 0.018 |
| 300     | 0.018               | 0.018 | 0.018 | 0.018 | 0.018 | 0.020 |
| 325     | 0.020               | 0.020 | 0.020 | 0.020 | 0.020 | 0.021 |
| 350     | 0.021               | 0.021 | 0.021 | 0.021 | 0.021 | 0.023 |
| 375     | 0.023               | 0.023 | 0.023 | 0.023 | 0.023 | 0.024 |
| 400     | 0.024               | 0.024 | 0.024 | 0.024 | 0.024 | 0.026 |

**Table S19.** Summary table of the thermodynamic contribution ( $S_{vib}$ ) for  $1_{cry,HS}$  at different pressure (from 1 bar to 2900 bar). Results are reported in eV.

| p / bar | 1                   | 1800  | 2100  | 2500  | 2900  | 3900  |
|---------|---------------------|-------|-------|-------|-------|-------|
| T / K   | $S_{vib} (HS) / eV$ |       |       |       |       |       |
| 25      | 0.000               | 0.000 | 0.000 | 0.000 | 0.000 | 0.000 |
| 50      | 0.002               | 0.002 | 0.002 | 0.002 | 0.002 | 0.001 |
| 75      | 0.003               | 0.004 | 0.003 | 0.003 | 0.003 | 0.003 |
| 100     | 0.005               | 0.005 | 0.005 | 0.005 | 0.005 | 0.005 |
| 125     | 0.007               | 0.007 | 0.007 | 0.007 | 0.007 | 0.006 |
| 150     | 0.009               | 0.009 | 0.009 | 0.009 | 0.009 | 0.008 |
| 155     | 0.010               | 0.010 | 0.009 | 0.010 | 0.009 | 0.008 |
| 160     | 0.010               | 0.010 | 0.010 | 0.010 | 0.010 | 0.009 |
| 165     | 0.010               | 0.010 | 0.010 | 0.010 | 0.010 | 0.009 |
| 170     | 0.011               | 0.011 | 0.011 | 0.011 | 0.010 | 0.010 |
| 175     | 0.011               | 0.011 | 0.011 | 0.011 | 0.011 | 0.010 |
| 180     | 0.011               | 0.011 | 0.011 | 0.011 | 0.011 | 0.010 |
| 185     | 0.012               | 0.012 | 0.012 | 0.012 | 0.011 | 0.011 |
| 190     | 0.012               | 0.012 | 0.012 | 0.012 | 0.012 | 0.011 |
| 195     | 0.013               | 0.013 | 0.012 | 0.012 | 0.012 | 0.011 |
| 200     | 0.013               | 0.013 | 0.013 | 0.013 | 0.013 | 0.012 |
| 225     | 0.015               | 0.015 | 0.014 | 0.015 | 0.014 | 0.013 |
| 250     | 0.016               | 0.016 | 0.016 | 0.016 | 0.016 | 0.015 |
| 275     | 0.018               | 0.018 | 0.018 | 0.018 | 0.018 | 0.017 |
| 300     | 0.020               | 0.020 | 0.020 | 0.020 | 0.019 | 0.018 |
| 325     | 0.021               | 0.021 | 0.021 | 0.021 | 0.021 | 0.020 |
| 350     | 0.023               | 0.023 | 0.023 | 0.023 | 0.023 | 0.022 |
| 375     | 0.025               | 0.025 | 0.024 | 0.025 | 0.024 | 0.023 |
| 400     | 0.026               | 0.026 | 0.026 | 0.026 | 0.026 | 0.025 |

# References

1. Hutter, J.; Iannuzzi, M.; Schiffmann, F.; VandeVondele, J., CP2K: atomistic simulations of condensed matter systems. *Wiley Interdiscip. Rev. Comput. Mol. Sci.* **2014**, 4 (1), 15-25.
2. Krack, M., Pseudopotentials for H to Kr optimized for gradient-corrected exchange-correlation functionals. *Theor. Chem. Acc.* **2005**, 114 (1-3), 145-152.
3. Hartwigsen, C.; Goedecker, S.; Hutter, J., Relativistic separable dual-space Gaussian pseudopotentials from H to Rn. *Phys. Rev. B* **1998**, 58 (7), 3641.
4. Goedecker, S.; Teter, M.; Hutter, J., Separable dual-space Gaussian pseudopotentials. *Phys. Rev. B* **1996**, 54 (3), 1703-1710.
5. Caldeweyher, E.; Bannwarth, C.; Grimme, S., Extension of the D3 dispersion coefficient model. *J. Chem. Phys.* **2017**, 147 (3), 034112.
6. Dudarev, S. L.; Botton, G. A.; Savrasov, S. Y.; Humphreys, C. J.; Sutton, A. P., Electron-energy-loss spectra and the structural stability of nickel oxide: An LSDA+U study. *Phys. Rev. B* **1998**, 57 (3), 1505-1509.
7. Aryasetiawan, F.; Karlsson, K.; Jepsen, O.; Schönberger, U., Calculations of Hubbard U from first-principles. *Phys. Rev. B* **2006**, 74 (12), 125106.
8. Miller, R. G.; Narayanaswamy, S.; Clark, S. M.; Jameson, G. B.; Tallon, J. L.; Brooker, S., Pressure induced separation of phase-transition-triggered-abrupt vs gradual components of spin crossover. *Dalton Trans.* **2015**, 44, 20843-20849 and front cover.
9. Perdew, J. P.; Ruzsinszky, A.; Csonka, G. I.; Vydrov, O. A.; Scuseria, G. E.; Constantin, L. A.; Zhou, X.; Burke, K., Restoring the density-gradient expansion for exchange in solids and surfaces. *Phys. Rev. Lett.* **2008**, 100 (13), 136406.
10. Vydrov, O. A.; Van Voorhis, T., Nonlocal van der Waals density functional: The simpler the better. *J. Chem. Phys.* **2010**, 133 (24), 244103.
11. Sabatini, R.; Gorni, T.; de Gironcoli, S., Nonlocal van der Waals density functional made simple and efficient. *Phys. Rev. B* **2013**, 87 (4), 041108.
12. Neese, F., Software update: the ORCA program system, version 4.0. *WIREs Comput. Mol. Sci.* **2018**, 8 (1), e1327.
13. Perdew, J. P.; Yue, W., Accurate and simple density functional for the electronic exchange energy: Generalized gradient approximation. *Phys. Rev. B* **1986**, 33 (12), 8800-8802.
14. Weigend, F.; Ahlrichs, R., Balanced basis sets of split valence, triple zeta valence and quadruple zeta valence quality for H to Rn: Design and assessment of accuracy. *Phys. Chem. Chem. Phys.* **2005**, 7 (18), 3297-3305.
15. Weigend, F., Accurate Coulomb-fitting basis sets for H to Rn. *Phys. Chem. Chem. Phys.* **2006**, 8 (9), 1057-1065.
16. Neese, F., *Wiley Interdiscip. Rev. Comput. Mol. Sci.* **2012**, 2, 73.
17. Buron-Le Cointe, M.; Hébert, J.; Baldé, C.; Moisan, N.; Toupet, L.; Guionneau, P.; Létard, J. F.; Freysz, E.; Cailleau, H.; Collet, E., Intermolecular Control of Thermoswitching and Photoswitching Phenomena in Two Spin-Crossover Polymorphs. *Phys. Rev. B: Condens. Matter Mater. Phys.* **2012**, 85, 064114.

18. Lufaso, M. W.; Woodward, P. M., Jahn–Teller distortions, cation ordering and octahedral tilting in perovskites. *Acta Crystallogr. B Struct. Sci. Cryst.* **2004**, *60* (1), 10-20.
19. McCusker, J. K.; Rheingold, A. L.; Hendrickson, D. N., Variable-Temperature Studies of Laser-Initiated  $^5T_2 - ^1A_1$  Intersystem Crossing in Spin-Crossover Complexes: Empirical Correlations between Activation Parameters and Ligand Structure in a Series of Poly pyridyl Ferrous Complexes. *Inorg. Chem.* **1996**, *35*, 2100-2112.
20. Marchivie, M.; Guionneau, P.; Létard, J. F.; Chasseau, D., Photo-Induced Spin-Transition: the Role of the Iron(II) Environment Distortion. *Acta Crystallogr., Sect. B: Struct. Sci.* **2005**, *61*, 25.
21. Kuehne, I. A.; Barker, A.; Zhang, F.; Stamenov, P.; O'Doherty, O.; Müller-Bunz, H.; Stein, M.; Rodriguez, B. J.; MORGAN, G. G., Modulation of Jahn-Teller Distortion and Electromechanical Response in a Mn  $3+$  Spin Crossover Complex. *J. Phys. Condens. Matter* **2020**, *32* (40), 404002.
22. Ketkaew, R.; Tantirungrotechai, Y.; Harding, P.; Chastanet, G.; Guionneau, P.; Marchivie, M.; Harding, D. J., OctaDist: A tool for calculating distortion parameters in spin crossover and coordination complexes. *Dalton Trans.* **2021**, *50*, 1086-1096.
23. Humphrey, W.; Dalke, A.; Schulten, K., VMD: visual molecular dynamics. *J. Mol. Graph.* **1996**, *14* (1), 33-38.
